# Supplementary material for: Comparative RNAi Screens in C. elegans and C. briggsae Reveal the Impact of Developmental System Drift on Gene Function
Source: PubMed Central journal article supplement (PMC3916228; doi:10.1371/journal.pgen.1004077), 2014-02-06
Supplement: pgen.1004077.s007.pdf [file pgen.1004077.s007.pdf]

| Gene (WBID)    | Gene (Common)     | <i>C. briggsae</i> ortholog | Confidence Score | Difference in -log10 BLAST E-values | BLAST proteome result        | Synteny result           | Treefam result           | Different Phenotype? |
|----------------|-------------------|-----------------------------|------------------|-------------------------------------|------------------------------|--------------------------|--------------------------|----------------------|
| WBGene00016323 | <i>C32E8.5</i>    | CBG12001                    | 3                | 114.79588                           | Unambiguous reciprocal BLAST | Supported by synteny     | Confirmed by Treefam     | Different Phenotype  |
| WBGene00017852 | <i>F27C1.2</i>    | CBG12308                    | 3                | 107.3679768                         | Unambiguous reciprocal BLAST | Supported by synteny     | Confirmed by Treefam     | Different Phenotype  |
| WBGene00000814 | <i>csn-2</i>      | CBG22097                    | 3                | 101.8239087                         | Unambiguous reciprocal BLAST | Supported by synteny     | Confirmed by Treefam     | Different Phenotype  |
| WBGene00022631 | <i>nekl-2</i>     | CBG12695                    | 3                | 107                                 | Unambiguous reciprocal BLAST | Supported by synteny     | Confirmed by Treefam     | Different Phenotype  |
| WBGene00000431 | <i>ceh-6</i>      | CBG12531                    | 3                | Inf                                 | Unambiguous reciprocal BLAST | Supported by synteny     | Confirmed by Treefam     | Different Phenotype  |
| WBGene00009264 | <i>sac-1</i>      | CBG24498                    | 3                | Inf                                 | Unambiguous reciprocal BLAST | Supported by synteny     | Confirmed by Treefam     | Different Phenotype  |
| WBGene00003904 | <i>pabp-2</i>     | CBG03741                    | 3                | 71.82390874                         | Unambiguous reciprocal BLAST | Supported by synteny     | Confirmed by Treefam     | Different Phenotype  |
| WBGene00003209 | <i>mel-26</i>     | CBG12451                    | 3                | Inf                                 | Unambiguous reciprocal BLAST | Supported by synteny     | Confirmed by Treefam     | Different Phenotype  |
| WBGene00007275 | <i>C03D6.1</i>    | CBG03701                    | 3                | 114                                 | Unambiguous reciprocal BLAST | Supported by synteny     | Not confirmed by Treefam | Different Phenotype  |
| WBGene00003123 | <i>mag-1</i>      | CBG18690                    | 3                | 104.6690068                         | Unambiguous reciprocal BLAST | Supported by synteny     | Confirmed by Treefam     | Different Phenotype  |
| WBGene00012235 | <i>W04A4.6</i>    | CBG13613                    | 3                | 74.81291336                         | Unambiguous reciprocal BLAST | Supported by synteny     | Not confirmed by Treefam | Different Phenotype  |
| WBGene00021465 | <i>Y39G10AR.7</i> | CBG03924                    | 3                | 134.544068                          | Unambiguous reciprocal BLAST | Not supported by synteny | Confirmed by Treefam     | Different Phenotype  |
| WBGene00022027 | <i>ups-20</i>     | CBG05144                    | 3                | 112.69897                           | Unambiguous reciprocal BLAST | Supported by synteny     | Confirmed by Treefam     | Different Phenotype  |
| WBGene00022117 | <i>Y71F9AL.12</i> | CBG04229                    | 3                | 106.30103                           | Unambiguous reciprocal BLAST | Supported by synteny     | Confirmed by Treefam     | Different Phenotype  |
| WBGene00020149 | <i>T01D1.4</i>    | CBG06970                    | 3                | 60                                  | Unambiguous reciprocal BLAST | Supported by synteny     | Confirmed by Treefam     | Different Phenotype  |
| WBGene00006647 | <i>tsr-1</i>      | CBG20440                    | 3                | Inf                                 | Unambiguous reciprocal BLAST | Not supported by synteny | Confirmed by Treefam     | Different Phenotype  |
| WBGene00017916 | <i>F29A7.6</i>    | CBG19575                    | 3                | 44                                  | Unambiguous reciprocal BLAST | Supported by synteny     | Confirmed by Treefam     | Different Phenotype  |
| WBGene00015298 | <i>C01F1.3</i>    | CBG03656                    | 3                | Inf                                 | Unambiguous reciprocal BLAST | Supported by synteny     | Confirmed by Treefam     | Different Phenotype  |
| WBGene00018961 | <i>F56D1.3</i>    | CBG02407                    | 3                | 86.18563658                         | Unambiguous reciprocal BLAST | Supported by synteny     | Confirmed by Treefam     | Different Phenotype  |
| WBGene00019126 | <i>F59E12.11</i>  | CBG02460                    | 3                | 133.30103                           | Unambiguous reciprocal BLAST | Supported by synteny     | Confirmed by Treefam     | Different Phenotype  |
| WBGene00004198 | <i>prx-13</i>     | CBG13114                    | 3                | 164.5228787                         | Unambiguous reciprocal BLAST | Supported by synteny     | Confirmed by Treefam     | Different Phenotype  |
| WBGene00014066 | <i>rev-1</i>      | CBG03293                    | 3                | Inf                                 | Unambiguous reciprocal BLAST | Supported by synteny     | Confirmed by Treefam     | Different Phenotype  |
| WBGene00010941 | <i>M176.2</i>     | CBG13395                    | 3                | Inf                                 | Unambiguous reciprocal BLAST | Supported by synteny     | Confirmed by Treefam     | Different Phenotype  |
| WBGene00009504 | <i>F37B12.1</i>   | CBG03244                    | 3                | 117.6532125                         | Unambiguous reciprocal BLAST | Supported by synteny     | Not confirmed by Treefam | Different Phenotype  |
| WBGene00018793 | <i>F54C4.1</i>    | CBG00465                    | 3                | 102.4149733                         | Unambiguous reciprocal BLAST | Supported by synteny     | Confirmed by Treefam     | Different Phenotype  |
| WBGene00003912 | <i>pal-1</i>      | CBG17980                    | 3                | 115.5228787                         | Unambiguous reciprocal BLAST | Supported by synteny     | Not confirmed by Treefam | Different Phenotype  |
| WBGene00016442 | <i>C35D10.5</i>   | CBG17958                    | 3                | 137.845098                          | Unambiguous reciprocal BLAST | Supported by synteny     | Confirmed by Treefam     | Different Phenotype  |
| WBGene00016169 | <i>C27F2.7</i>    | CBG18209                    | 3                | Inf                                 | Unambiguous reciprocal BLAST | Supported by synteny     | Confirmed by Treefam     | Different Phenotype  |
| WBGene0001662  | <i>gop-3</i>      | CBG21181                    | 3                | Inf                                 | Unambiguous reciprocal BLAST | Supported by synteny     | Confirmed by Treefam     | Different Phenotype  |
| WBGene00015146 | <i>abi-1</i>      | CBG08994                    | 3                | Inf                                 | Unambiguous reciprocal BLAST | Supported by synteny     | Confirmed by Treefam     | Different Phenotype  |
| WBGene00004857 | <i>sma-3</i>      | CBG16541                    | 3                | Inf                                 | Unambiguous reciprocal BLAST | Not supported by synteny | Confirmed by Treefam     | Different Phenotype  |
| WBGene00004450 | <i>rpl-36</i>     | CBG08350                    | 3                | 66.42596873                         | Unambiguous reciprocal BLAST | Supported by synteny     | Confirmed by Treefam     | Different Phenotype  |
| WBGene00019400 | <i>K04G7.1</i>    | CBG16609                    | 3                | Inf                                 | Unambiguous reciprocal BLAST | Supported by synteny     | Not confirmed by Treefam | Different Phenotype  |
| WBGene00017358 | <i>F10E9.7</i>    | CBG16641                    | 3                | 41.80163235                         | Unambiguous reciprocal BLAST | Supported by synteny     | Not confirmed by Treefam | Different Phenotype  |
| WBGene00019455 | <i>K06H7.1</i>    | CBG09232                    | 3                | 76.52287875                         | Unambiguous reciprocal BLAST | Not supported by synteny | Not confirmed by Treefam | Different Phenotype  |
| WBGene00004201 | <i>prx-19</i>     | CBG06892                    | 3                | 161.8573325                         | Unambiguous reciprocal BLAST | Supported by synteny     | Confirmed by Treefam     | Different Phenotype  |
| WBGene00014229 | <i>ZK1128.3</i>   | CBG09871                    | 3                | 136.0511525                         | Unambiguous reciprocal BLAST | Supported by synteny     | Not confirmed by Treefam | Different Phenotype  |
| WBGene00004735 | <i>sbp-1</i>      | CBG13284                    | 3                | Inf                                 | Unambiguous reciprocal BLAST | Supported by synteny     | Confirmed by Treefam     | Different Phenotype  |
| WBGene00004705 | <i>rsp-8</i>      | CBG13299                    | 3                | 47.30103                            | Unambiguous reciprocal BLAST | Supported by synteny     | Confirmed by Treefam     | Different Phenotype  |
| WBGene00004700 | <i>rsp-3</i>      | CBG03563                    | 3                | 21.77815125                         | Unambiguous reciprocal BLAST | Supported by synteny     | Confirmed by Treefam     | Different Phenotype  |
| WBGene00018144 | <i>F37C4.4</i>    | CBG10738                    | 3                | 151.1303338                         | Unambiguous reciprocal BLAST | Supported by synteny     | Confirmed by Treefam     | Different Phenotype  |
| WBGene00000817 | <i>csn-5</i>      | CBG19889                    | 3                | Inf                                 | Unambiguous reciprocal BLAST | Not supported by synteny | Confirmed by Treefam     | Different Phenotype  |
| WBGene00004374 | <i>rme-2</i>      | CBG03794                    | 3                | Inf                                 | Unambiguous reciprocal BLAST | Not supported by synteny | Confirmed by Treefam     | Different Phenotype  |
| WBGene00002152 | <i>iars-1</i>     | CBG23754                    | 3                | Inf                                 | Unambiguous reciprocal BLAST | Supported by synteny     | Not confirmed by Treefam | Different Phenotype  |
| WBGene00012704 | <i>Y39C12A.1</i>  | CBG06255                    | 3                | 88.77815125                         | Unambiguous reciprocal BLAST | Supported by synteny     | Confirmed by Treefam     | Different Phenotype  |
| WBGene00012885 | <i>Y45F10D.4</i>  | CBG22375                    | 3                | 93.17609126                         | Unambiguous reciprocal BLAST | Supported by synteny     | Confirmed by Treefam     | Different Phenotype  |
| WBGene00021365 | <i>smgl-2</i>     | CBG08291                    | 3                | Inf                                 | Unambiguous reciprocal BLAST | Supported by synteny     | Confirmed by Treefam     | Different Phenotype  |
| WBGene00020705 | <i>T22H9.1</i>    | CBG01378                    | 3                | 178.7781513                         | Unambiguous reciprocal BLAST | Supported by synteny     | Confirmed by Treefam     | Different Phenotype  |
| WBGene00003159 | <i>mcm-7</i>      | CBG21868                    | 3                | Inf                                 | Unambiguous reciprocal BLAST | Supported by synteny     | Confirmed by Treefam     | Different Phenotype  |
| WBGene00017769 | <i>F25B4.6</i>    | CBG09344                    | 3                | Inf                                 | Unambiguous reciprocal BLAST | Supported by synteny     | Confirmed by Treefam     | Different Phenotype  |
| WBGene00001345 | <i>fos-1</i>      | CBG09268                    | 3                | 113                                 | Unambiguous reciprocal BLAST | Supported by synteny     | Confirmed by Treefam     | Different Phenotype  |
| WBGene00018492 | <i>F46E10.11</i>  | CBG18960                    | 3                | 96.60205999                         | Unambiguous reciprocal BLAST | Supported by synteny     | Confirmed by Treefam     | Different Phenotype  |
| WBGene00011538 | <i>T06E6.1</i>    | CBG05554                    | 3                | Inf                                 | Unambiguous reciprocal BLAST | Not supported by synteny | Confirmed by Treefam     | Different Phenotype  |
| WBGene00013585 | <i>cyp-42A1</i>   | CBG20323                    | 3                | Inf                                 | Unambiguous reciprocal BLAST | Supported by synteny     | Confirmed by Treefam     | Different Phenotype  |
| WBGene00004786 | <i>sex-1</i>      | CBG17178                    | 3                | 103.39794                           | Unambiguous reciprocal BLAST | Supported by synteny     | Confirmed by Treefam     | Different Phenotype  |
| WBGene00004271 | <i>rab-7</i>      | CBG20853                    | 3                | 115.4259687                         | Unambiguous reciprocal BLAST | Supported by synteny     | Confirmed by Treefam     | Different Phenotype  |
| WBGene00004430 | <i>rpl-18</i>     | CBG22372                    | 3                | 118.845098                          | Unambiguous reciprocal BLAST | Supported by synteny     | Confirmed by Treefam     | Different Phenotype  |
| WBGene00017982 | <i>F32D1.2</i>    | CBG21867                    | 3                | 27.79835464                         | Unambiguous reciprocal BLAST | Supported by synteny     | Not confirmed by Treefam | Different Phenotype  |
| WBGene00004197 | <i>prx-12</i>     | CBG17349                    | 3                | Inf                                 | Unambiguous reciprocal BLAST | Supported by synteny     | Confirmed by Treefam     | Different Phenotype  |

|                |                  |          |   |     |             |                                |                          |                          |                     |
|----------------|------------------|----------|---|-----|-------------|--------------------------------|--------------------------|--------------------------|---------------------|
| WBGene00009259 | <i>F29G6.3</i>   | CBG17311 | 3 | Inf |             | Unambiguous reciprocal BLAST   | Supported by synteny     | Not confirmed by Treefam | Different Phenotype |
| WBGene00001465 | <i>flr-1</i>     | CBG05329 | 3 | Inf |             | Unambiguous reciprocal BLAST   | Not supported by synteny | Confirmed by Treefam     | Different Phenotype |
| WBGene00009626 | <i>F42A8.1</i>   | CBG00873 | 3 | Inf |             | Unambiguous reciprocal BLAST   | Supported by synteny     | Confirmed by Treefam     | Different Phenotype |
| WBGene00001086 | <i>dpy-27</i>    | CBG20143 | 3 | Inf |             | Unambiguous reciprocal BLAST   | Not supported by synteny | Confirmed by Treefam     | Different Phenotype |
| WBGene00000255 | <i>bli-5</i>     | CBG21218 | 3 |     | 110.5228787 | Unambiguous reciprocal BLAST   | Not supported by synteny | Not confirmed by Treefam | Different Phenotype |
| WBGene00017853 | <i>F27C1.3</i>   | CBG12311 | 2 |     | 11.69897    | Possible alternative BLAST hit | Supported by synteny     | Confirmed by Treefam     | Different Phenotype |
| WBGene00000254 | <i>bli-4</i>     | CBG12593 | 2 |     | 0           | Possible alternative BLAST hit | Supported by synteny     | Confirmed by Treefam     | Different Phenotype |
| WBGene00000079 | <i>adr-1</i>     | CBG19440 | 2 |     | 0           | Possible alternative BLAST hit | Supported by synteny     | Confirmed by Treefam     | Different Phenotype |
| WBGene00000156 | <i>apr-1</i>     | CBG08224 | 2 |     | 0           | Possible alternative BLAST hit | Supported by synteny     | Confirmed by Treefam     | Different Phenotype |
| WBGene00001979 | <i>hmp-2</i>     | CBG19745 | 2 |     | 0           | Possible alternative BLAST hit | Supported by synteny     | Confirmed by Treefam     | Different Phenotype |
| WBGene00016020 | <i>sptl-1</i>    | CBG06999 | 2 |     | 0           | Possible alternative BLAST hit | Supported by synteny     | Confirmed by Treefam     | Different Phenotype |
| WBGene00008166 | <i>saps-1</i>    | CBG02933 | 2 |     | 0           | Possible alternative BLAST hit | Supported by synteny     | Confirmed by Treefam     | Different Phenotype |
| WBGene00003651 | <i>nhr-61</i>    | CBG04240 | 2 |     | 0           | Possible alternative BLAST hit | Supported by synteny     | Confirmed by Treefam     | Different Phenotype |
| WBGene00012803 | <i>Y43F4B.5</i>  | CBG03574 | 2 |     | 0           | Possible alternative BLAST hit | Supported by synteny     | Confirmed by Treefam     | Different Phenotype |
| WBGene00006914 | <i>vha-5</i>     | CBG01592 | 2 |     | 0           | Possible alternative BLAST hit | Supported by synteny     | Confirmed by Treefam     | Different Phenotype |
| WBGene00021626 | <i>Y47D7A.14</i> | CBG24582 | 2 |     | 0           | Possible alternative BLAST hit | Supported by synteny     | Confirmed by Treefam     | Different Phenotype |
| WBGene00008670 | <i>F11A3.2</i>   | CBG19294 | 2 |     | 0           | Possible alternative BLAST hit | Supported by synteny     | Confirmed by Treefam     | Different Phenotype |
| WBGene00004855 | <i>sma-1</i>     | CBG23326 | 2 |     | 0           | Possible alternative BLAST hit | Supported by synteny     | Confirmed by Treefam     | Different Phenotype |
| WBGene00004951 | <i>spc-1</i>     | CBG14139 | 2 |     | 0           | Possible alternative BLAST hit | Supported by synteny     | Confirmed by Treefam     | Different Phenotype |
| WBGene00022201 | <i>Y71H10B.1</i> | CBG02038 | 2 |     | 0           | Possible alternative BLAST hit | Supported by synteny     | Confirmed by Treefam     | Different Phenotype |
| WBGene00001824 | <i>hbl-1</i>     | CBG14758 | 2 |     | 0           | Possible alternative BLAST hit | Supported by synteny     | Confirmed by Treefam     | Different Phenotype |
| WBGene00004194 | <i>prx-5</i>     | CBG11123 | 2 |     | 0           | Possible alternative BLAST hit | Supported by synteny     | Confirmed by Treefam     | Different Phenotype |
| WBGene00000675 | <i>col-101</i>   | CBG22542 | 2 |     | 0           | Possible alternative BLAST hit | Supported by synteny     | Confirmed by Treefam     | Different Phenotype |
| WBGene00009880 | <i>F49C12.11</i> | CBG21705 | 2 |     | 13.36172784 | Possible alternative BLAST hit | Supported by synteny     | Confirmed by Treefam     | Different Phenotype |
| WBGene00001130 | <i>dyn-1</i>     | CBG07725 | 2 |     | 0           | Possible alternative BLAST hit | Supported by synteny     | Confirmed by Treefam     | Different Phenotype |
| WBGene00001980 | <i>hmr-1</i>     | CBG07964 | 1 |     | 0           | Possible alternative BLAST hit | Not supported by synteny | Confirmed by Treefam     | Different Phenotype |
| WBGene00021468 | <i>epg-2</i>     | CBG03878 | 1 |     | 19.47712125 | Possible alternative BLAST hit | Supported by synteny     | Not confirmed by Treefam | Different Phenotype |
| WBGene00003044 | <i>lir-1</i>     | CBG13028 | 1 |     | 10.82390874 | Possible alternative BLAST hit | Supported by synteny     | Not confirmed by Treefam | Different Phenotype |
| WBGene00001974 | <i>hmg-4</i>     | CBG09136 | 1 |     | 0           | Possible alternative BLAST hit | Supported by synteny     | Not confirmed by Treefam | Different Phenotype |
| WBGene00006428 | <i>tag-49</i>    | CBG19991 | 1 |     | 0           | Possible alternative BLAST hit | Not supported by synteny | Confirmed by Treefam     | Different Phenotype |
| WBGene00016721 | <i>C46G7.1</i>   | CBG09471 | 1 |     | 0           | Possible alternative BLAST hit | Supported by synteny     | Not confirmed by Treefam | Different Phenotype |
| WBGene00003210 | <i>mel-28</i>    | CBG17984 | 1 |     | 0           | Possible alternative BLAST hit | Not supported by synteny | Confirmed by Treefam     | Different Phenotype |
| WBGene00004418 | <i>rpl-7</i>     | CBG03905 | 3 |     | 175.0791812 | Unambiguous reciprocal BLAST   | Supported by synteny     | Confirmed by Treefam     |                     |
| WBGene00002077 | <i>imb-3</i>     | CBG22062 | 3 | Inf |             | Unambiguous reciprocal BLAST   | Supported by synteny     | Confirmed by Treefam     |                     |
| WBGene00020915 | <i>noi-5</i>     | CBG14983 | 3 | Inf |             | Unambiguous reciprocal BLAST   | Supported by synteny     | Confirmed by Treefam     |                     |
| WBGene00004077 | <i>pop-1</i>     | CBG04236 | 3 |     | 116.9542425 | Unambiguous reciprocal BLAST   | Not supported by synteny | Confirmed by Treefam     |                     |
| WBGene00021270 | <i>Y23H5A.3</i>  | CBG14989 | 3 |     | 177.8624721 | Unambiguous reciprocal BLAST   | Supported by synteny     | Confirmed by Treefam     |                     |
| WBGene00017735 | <i>F23C8.6</i>   | CBG03984 | 3 |     | 131.39794   | Unambiguous reciprocal BLAST   | Supported by synteny     | Confirmed by Treefam     |                     |
| WBGene00019698 | <i>riok-1</i>    | CBG04203 | 3 | Inf |             | Unambiguous reciprocal BLAST   | Supported by synteny     | Confirmed by Treefam     |                     |
| WBGene00003062 | <i>lpd-6</i>     | CBG04177 | 3 | Inf |             | Unambiguous reciprocal BLAST   | Not supported by synteny | Not confirmed by Treefam |                     |
| WBGene00020190 | <i>T03F1.8</i>   | CBG11972 | 3 |     | 119.39794   | Unambiguous reciprocal BLAST   | Supported by synteny     | Confirmed by Treefam     |                     |
| WBGene00019362 | <i>cdk-2</i>     | CBG14952 | 3 | Inf |             | Unambiguous reciprocal BLAST   | Supported by synteny     | Confirmed by Treefam     |                     |
| WBGene00016837 | <i>C50F2.3</i>   | CBG11979 | 3 | Inf |             | Unambiguous reciprocal BLAST   | Supported by synteny     | Confirmed by Treefam     |                     |
| WBGene00001832 | <i>hcp-4</i>     | CBG11973 | 3 |     | 60.23044892 | Unambiguous reciprocal BLAST   | Supported by synteny     | Not confirmed by Treefam |                     |
| WBGene00003797 | <i>npp-11</i>    | CBG12010 | 3 |     | 169.154902  | Unambiguous reciprocal BLAST   | Supported by synteny     | Confirmed by Treefam     |                     |
| WBGene00004425 | <i>rpl-13</i>    | CBG12003 | 3 |     | 142.243038  | Unambiguous reciprocal BLAST   | Supported by synteny     | Confirmed by Treefam     |                     |
| WBGene00003950 | <i>pbs-4</i>     | CBG12037 | 3 |     | 131         | Unambiguous reciprocal BLAST   | Supported by synteny     | Confirmed by Treefam     |                     |
| WBGene00001231 | <i>elf-3.H</i>   | CBG04003 | 3 | Inf |             | Unambiguous reciprocal BLAST   | Supported by synteny     | Confirmed by Treefam     |                     |
| WBGene00007001 | <i>tufm-2</i>    | CBG12179 | 3 | Inf |             | Unambiguous reciprocal BLAST   | Supported by synteny     | Confirmed by Treefam     |                     |
| WBGene00017086 | <i>E01A2.4</i>   | CBG12065 | 3 |     | 136.1760913 | Unambiguous reciprocal BLAST   | Supported by synteny     | Confirmed by Treefam     |                     |
| WBGene00003061 | <i>lpd-5</i>     | CBG23930 | 3 |     | 119.5563025 | Unambiguous reciprocal BLAST   | Supported by synteny     | Confirmed by Treefam     |                     |
| WBGene00000779 | <i>cpn-3</i>     | CBG12084 | 3 |     | 51.52287875 | Unambiguous reciprocal BLAST   | Supported by synteny     | Confirmed by Treefam     |                     |
| WBGene00000140 | <i>anc-1</i>     | CBG12190 | 3 | Inf |             | Unambiguous reciprocal BLAST   | Supported by synteny     | Confirmed by Treefam     |                     |
| WBGene00004464 | <i>rpn-8</i>     | CBG12090 | 3 | Inf |             | Unambiguous reciprocal BLAST   | Supported by synteny     | Not confirmed by Treefam |                     |
| WBGene00016607 | <i>C43E11.9</i>  | CBG12182 | 3 |     | 131.6734159 | Unambiguous reciprocal BLAST   | Not supported by synteny | Confirmed by Treefam     |                     |
| WBGene00002694 | <i>let-502</i>   | CBG03960 | 3 | Inf |             | Unambiguous reciprocal BLAST   | Supported by synteny     | Confirmed by Treefam     |                     |
| WBGene00004436 | <i>rpl-24.1</i>  | CBG22273 | 3 |     | 81          | Unambiguous reciprocal BLAST   | Supported by synteny     | Confirmed by Treefam     |                     |
| WBGene00004415 | <i>rpl-4</i>     | CBG22235 | 3 | Inf |             | Unambiguous reciprocal BLAST   | Supported by synteny     | Confirmed by Treefam     |                     |
| WBGene00004479 | <i>rps-10</i>    | CBG22274 | 3 |     | 100.8293038 | Unambiguous reciprocal BLAST   | Supported by synteny     | Confirmed by Treefam     |                     |
| WBGene00018797 | <i>F54D7.2</i>   | CBG03950 | 3 | Inf |             | Unambiguous reciprocal BLAST   | Supported by synteny     | Confirmed by Treefam     |                     |

|                |                   |          |       |             |                              |                          |                          |
|----------------|-------------------|----------|-------|-------------|------------------------------|--------------------------|--------------------------|
| WBGene00018909 | <i>slx-1</i>      | CBG23741 | 3     | 129.3891661 | Unambiguous reciprocal BLAST | Supported by synteny     | Confirmed by Treefam     |
| WBGene00003221 | <i>mes-3</i>      | CBG10773 | 3     | 31.47712125 | Unambiguous reciprocal BLAST | Supported by synteny     | Confirmed by Treefam     |
| WBGene00000502 | <i>chp-1</i>      | CBG10812 | 3 Inf |             | Unambiguous reciprocal BLAST | Supported by synteny     | Confirmed by Treefam     |
| WBGene00015091 | <i>B0261.1</i>    | CBG12854 | 3 Inf |             | Unambiguous reciprocal BLAST | Supported by synteny     | Confirmed by Treefam     |
| WBGene00003132 | <i>mat-1</i>      | CBG10827 | 3 Inf |             | Unambiguous reciprocal BLAST | Supported by synteny     | Confirmed by Treefam     |
| WBGene00022460 | <i>use-1</i>      | CBG10814 | 3     | 110.90309   | Unambiguous reciprocal BLAST | Supported by synteny     | Confirmed by Treefam     |
| WBGene00018866 | <i>F55A12.8</i>   | CBG12327 | 3 Inf |             | Unambiguous reciprocal BLAST | Supported by synteny     | Confirmed by Treefam     |
| WBGene00017855 | <i>F27C1.6</i>    | CBG12310 | 3 Inf |             | Unambiguous reciprocal BLAST | Supported by synteny     | Confirmed by Treefam     |
| WBGene00022464 | <i>Y110A7A.19</i> | CBG23745 | 3     |             | Unambiguous reciprocal BLAST | Not supported by synteny | Confirmed by Treefam     |
| WBGene00004955 | <i>spd-5</i>      | CBG23743 | 3 Inf |             | Unambiguous reciprocal BLAST | Supported by synteny     | Confirmed by Treefam     |
| WBGene00022458 | <i>Y110A7A.8</i>  | CBG10828 | 3 Inf |             | Unambiguous reciprocal BLAST | Supported by synteny     | Confirmed by Treefam     |
| WBGene00020263 | <i>T05E8.3</i>    | CBG12480 | 3 Inf |             | Unambiguous reciprocal BLAST | Not supported by synteny | Confirmed by Treefam     |
| WBGene00015175 | <i>srz-4</i>      | CBG04062 | 3     | 57.60205999 | Unambiguous reciprocal BLAST | Supported by synteny     | Not confirmed by Treefam |
| WBGene00003793 | <i>npp-7</i>      | CBG14918 | 3 Inf |             | Unambiguous reciprocal BLAST | Supported by synteny     | Confirmed by Treefam     |
| WBGene00019076 | <i>F59A3.3</i>    | CBG12482 | 3 Inf |             | Unambiguous reciprocal BLAST | Supported by synteny     | Confirmed by Treefam     |
| WBGene00004505 | <i>rpt-5</i>      | CBG12876 | 3 Inf |             | Unambiguous reciprocal BLAST | Supported by synteny     | Confirmed by Treefam     |
| WBGene00019693 | <i>ostd-1</i>     | CBG14887 | 3     | 159.6283889 | Unambiguous reciprocal BLAST | Supported by synteny     | Confirmed by Treefam     |
| WBGene00006919 | <i>vha-10</i>     | CBG14904 | 3     | 82.77815125 | Unambiguous reciprocal BLAST | Supported by synteny     | Confirmed by Treefam     |
| WBGene00020558 | <i>T19B4.5</i>    | CBG14914 | 3     | 179.5185139 | Unambiguous reciprocal BLAST | Supported by synteny     | Confirmed by Treefam     |
| WBGene00004431 | <i>rpl-19</i>     | CBG12479 | 3     | 138.2130748 | Unambiguous reciprocal BLAST | Supported by synteny     | Confirmed by Treefam     |
| WBGene00018891 | <i>F55F8.3</i>    | CBG14923 | 3 Inf |             | Unambiguous reciprocal BLAST | Supported by synteny     | Confirmed by Treefam     |
| WBGene00020383 | <i>T09B4.9</i>    | CBG12550 | 3 Inf |             | Unambiguous reciprocal BLAST | Supported by synteny     | Confirmed by Treefam     |
| WBGene00020348 | <i>T08B2.8</i>    | CBG12563 | 3     | 104.559308  | Unambiguous reciprocal BLAST | Supported by synteny     | Confirmed by Treefam     |
| WBGene00015499 | <i>C06A5.1</i>    | CBG22096 | 3 Inf |             | Unambiguous reciprocal BLAST | Supported by synteny     | Confirmed by Treefam     |
| WBGene00003059 | <i>lpd-2</i>      | CBG12576 | 3     | 169.2086205 | Unambiguous reciprocal BLAST | Supported by synteny     | Confirmed by Treefam     |
| WBGene00003878 | <i>pept-3</i>     | CBG20288 | 3 Inf |             | Unambiguous reciprocal BLAST | Supported by synteny     | Confirmed by Treefam     |
| WBGene00004486 | <i>rps-17</i>     | CBG12566 | 3     | 89.09691001 | Unambiguous reciprocal BLAST | Supported by synteny     | Confirmed by Treefam     |
| WBGene00019005 | <i>F57B10.8</i>   | CBG12662 | 3     | 125.1139434 | Unambiguous reciprocal BLAST | Not supported by synteny | Confirmed by Treefam     |
| WBGene00020417 | <i>nuo-2</i>      | CBG12670 | 3 Inf |             | Unambiguous reciprocal BLAST | Not supported by synteny | Confirmed by Treefam     |
| WBGene00018156 | <i>ncbp-1</i>     | CBG12621 | 3 Inf |             | Unambiguous reciprocal BLAST | Supported by synteny     | Confirmed by Treefam     |
| WBGene00016944 | <i>uri-1</i>      | CBG04072 | 3     | 175.69897   | Unambiguous reciprocal BLAST | Not supported by synteny | Confirmed by Treefam     |
| WBGene00022591 | <i>cuti-1</i>     | CBG12615 | 3     | 109.5882717 | Unambiguous reciprocal BLAST | Supported by synteny     | Confirmed by Treefam     |
| WBGene00019432 | <i>knf-2</i>      | CBG12632 | 3 Inf |             | Unambiguous reciprocal BLAST | Supported by synteny     | Not confirmed by Treefam |
| WBGene00006773 | <i>unc-37</i>     | CBG04050 | 3 Inf |             | Unambiguous reciprocal BLAST | Supported by synteny     | Confirmed by Treefam     |
| WBGene00002257 | <i>lbp-5</i>      | CBG12714 | 3     | 23.24303805 | Unambiguous reciprocal BLAST | Supported by synteny     | Confirmed by Treefam     |
| WBGene00016740 | <i>C48B6.2</i>    | CBG12733 | 3     | 118.1249387 | Unambiguous reciprocal BLAST | Supported by synteny     | Confirmed by Treefam     |
| WBGene00003815 | <i>nars-1</i>     | CBG20478 | 3 Inf |             | Unambiguous reciprocal BLAST | Supported by synteny     | Confirmed by Treefam     |
| WBGene00019322 | <i>ahcy-1</i>     | CBG12756 | 3 Inf |             | Unambiguous reciprocal BLAST | Supported by synteny     | Confirmed by Treefam     |
| WBGene00009051 | <i>nduf-6</i>     | CBG20477 | 3     | 97.7201593  | Unambiguous reciprocal BLAST | Supported by synteny     | Confirmed by Treefam     |
| WBGene00012166 | <i>nuo-6</i>      | CBG10781 | 3     | 125.6127839 | Unambiguous reciprocal BLAST | Supported by synteny     | Confirmed by Treefam     |
| WBGene00009052 | <i>ekl-1</i>      | CBG20475 | 3 Inf |             | Unambiguous reciprocal BLAST | Supported by synteny     | Confirmed by Treefam     |
| WBGene00001648 | <i>goa-1</i>      | CBG24698 | 3 Inf |             | Unambiguous reciprocal BLAST | Not supported by synteny | Confirmed by Treefam     |
| WBGene00001949 | <i>hjh-2</i>      | CBG21941 | 3     | 101.4771213 | Unambiguous reciprocal BLAST | Supported by synteny     | Confirmed by Treefam     |
| WBGene00007042 | <i>pbrm-1</i>     | CBG11867 | 3 Inf |             | Unambiguous reciprocal BLAST | Supported by synteny     | Confirmed by Treefam     |
| WBGene00009004 | <i>pf4-6</i>      | CBG21902 | 3     | 64.54406804 | Unambiguous reciprocal BLAST | Supported by synteny     | Confirmed by Treefam     |
| WBGene00009915 | <i>F52A8.1</i>    | CBG11905 | 3     | 54.82390874 | Unambiguous reciprocal BLAST | Supported by synteny     | Confirmed by Treefam     |
| WBGene00009254 | <i>capp-1</i>     | CBG11864 | 3 Inf |             | Unambiguous reciprocal BLAST | Not supported by synteny | Confirmed by Treefam     |
| WBGene00008990 | <i>smgl-1</i>     | CBG08249 | 3 Inf |             | Unambiguous reciprocal BLAST | Supported by synteny     | Confirmed by Treefam     |
| WBGene00010560 | <i>jftb-1</i>     | CBG08214 | 3     | 132.69897   | Unambiguous reciprocal BLAST | Supported by synteny     | Confirmed by Treefam     |
| WBGene00010562 | <i>cdc-48.3</i>   | CBG08216 | 3 Inf |             | Unambiguous reciprocal BLAST | Supported by synteny     | Confirmed by Treefam     |
| WBGene00009141 | <i>ncbp-2</i>     | CBG22194 | 3     | 49.04575749 | Unambiguous reciprocal BLAST | Supported by synteny     | Confirmed by Treefam     |
| WBGene00012030 | <i>T25G3.3</i>    | CBG11892 | 3 Inf |             | Unambiguous reciprocal BLAST | Supported by synteny     | Confirmed by Treefam     |
| WBGene00001595 | <i>gld-1</i>      | CBG00303 | 3 Inf |             | Unambiguous reciprocal BLAST | Supported by synteny     | Confirmed by Treefam     |
| WBGene00006386 | <i>taf-5</i>      | CBG23733 | 3 Inf |             | Unambiguous reciprocal BLAST | Supported by synteny     | Confirmed by Treefam     |
| WBGene00008413 | <i>D2030.3</i>    | CBG11961 | 3 Inf |             | Unambiguous reciprocal BLAST | Not supported by synteny | Confirmed by Treefam     |
| WBGene00001647 | <i>gna-2</i>      | CBG19292 | 3 Inf |             | Unambiguous reciprocal BLAST | Supported by synteny     | Confirmed by Treefam     |
| WBGene00008414 | <i>D2030.4</i>    | CBG11960 | 3     | 86.94816836 | Unambiguous reciprocal BLAST | Supported by synteny     | Confirmed by Treefam     |
| WBGene00000869 | <i>cyc-1</i>      | CBG08212 | 3 Inf |             | Unambiguous reciprocal BLAST | Supported by synteny     | Confirmed by Treefam     |
| WBGene00004439 | <i>rpl-25.2</i>   | CBG04080 | 3     | 22          | Unambiguous reciprocal BLAST | Supported by synteny     | Confirmed by Treefam     |
| WBGene00003788 | <i>npp-2</i>      | CBG04087 | 3 Inf |             | Unambiguous reciprocal BLAST | Supported by synteny     | Confirmed by Treefam     |

|                |                  |          |       |             |                              |                          |                          |
|----------------|------------------|----------|-------|-------------|------------------------------|--------------------------|--------------------------|
| WBGene00006844 | <i>unc-120</i>   | CBG12542 | 3     | 167.60206   | Unambiguous reciprocal BLAST | Supported by synteny     | Confirmed by Treefam     |
| WBGene00002196 | <i>kin-10</i>    | CBG04088 | 3     | 157.1326256 | Unambiguous reciprocal BLAST | Supported by synteny     | Confirmed by Treefam     |
| WBGene00008386 | <i>D1081.8</i>   | CBG12532 | 3 Inf |             | Unambiguous reciprocal BLAST | Supported by synteny     | Confirmed by Treefam     |
| WBGene00013958 | <i>ZK265.6</i>   | CBG24963 | 3     | 103.4259687 | Unambiguous reciprocal BLAST | Supported by synteny     | Confirmed by Treefam     |
| WBGene00010496 | <i>sec-12</i>    | CBG12530 | 3 Inf |             | Unambiguous reciprocal BLAST | Supported by synteny     | Confirmed by Treefam     |
| WBGene00012116 | <i>del-4</i>     | CBG00319 | 3 Inf |             | Unambiguous reciprocal BLAST | Not supported by synteny | Not confirmed by Treefam |
| WBGene00003925 | <i>pas-4</i>     | CBG12349 | 3     | 127.845098  | Unambiguous reciprocal BLAST | Supported by synteny     | Confirmed by Treefam     |
| WBGene00007972 | <i>prp-4</i>     | CBG12355 | 3 Inf |             | Unambiguous reciprocal BLAST | Supported by synteny     | Confirmed by Treefam     |
| WBGene00009671 | <i>mfap-1</i>    | CBG12497 | 3 Inf |             | Unambiguous reciprocal BLAST | Supported by synteny     | Confirmed by Treefam     |
| WBGene00009454 | <i>F36A2.7</i>   | CBG12375 | 3     | 30.6180481  | Unambiguous reciprocal BLAST | Supported by synteny     | Not confirmed by Treefam |
| WBGene00009342 | <i>fasn-1</i>    | CBG12408 | 3 Inf |             | Unambiguous reciprocal BLAST | Supported by synteny     | Confirmed by Treefam     |
| WBGene00003052 | <i>lmn-1</i>     | CBG12363 | 3 Inf |             | Unambiguous reciprocal BLAST | Supported by synteny     | Confirmed by Treefam     |
| WBGene00009664 | <i>F43G9.1</i>   | CBG12504 | 3 Inf |             | Unambiguous reciprocal BLAST | Supported by synteny     | Confirmed by Treefam     |
| WBGene00009672 | <i>F43G9.12</i>  | CBG12496 | 3     |             | Unambiguous reciprocal BLAST | Supported by synteny     | Confirmed by Treefam     |
| WBGene00007971 | <i>rpb-3</i>     | CBG12350 | 3 Inf |             | Unambiguous reciprocal BLAST | Supported by synteny     | Confirmed by Treefam     |
| WBGene00004953 | <i>spd-2</i>     | CBG12404 | 3 Inf |             | Unambiguous reciprocal BLAST | Supported by synteny     | Not confirmed by Treefam |
| WBGene00004484 | <i>rps-15</i>    | CBG12376 | 3     | 105.544068  | Unambiguous reciprocal BLAST | Supported by synteny     | Confirmed by Treefam     |
| WBGene00003953 | <i>pbs-7</i>     | CBG12343 | 3     | 123.30103   | Unambiguous reciprocal BLAST | Supported by synteny     | Confirmed by Treefam     |
| WBGene00008781 | <i>F14B4.3</i>   | CBG19469 | 3 Inf |             | Unambiguous reciprocal BLAST | Supported by synteny     | Confirmed by Treefam     |
| WBGene00007646 | <i>nkb-1</i>     | CBG03745 | 3 Inf |             | Unambiguous reciprocal BLAST | Supported by synteny     | Confirmed by Treefam     |
| WBGene00009266 | <i>F30A10.9</i>  | CBG24495 | 3     | 123.7781513 | Unambiguous reciprocal BLAST | Supported by synteny     | Confirmed by Treefam     |
| WBGene00009477 | <i>tag-214</i>   | CBG12417 | 3 Inf |             | Unambiguous reciprocal BLAST | Supported by synteny     | Confirmed by Treefam     |
| WBGene00008061 | <i>C41G7.3</i>   | CBG24491 | 3     | 45.17609126 | Unambiguous reciprocal BLAST | Supported by synteny     | Not confirmed by Treefam |
| WBGene00008107 | <i>aspm-1</i>    | CBG09326 | 3 Inf |             | Unambiguous reciprocal BLAST | Not supported by synteny | Confirmed by Treefam     |
| WBGene00000371 | <i>cco-1</i>     | CBG03796 | 3     | 93.78612018 | Unambiguous reciprocal BLAST | Supported by synteny     | Confirmed by Treefam     |
| WBGene00006352 | <i>sur-6</i>     | CBG03807 | 3 Inf |             | Unambiguous reciprocal BLAST | Supported by synteny     | Confirmed by Treefam     |
| WBGene00004426 | <i>rpl-14</i>    | CBG03771 | 3     | 83.38021124 | Unambiguous reciprocal BLAST | Supported by synteny     | Confirmed by Treefam     |
| WBGene00004312 | <i>rba-1</i>     | CBG03711 | 3 Inf |             | Unambiguous reciprocal BLAST | Supported by synteny     | Confirmed by Treefam     |
| WBGene00003036 | <i>lin-53</i>    | CBG03710 | 3 Inf |             | Unambiguous reciprocal BLAST | Supported by synteny     | Confirmed by Treefam     |
| WBGene00009159 | <i>F26E4.4</i>   | CBG03802 | 3     | 158.8846066 | Unambiguous reciprocal BLAST | Supported by synteny     | Not confirmed by Treefam |
| WBGene00004437 | <i>rpl-24.2</i>  | CBG03702 | 3     | 103         | Unambiguous reciprocal BLAST | Supported by synteny     | Confirmed by Treefam     |
| WBGene00006379 | <i>sys-1</i>     | CBG03820 | 3 Inf |             | Unambiguous reciprocal BLAST | Supported by synteny     | Not confirmed by Treefam |
| WBGene00003000 | <i>lin-11</i>    | CBG12236 | 3 Inf |             | Unambiguous reciprocal BLAST | Not supported by synteny | Confirmed by Treefam     |
| WBGene00001226 | <i>elf-3.C</i>   | CBG03821 | 3     |             | Unambiguous reciprocal BLAST | Supported by synteny     | Confirmed by Treefam     |
| WBGene00004476 | <i>rps-7</i>     | CBG21343 | 3     | 136.4819201 | Unambiguous reciprocal BLAST | Supported by synteny     | Confirmed by Treefam     |
| WBGene00000843 | <i>cup-2</i>     | CBG02198 | 3     | 155.39794   | Unambiguous reciprocal BLAST | Supported by synteny     | Confirmed by Treefam     |
| WBGene00003397 | <i>mom-5</i>     | CBG03824 | 3 Inf |             | Unambiguous reciprocal BLAST | Supported by synteny     | Confirmed by Treefam     |
| WBGene00011944 | <i>T23D8.3</i>   | CBG03822 | 3 Inf |             | Unambiguous reciprocal BLAST | Supported by synteny     | Confirmed by Treefam     |
| WBGene00003803 | <i>npp-17</i>    | CBG03784 | 3 Inf |             | Unambiguous reciprocal BLAST | Supported by synteny     | Confirmed by Treefam     |
| WBGene00016393 | <i>C34B2.8</i>   | CBG12806 | 3     | 116.071882  | Unambiguous reciprocal BLAST | Supported by synteny     | Confirmed by Treefam     |
| WBGene00009118 | <i>F25H2.4</i>   | CBG02246 | 3     | 108.39794   | Unambiguous reciprocal BLAST | Not supported by synteny | Confirmed by Treefam     |
| WBGene00009122 | <i>tct-1</i>     | CBG02259 | 3     | 126.4771213 | Unambiguous reciprocal BLAST | Supported by synteny     | Confirmed by Treefam     |
| WBGene00003926 | <i>pas-5</i>     | CBG02261 | 3     | 134.154902  | Unambiguous reciprocal BLAST | Supported by synteny     | Confirmed by Treefam     |
| WBGene00044321 | <i>tag-264</i>   | CBG12459 | 3 Inf |             | Unambiguous reciprocal BLAST | Supported by synteny     | Confirmed by Treefam     |
| WBGene00010326 | <i>F59C6.5</i>   | CBG02223 | 3 Inf |             | Unambiguous reciprocal BLAST | Supported by synteny     | Confirmed by Treefam     |
| WBGene00018849 | <i>F55A3.3</i>   | CBG12204 | 3 Inf |             | Unambiguous reciprocal BLAST | Supported by synteny     | Not confirmed by Treefam |
| WBGene00013128 | <i>Y52B11A.9</i> | CBG23783 | 3 Inf |             | Unambiguous reciprocal BLAST | Supported by synteny     | Confirmed by Treefam     |
| WBGene00013605 | <i>Y95D11A.1</i> | CBG20410 | 3     | 66.30103    | Unambiguous reciprocal BLAST | Supported by synteny     | Confirmed by Treefam     |
| WBGene00018625 | <i>prp-17</i>    | CBG20408 | 3 Inf |             | Unambiguous reciprocal BLAST | Supported by synteny     | Confirmed by Treefam     |
| WBGene00012950 | <i>Y47H9C.7</i>  | CBG15840 | 3 Inf |             | Unambiguous reciprocal BLAST | Not supported by synteny | Confirmed by Treefam     |
| WBGene00006707 | <i>ubc-12</i>    | CBG18691 | 3     | 25.69897    | Unambiguous reciprocal BLAST | Supported by synteny     | Confirmed by Treefam     |
| WBGene00007603 | <i>C15C6.4</i>   | CBG23842 | 3     | 111.3891661 | Unambiguous reciprocal BLAST | Supported by synteny     | Confirmed by Treefam     |
| WBGene00003921 | <i>par-6</i>     | CBG08713 | 3 Inf |             | Unambiguous reciprocal BLAST | Supported by synteny     | Confirmed by Treefam     |
| WBGene00006889 | <i>pf1-3</i>     | CBG13600 | 3     | 113.4983106 | Unambiguous reciprocal BLAST | Supported by synteny     | Confirmed by Treefam     |
| WBGene00012484 | <i>car-1</i>     | CBG07987 | 3 Inf |             | Unambiguous reciprocal BLAST | Supported by synteny     | Confirmed by Treefam     |
| WBGene00003989 | <i>pfn-1</i>     | CBG04366 | 3     | 26.14612804 | Unambiguous reciprocal BLAST | Supported by synteny     | Confirmed by Treefam     |
| WBGene00003948 | <i>pbs-2</i>     | CBG07938 | 3 Inf |             | Unambiguous reciprocal BLAST | Supported by synteny     | Confirmed by Treefam     |
| WBGene00006700 | <i>uba-2</i>     | CBG13604 | 3 Inf |             | Unambiguous reciprocal BLAST | Supported by synteny     | Confirmed by Treefam     |
| WBGene00001746 | <i>gsk-3</i>     | CBG07972 | 3     |             | Unambiguous reciprocal BLAST | Supported by synteny     | Confirmed by Treefam     |
| WBGene00007215 | <i>C01A2.3</i>   | CBG20396 | 3 Inf |             | Unambiguous reciprocal BLAST | Supported by synteny     | Confirmed by Treefam     |

|                |                   |          |   |             |                              |                          |                          |
|----------------|-------------------|----------|---|-------------|------------------------------|--------------------------|--------------------------|
| WBGene00012735 | <i>spft-3</i>     | CBG20386 | 3 | 70.69897    | Unambiguous reciprocal BLAST | Not supported by synteny | Confirmed by Treefam     |
| WBGene00013021 | <i>Y48G10A.4</i>  | CBG08018 | 3 | Inf         | Unambiguous reciprocal BLAST | Supported by synteny     | Not confirmed by Treefam |
| WBGene00004915 | <i>snr-2</i>      | CBG20368 | 3 | 67.57403127 | Unambiguous reciprocal BLAST | Supported by synteny     | Confirmed by Treefam     |
| WBGene00006595 | <i>top-1</i>      | CBG20349 | 3 | Inf         | Unambiguous reciprocal BLAST | Supported by synteny     | Confirmed by Treefam     |
| WBGene00006936 | <i>vars-2</i>     | CBG08035 | 3 | Inf         | Unambiguous reciprocal BLAST | Supported by synteny     | Confirmed by Treefam     |
| WBGene00013598 | <i>vps-28</i>     | CBG19782 | 3 | 141.7269987 | Unambiguous reciprocal BLAST | Supported by synteny     | Confirmed by Treefam     |
| WBGene00007217 | <i>C01A2.5</i>    | CBG20397 | 3 | 161.30103   | Unambiguous reciprocal BLAST | Not supported by synteny | Confirmed by Treefam     |
| WBGene00004489 | <i>rps-20</i>     | CBG08754 | 3 | 79.50514998 | Unambiguous reciprocal BLAST | Supported by synteny     | Confirmed by Treefam     |
| WBGene00006382 | <i>taf-1</i>      | CBG13620 | 3 | Inf         | Unambiguous reciprocal BLAST | Supported by synteny     | Confirmed by Treefam     |
| WBGene00009825 | <i>F47G4.4</i>    | CBG18869 | 3 | Inf         | Unambiguous reciprocal BLAST | Supported by synteny     | Confirmed by Treefam     |
| WBGene00006565 | <i>tfg-1</i>      | CBG18822 | 3 | 125.60206   | Unambiguous reciprocal BLAST | Supported by synteny     | Confirmed by Treefam     |
| WBGene00013406 | <i>Y63D3A.7</i>   | CBG18827 | 3 | 55.09691001 | Unambiguous reciprocal BLAST | Supported by synteny     | Confirmed by Treefam     |
| WBGene00009368 | <i>F33H2.5</i>    | CBG19758 | 3 | Inf         | Unambiguous reciprocal BLAST | Supported by synteny     | Confirmed by Treefam     |
| WBGene00000158 | <i>apg-1</i>      | CBG08748 | 3 | Inf         | Unambiguous reciprocal BLAST | Supported by synteny     | Confirmed by Treefam     |
| WBGene00002324 | <i>let-49</i>     | CBG19704 | 3 | 117.3424227 | Unambiguous reciprocal BLAST | Supported by synteny     | Confirmed by Treefam     |
| WBGene00010766 | <i>K11B4.1</i>    | CBG19712 | 3 | Inf         | Unambiguous reciprocal BLAST | Supported by synteny     | Confirmed by Treefam     |
| WBGene00009287 | <i>F31C3.5</i>    | CBG19768 | 3 | 102.1398791 | Unambiguous reciprocal BLAST | Not supported by synteny | Confirmed by Treefam     |
| WBGene00009369 | <i>F33H2.6</i>    | CBG19724 | 3 | 149.0791812 | Unambiguous reciprocal BLAST | Supported by synteny     | Confirmed by Treefam     |
| WBGene00004495 | <i>rps-26</i>     | CBG19764 | 3 | 69.11394335 | Unambiguous reciprocal BLAST | Supported by synteny     | Confirmed by Treefam     |
| WBGene00000888 | <i>aex-5</i>      | CBG19714 | 3 | Inf         | Unambiguous reciprocal BLAST | Supported by synteny     | Confirmed by Treefam     |
| WBGene00001030 | <i>dnj-12</i>     | CBG19766 | 3 | Inf         | Unambiguous reciprocal BLAST | Supported by synteny     | Confirmed by Treefam     |
| WBGene00003951 | <i>pbs-5</i>      | CBG19741 | 3 | Inf         | Unambiguous reciprocal BLAST | Supported by synteny     | Confirmed by Treefam     |
| WBGene00010579 | <i>K05C4.2</i>    | CBG19742 | 3 | 130.4548449 | Unambiguous reciprocal BLAST | Supported by synteny     | Confirmed by Treefam     |
| WBGene00002047 | <i>icp-1</i>      | CBG03880 | 3 | 144.69897   | Unambiguous reciprocal BLAST | Supported by synteny     | Confirmed by Treefam     |
| WBGene00021334 | <i>vps-4</i>      | CBG22083 | 3 | Inf         | Unambiguous reciprocal BLAST | Supported by synteny     | Confirmed by Treefam     |
| WBGene00021466 | <i>Y39G10AR.8</i> | CBG03884 | 3 | Inf         | Unambiguous reciprocal BLAST | Supported by synteny     | Confirmed by Treefam     |
| WBGene00003156 | <i>mcm-4</i>      | CBG03890 | 3 | Inf         | Unambiguous reciprocal BLAST | Not supported by synteny | Confirmed by Treefam     |
| WBGene00004978 | <i>spg-7</i>      | CBG14947 | 3 | Inf         | Unambiguous reciprocal BLAST | Not supported by synteny | Confirmed by Treefam     |
| WBGene00022025 | <i>Y65B4A.1</i>   | CBG18539 | 3 | 24.30103    | Unambiguous reciprocal BLAST | Supported by synteny     | Not confirmed by Treefam |
| WBGene00021638 | <i>Y47G6A.9</i>   | CBG14946 | 3 | 88.68124124 | Unambiguous reciprocal BLAST | Supported by synteny     | Confirmed by Treefam     |
| WBGene00021843 | <i>Y54E10BR.4</i> | CBG04192 | 3 | Inf         | Unambiguous reciprocal BLAST | Supported by synteny     | Confirmed by Treefam     |
| WBGene00021845 | <i>rpb-7</i>      | CBG04195 | 3 | 117.9330532 | Unambiguous reciprocal BLAST | Supported by synteny     | Confirmed by Treefam     |
| WBGene00000794 | <i>crn-1</i>      | CBG14945 | 3 | Inf         | Unambiguous reciprocal BLAST | Supported by synteny     | Confirmed by Treefam     |
| WBGene00000413 | <i>cdt-1</i>      | CBG14978 | 3 | Inf         | Unambiguous reciprocal BLAST | Supported by synteny     | Confirmed by Treefam     |
| WBGene00021829 | <i>Y54E10A.7</i>  | CBG04173 | 3 | 121.3117539 | Unambiguous reciprocal BLAST | Supported by synteny     | Confirmed by Treefam     |
| WBGene00002079 | <i>xpo-2</i>      | CBG22063 | 3 | Inf         | Unambiguous reciprocal BLAST | Supported by synteny     | Confirmed by Treefam     |
| WBGene00004920 | <i>snr-7</i>      | CBG04114 | 3 | 31          | Unambiguous reciprocal BLAST | Supported by synteny     | Confirmed by Treefam     |
| WBGene00003080 | <i>lsm-6</i>      | CBG22150 | 3 | 34.87506126 | Unambiguous reciprocal BLAST | Supported by synteny     | Confirmed by Treefam     |
| WBGene00022119 | <i>Y71F9AL.17</i> | CBG04223 | 3 | Inf         | Unambiguous reciprocal BLAST | Not supported by synteny | Confirmed by Treefam     |
| WBGene00017746 | <i>F23F1.5</i>    | CBG07011 | 3 | Inf         | Unambiguous reciprocal BLAST | Supported by synteny     | Confirmed by Treefam     |
| WBGene00000497 | <i>chs-2</i>      | CBG06966 | 3 | Inf         | Unambiguous reciprocal BLAST | Supported by synteny     | Confirmed by Treefam     |
| WBGene00020796 | <i>T25D3.2</i>    | CBG06974 | 3 | Inf         | Unambiguous reciprocal BLAST | Supported by synteny     | Confirmed by Treefam     |
| WBGene00015185 | <i>mrpl-41</i>    | CBG07017 | 3 | 111.7781513 | Unambiguous reciprocal BLAST | Supported by synteny     | Confirmed by Treefam     |
| WBGene00021073 | <i>not-1</i>      | CBG07065 | 3 | Inf         | Unambiguous reciprocal BLAST | Supported by synteny     | Confirmed by Treefam     |
| WBGene00004188 | <i>prp-21</i>     | CBG07063 | 3 | Inf         | Unambiguous reciprocal BLAST | Supported by synteny     | Confirmed by Treefam     |
| WBGene00021095 | <i>mlt-8</i>      | CBG07073 | 3 | Inf         | Unambiguous reciprocal BLAST | Supported by synteny     | Not confirmed by Treefam |
| WBGene00021133 | <i>tomm-22</i>    | CBG07066 | 3 | 64.77815125 | Unambiguous reciprocal BLAST | Supported by synteny     | Confirmed by Treefam     |
| WBGene00021074 | <i>W07E6.2</i>    | CBG07064 | 3 | Inf         | Unambiguous reciprocal BLAST | Supported by synteny     | Confirmed by Treefam     |
| WBGene00017210 | <i>F07E5.5</i>    | CBG20443 | 3 | 173         | Unambiguous reciprocal BLAST | Not supported by synteny | Confirmed by Treefam     |
| WBGene00017280 | <i>F09D1.1</i>    | CBG04341 | 3 | Inf         | Unambiguous reciprocal BLAST | Not supported by synteny | Confirmed by Treefam     |
| WBGene00017245 | <i>F08D12.1</i>   | CBG19592 | 3 | Inf         | Unambiguous reciprocal BLAST | Supported by synteny     | Confirmed by Treefam     |
| WBGene00021292 | <i>Y25C1A.5</i>   | CBG19635 | 3 | Inf         | Unambiguous reciprocal BLAST | Supported by synteny     | Confirmed by Treefam     |
| WBGene00021715 | <i>Y49F6B.2</i>   | CBG17763 | 3 | 134.2552725 | Unambiguous reciprocal BLAST | Supported by synteny     | Confirmed by Treefam     |
| WBGene00004467 | <i>rpn-11</i>     | CBG23950 | 3 | Inf         | Unambiguous reciprocal BLAST | Supported by synteny     | Confirmed by Treefam     |
| WBGene00019220 | <i>pf4-2</i>      | CBG03668 | 3 | 71.75587486 | Unambiguous reciprocal BLAST | Supported by synteny     | Confirmed by Treefam     |
| WBGene00022739 | <i>toe-1</i>      | CBG03684 | 3 | Inf         | Unambiguous reciprocal BLAST | Supported by synteny     | Confirmed by Treefam     |
| WBGene00015297 | <i>sco-1</i>      | CBG03655 | 3 | Inf         | Unambiguous reciprocal BLAST | Supported by synteny     | Confirmed by Treefam     |
| WBGene00006497 | <i>tag-151</i>    | CBG04291 | 3 | Inf         | Unambiguous reciprocal BLAST | Supported by synteny     | Confirmed by Treefam     |
| WBGene00001438 | <i>fkh-6</i>      | CBG03678 | 3 | 142.9420081 | Unambiguous reciprocal BLAST | Supported by synteny     | Confirmed by Treefam     |
| WBGene00022742 | <i>ZK430.7</i>    | CBG03683 | 3 | Inf         | Unambiguous reciprocal BLAST | Supported by synteny     | Confirmed by Treefam     |

|                |                 |          |   |     |             |                              |                          |                          |
|----------------|-----------------|----------|---|-----|-------------|------------------------------|--------------------------|--------------------------|
| WBGene00018016 | <i>lrr-1</i>    | CBG02302 | 3 | Inf |             | Unambiguous reciprocal BLAST | Supported by synteny     | Confirmed by Treefam     |
| WBGene00020866 | <i>T27F7.1</i>  | CBG02295 | 3 |     | 118.30103   | Unambiguous reciprocal BLAST | Supported by synteny     | Confirmed by Treefam     |
| WBGene00016163 | <i>C27D9.1</i>  | CBG20621 | 3 | Inf |             | Unambiguous reciprocal BLAST | Not supported by synteny | Confirmed by Treefam     |
| WBGene00003949 | <i>pbs-3</i>    | CBG02289 | 3 |     | 139.4771213 | Unambiguous reciprocal BLAST | Supported by synteny     | Confirmed by Treefam     |
| WBGene00004434 | <i>rpl-22</i>   | CBG02309 | 3 |     | 65.47712125 | Unambiguous reciprocal BLAST | Supported by synteny     | Confirmed by Treefam     |
| WBGene00007012 | <i>mdt-2</i>    | CBG02282 | 3 |     | 165.3802112 | Unambiguous reciprocal BLAST | Not supported by synteny | Not confirmed by Treefam |
| WBGene00018270 | <i>F41C3.4</i>  | CBG20627 | 3 |     | 32.07918125 | Unambiguous reciprocal BLAST | Not supported by synteny | Not confirmed by Treefam |
| WBGene00002068 | <i>ffy-1</i>    | CBG02465 | 3 |     | 75.96108193 | Unambiguous reciprocal BLAST | Not supported by synteny | Confirmed by Treefam     |
| WBGene00017289 | <i>F09E5.11</i> | CBG02376 | 3 |     | 139.7403627 | Unambiguous reciprocal BLAST | Supported by synteny     | Confirmed by Treefam     |
| WBGene00001511 | <i>fzy-1</i>    | CBG02417 | 3 | Inf |             | Unambiguous reciprocal BLAST | Supported by synteny     | Confirmed by Treefam     |
| WBGene00017282 | <i>F09E5.2</i>  | CBG02380 | 3 | Inf |             | Unambiguous reciprocal BLAST | Supported by synteny     | Confirmed by Treefam     |
| WBGene00000969 | <i>dhs-5</i>    | CBG02403 | 3 | Inf |             | Unambiguous reciprocal BLAST | Supported by synteny     | Confirmed by Treefam     |
| WBGene00004034 | <i>pkc-3</i>    | CBG02381 | 3 | Inf |             | Unambiguous reciprocal BLAST | Supported by synteny     | Confirmed by Treefam     |
| WBGene00017132 | <i>mel-47</i>   | CBG02394 | 3 | Inf |             | Unambiguous reciprocal BLAST | Supported by synteny     | Not confirmed by Treefam |
| WBGene00015941 | <i>C18A3.3</i>  | CBG02485 | 3 |     | 162.7160033 | Unambiguous reciprocal BLAST | Not supported by synteny | Confirmed by Treefam     |
| WBGene00006933 | <i>vps-35</i>   | CBG02534 | 3 | Inf |             | Unambiguous reciprocal BLAST | Not supported by synteny | Confirmed by Treefam     |
| WBGene00006988 | <i>zyg-1</i>    | CBG02462 | 3 | Inf |             | Unambiguous reciprocal BLAST | Supported by synteny     | Confirmed by Treefam     |
| WBGene00001509 | <i>fzo-1</i>    | CBG02514 | 3 | Inf |             | Unambiguous reciprocal BLAST | Supported by synteny     | Confirmed by Treefam     |
| WBGene00019268 | <i>H41C03.1</i> | CBG02523 | 3 | Inf |             | Unambiguous reciprocal BLAST | Supported by synteny     | Confirmed by Treefam     |
| WBGene00016319 | <i>C32D5.12</i> | CBG02636 | 3 | Inf |             | Unambiguous reciprocal BLAST | Supported by synteny     | Not confirmed by Treefam |
| WBGene00003009 | <i>lin-23</i>   | CBG02640 | 3 | Inf |             | Unambiguous reciprocal BLAST | Supported by synteny     | Confirmed by Treefam     |
| WBGene00017683 | <i>F21H12.1</i> | CBG02573 | 3 | Inf |             | Unambiguous reciprocal BLAST | Supported by synteny     | Confirmed by Treefam     |
| WBGene00016243 | <i>tag-319</i>  | CBG02591 | 3 | Inf |             | Unambiguous reciprocal BLAST | Supported by synteny     | Confirmed by Treefam     |
| WBGene00004015 | <i>phb-2</i>    | CBG02605 | 3 | Inf |             | Unambiguous reciprocal BLAST | Supported by synteny     | Confirmed by Treefam     |
| WBGene00016245 | <i>C30B5.4</i>  | CBG02589 | 3 | Inf |             | Unambiguous reciprocal BLAST | Supported by synteny     | Confirmed by Treefam     |
| WBGene00017895 | <i>vrk-1</i>    | CBG02540 | 3 | Inf |             | Unambiguous reciprocal BLAST | Supported by synteny     | Confirmed by Treefam     |
| WBGene00002045 | <i>icd-1</i>    | CBG04320 | 3 |     | 112.146128  | Unambiguous reciprocal BLAST | Supported by synteny     | Confirmed by Treefam     |
| WBGene00004916 | <i>snr-3</i>    | CBG02671 | 3 |     | 48.60205999 | Unambiguous reciprocal BLAST | Supported by synteny     | Confirmed by Treefam     |
| WBGene00016961 | <i>vps-32.1</i> | CBG04319 | 3 |     | 31.69897    | Unambiguous reciprocal BLAST | Supported by synteny     | Not confirmed by Treefam |
| WBGene00016968 | <i>egg-5</i>    | CBG04313 | 3 | Inf |             | Unambiguous reciprocal BLAST | Supported by synteny     | Confirmed by Treefam     |
| WBGene00020499 | <i>T14B4.2</i>  | CBG11219 | 3 |     | 76.45593196 | Unambiguous reciprocal BLAST | Supported by synteny     | Confirmed by Treefam     |
| WBGene00017348 | <i>F10E7.6</i>  | CBG13069 | 3 |     | 67.36797679 | Unambiguous reciprocal BLAST | Supported by synteny     | Not confirmed by Treefam |
| WBGene00022852 | <i>ZK1127.5</i> | CBG11211 | 3 | Inf |             | Unambiguous reciprocal BLAST | Supported by synteny     | Confirmed by Treefam     |
| WBGene00020166 | <i>T02G5.7</i>  | CBG24740 | 3 | Inf |             | Unambiguous reciprocal BLAST | Supported by synteny     | Confirmed by Treefam     |
| WBGene00022851 | <i>ZK1127.4</i> | CBG11215 | 3 |     | 148.2552725 | Unambiguous reciprocal BLAST | Supported by synteny     | Confirmed by Treefam     |
| WBGene00004447 | <i>rpl-33</i>   | CBG13066 | 3 |     | 81.54406804 | Unambiguous reciprocal BLAST | Supported by synteny     | Confirmed by Treefam     |
| WBGene00000390 | <i>cdc-42</i>   | CBG13013 | 3 |     | 38.30103    | Unambiguous reciprocal BLAST | Supported by synteny     | Confirmed by Treefam     |
| WBGene00003813 | <i>nrf-6</i>    | CBG13350 | 3 | Inf |             | Unambiguous reciprocal BLAST | Supported by synteny     | Confirmed by Treefam     |
| WBGene00015515 | <i>spdl-1</i>   | CBG19326 | 3 |     | 173.5622929 | Unambiguous reciprocal BLAST | Not supported by synteny | Not confirmed by Treefam |
| WBGene00011638 | <i>ostb-1</i>   | CBG03302 | 3 | Inf |             | Unambiguous reciprocal BLAST | Supported by synteny     | Confirmed by Treefam     |
| WBGene00006996 | <i>zyg-11</i>   | CBG13353 | 3 | Inf |             | Unambiguous reciprocal BLAST | Supported by synteny     | Confirmed by Treefam     |
| WBGene00011350 | <i>T01H3.4</i>  | CBG03297 | 3 | Inf |             | Unambiguous reciprocal BLAST | Supported by synteny     | Not confirmed by Treefam |
| WBGene00007433 | <i>C08B11.3</i> | CBG13351 | 3 | Inf |             | Unambiguous reciprocal BLAST | Supported by synteny     | Confirmed by Treefam     |
| WBGene00007014 | <i>mdt-10</i>   | CBG03308 | 3 |     | 79.92081875 | Unambiguous reciprocal BLAST | Supported by synteny     | Confirmed by Treefam     |
| WBGene00015513 | <i>C06A8.2</i>  | CBG12959 | 3 |     | 152.8239087 | Unambiguous reciprocal BLAST | Supported by synteny     | Confirmed by Treefam     |
| WBGene00004723 | <i>sap-49</i>   | CBG13349 | 3 | Inf |             | Unambiguous reciprocal BLAST | Supported by synteny     | Confirmed by Treefam     |
| WBGene00017546 | <i>rpa-1</i>    | CBG13026 | 3 | Inf |             | Unambiguous reciprocal BLAST | Supported by synteny     | Confirmed by Treefam     |
| WBGene00011637 | <i>T09A5.9</i>  | CBG03304 | 3 |     | 111.544068  | Unambiguous reciprocal BLAST | Supported by synteny     | Confirmed by Treefam     |
| WBGene00011634 | <i>T09A5.5</i>  | CBG03309 | 3 |     | 113.3424227 | Unambiguous reciprocal BLAST | Supported by synteny     | Not confirmed by Treefam |
| WBGene00007434 | <i>C08B11.6</i> | CBG13348 | 3 | Inf |             | Unambiguous reciprocal BLAST | Supported by synteny     | Confirmed by Treefam     |
| WBGene00006913 | <i>vha-4</i>    | CBG03298 | 3 |     | 109.60206   | Unambiguous reciprocal BLAST | Supported by synteny     | Confirmed by Treefam     |
| WBGene00004264 | <i>qua-1</i>    | CBG00717 | 3 |     | 153.30103   | Unambiguous reciprocal BLAST | Supported by synteny     | Confirmed by Treefam     |
| WBGene00001498 | <i>fars-3</i>   | CBG00621 | 3 | Inf |             | Unambiguous reciprocal BLAST | Supported by synteny     | Confirmed by Treefam     |
| WBGene00006994 | <i>zyg-9</i>    | CBG00620 | 3 | Inf |             | Unambiguous reciprocal BLAST | Supported by synteny     | Confirmed by Treefam     |
| WBGene00000379 | <i>cct-4</i>    | CBG00674 | 3 | Inf |             | Unambiguous reciprocal BLAST | Supported by synteny     | Confirmed by Treefam     |
| WBGene00010948 | <i>M195.2</i>   | CBG00704 | 3 |     | 163.69897   | Unambiguous reciprocal BLAST | Supported by synteny     | Confirmed by Treefam     |
| WBGene00008640 | <i>F10B5.3</i>  | CBG00742 | 3 | Inf |             | Unambiguous reciprocal BLAST | Supported by synteny     | Confirmed by Treefam     |
| WBGene00011759 | <i>T13H5.5</i>  | CBG04747 | 3 |     | 173         | Unambiguous reciprocal BLAST | Supported by synteny     | Confirmed by Treefam     |
| WBGene00007744 | <i>C26D10.3</i> | CBG00693 | 3 | Inf |             | Unambiguous reciprocal BLAST | Supported by synteny     | Confirmed by Treefam     |
| WBGene00004304 | <i>ran-3</i>    | CBG00692 | 3 | Inf |             | Unambiguous reciprocal BLAST | Not supported by synteny | Confirmed by Treefam     |

|                |                  |          |   |     |             |                              |                      |                          |  |
|----------------|------------------|----------|---|-----|-------------|------------------------------|----------------------|--------------------------|--|
| WBGene00000377 | <i>cct-1</i>     | CBG00721 | 3 | Inf |             | Unambiguous reciprocal BLAST | Supported by synteny | Confirmed by Treefam     |  |
| WBGene00011758 | <i>T13H5.4</i>   | CBG04748 | 3 | Inf |             | Unambiguous reciprocal BLAST | Supported by synteny | Confirmed by Treefam     |  |
| WBGene00003821 | <i>nst-1</i>     | CBG00673 | 3 | Inf |             | Unambiguous reciprocal BLAST | Supported by synteny | Confirmed by Treefam     |  |
| WBGene00006739 | <i>ulp-4</i>     | CBG00748 | 3 | Inf |             | Unambiguous reciprocal BLAST | Supported by synteny | Confirmed by Treefam     |  |
| WBGene00001281 | <i>emb-27</i>    | CBG00731 | 3 | Inf |             | Unambiguous reciprocal BLAST | Supported by synteny | Confirmed by Treefam     |  |
| WBGene00010044 | <i>F54C9.9</i>   | CBG00558 | 3 | Inf |             | Unambiguous reciprocal BLAST | Supported by synteny | Confirmed by Treefam     |  |
| WBGene00009207 | <i>F28C6.8</i>   | CBG00545 | 3 | Inf | 85.47712125 | Unambiguous reciprocal BLAST | Supported by synteny | Confirmed by Treefam     |  |
| WBGene00006059 | <i>stc-1</i>     | CBG00564 | 3 | Inf |             | Unambiguous reciprocal BLAST | Supported by synteny | Confirmed by Treefam     |  |
| WBGene00000187 | <i>arl-1</i>     | CBG00557 | 3 | Inf | 54.30103    | Unambiguous reciprocal BLAST | Supported by synteny | Confirmed by Treefam     |  |
| WBGene00008428 | <i>D2085.3</i>   | CBG00512 | 3 | Inf |             | Unambiguous reciprocal BLAST | Supported by synteny | Confirmed by Treefam     |  |
| WBGene00011885 | <i>T21B10.3</i>  | CBG03215 | 3 | Inf |             | Unambiguous reciprocal BLAST | Supported by synteny | Confirmed by Treefam     |  |
| WBGene00004397 | <i>rol-6</i>     | CBG03154 | 3 | Inf |             | Unambiguous reciprocal BLAST | Supported by synteny | Confirmed by Treefam     |  |
| WBGene00000773 | <i>cpf-1</i>     | CBG00548 | 3 | Inf |             | Unambiguous reciprocal BLAST | Supported by synteny | Confirmed by Treefam     |  |
| WBGene00004440 | <i>rpl-26</i>    | CBG00547 | 3 | Inf | 27.24303805 | Unambiguous reciprocal BLAST | Supported by synteny | Confirmed by Treefam     |  |
| WBGene00011883 | <i>T21B10.1</i>  | CBG03213 | 3 | Inf | 170.7558749 | Unambiguous reciprocal BLAST | Supported by synteny | Confirmed by Treefam     |  |
| WBGene00011311 | <i>T01B7.5</i>   | CBG03160 | 3 | Inf |             | Unambiguous reciprocal BLAST | Supported by synteny | Confirmed by Treefam     |  |
| WBGene00004416 | <i>rpl-5</i>     | CBG00561 | 3 | Inf |             | Unambiguous reciprocal BLAST | Supported by synteny | Confirmed by Treefam     |  |
| WBGene00000615 | <i>col-38</i>    | CBG00562 | 3 | Inf | 77.47712125 | Unambiguous reciprocal BLAST | Supported by synteny | Confirmed by Treefam     |  |
| WBGene00011768 | <i>oac-46</i>    | CBG03197 | 3 | Inf |             | Unambiguous reciprocal BLAST | Supported by synteny | Confirmed by Treefam     |  |
| WBGene00004174 | <i>pqn-95</i>    | CBG00905 | 3 | Inf | 127.9208188 | Unambiguous reciprocal BLAST | Supported by synteny | Confirmed by Treefam     |  |
| WBGene00000286 | <i>cal-2</i>     | CBG03220 | 3 | Inf | 47.65321251 | Unambiguous reciprocal BLAST | Supported by synteny | Confirmed by Treefam     |  |
| WBGene00001134 | <i>eat-3</i>     | CBG20228 | 3 | Inf |             | Unambiguous reciprocal BLAST | Supported by synteny | Confirmed by Treefam     |  |
| WBGene00006433 | <i>sdhb-1</i>    | CBG00872 | 3 | Inf |             | Unambiguous reciprocal BLAST | Supported by synteny | Confirmed by Treefam     |  |
| WBGene00012000 | <i>T24H10.1</i>  | CBG03263 | 3 | Inf |             | Unambiguous reciprocal BLAST | Supported by synteny | Confirmed by Treefam     |  |
| WBGene00007683 | <i>C18E9.2</i>   | CBG03222 | 3 | Inf | 171.0280287 | Unambiguous reciprocal BLAST | Supported by synteny | Confirmed by Treefam     |  |
| WBGene00007684 | <i>C18E9.4</i>   | CBG03221 | 3 | Inf | 70.57403127 | Unambiguous reciprocal BLAST | Supported by synteny | Confirmed by Treefam     |  |
| WBGene00001229 | <i>eif-3.F</i>   | CBG20226 | 3 | Inf | 116.5740313 | Unambiguous reciprocal BLAST | Supported by synteny | Confirmed by Treefam     |  |
| WBGene00009711 | <i>F44G4.1</i>   | CBG03232 | 3 | Inf |             | Unambiguous reciprocal BLAST | Supported by synteny | Confirmed by Treefam     |  |
| WBGene00007686 | <i>tomm-40</i>   | CBG03225 | 3 | Inf |             | Unambiguous reciprocal BLAST | Supported by synteny | Confirmed by Treefam     |  |
| WBGene00009505 | <i>F37B12.3</i>  | CBG03250 | 3 | Inf | 134.7596678 | Unambiguous reciprocal BLAST | Supported by synteny | Confirmed by Treefam     |  |
| WBGene00013143 | <i>Y53C12B.1</i> | CBG01041 | 3 | Inf |             | Unambiguous reciprocal BLAST | Supported by synteny | Confirmed by Treefam     |  |
| WBGene00008455 | <i>E02H1.1</i>   | CBG00961 | 3 | Inf |             | Unambiguous reciprocal BLAST | Supported by synteny | Confirmed by Treefam     |  |
| WBGene00013144 | <i>Y53C12B.2</i> | CBG01042 | 3 | Inf |             | Unambiguous reciprocal BLAST | Supported by synteny | Confirmed by Treefam     |  |
| WBGene00013140 | <i>mop-25.2</i>  | CBG01052 | 3 | Inf |             | Unambiguous reciprocal BLAST | Supported by synteny | Confirmed by Treefam     |  |
| WBGene00006940 | <i>wee-1.3</i>   | CBG01053 | 3 | Inf |             | Unambiguous reciprocal BLAST | Supported by synteny | Confirmed by Treefam     |  |
| WBGene00002497 | <i>let-268</i>   | CBG13377 | 3 | Inf |             | Unambiguous reciprocal BLAST | Supported by synteny | Confirmed by Treefam     |  |
| WBGene00003939 | <i>pax-3</i>     | CBG00861 | 3 | Inf | 111.39794   | Unambiguous reciprocal BLAST | Supported by synteny | Confirmed by Treefam     |  |
| WBGene00011334 | <i>T01E8.6</i>   | CBG20218 | 3 | Inf | 69.44715803 | Unambiguous reciprocal BLAST | Supported by synteny | Confirmed by Treefam     |  |
| WBGene00000995 | <i>die-1</i>     | CBG02697 | 3 | Inf |             | Unambiguous reciprocal BLAST | Supported by synteny | Confirmed by Treefam     |  |
| WBGene00011273 | <i>R53.4</i>     | CBG01005 | 3 | Inf | 108.0413927 | Unambiguous reciprocal BLAST | Supported by synteny | Confirmed by Treefam     |  |
| WBGene00001207 | <i>egl-43</i>    | CBG01007 | 3 | Inf |             | Unambiguous reciprocal BLAST | Supported by synteny | Confirmed by Treefam     |  |
| WBGene00009364 | <i>F33H1.3</i>   | CBG00888 | 3 | Inf | 169.0457575 | Unambiguous reciprocal BLAST | Supported by synteny | Confirmed by Treefam     |  |
| WBGene00011275 | <i>R53.6</i>     | CBG01004 | 3 | Inf | 135.39794   | Unambiguous reciprocal BLAST | Supported by synteny | Confirmed by Treefam     |  |
| WBGene00007413 | <i>pro-2</i>     | CBG02729 | 3 | Inf |             | Unambiguous reciprocal BLAST | Supported by synteny | Confirmed by Treefam     |  |
| WBGene00010015 | <i>atad-3</i>    | CBG18727 | 3 | Inf |             | Unambiguous reciprocal BLAST | Supported by synteny | Confirmed by Treefam     |  |
| WBGene00004704 | <i>rsp-7</i>     | CBG03040 | 3 | Inf | 98.07918125 | Unambiguous reciprocal BLAST | Supported by synteny | Confirmed by Treefam     |  |
| WBGene00000933 | <i>dap-3</i>     | CBG03062 | 3 | Inf |             | Unambiguous reciprocal BLAST | Supported by synteny | Confirmed by Treefam     |  |
| WBGene00004185 | <i>pro-1</i>     | CBG03075 | 3 | Inf |             | Unambiguous reciprocal BLAST | Supported by synteny | Confirmed by Treefam     |  |
| WBGene00007412 | <i>stip-1</i>    | CBG02731 | 3 | Inf |             | Unambiguous reciprocal BLAST | Supported by synteny | Confirmed by Treefam     |  |
| WBGene00010896 | <i>M28.5</i>     | CBG03041 | 3 | Inf | 62.60205999 | Unambiguous reciprocal BLAST | Supported by synteny | Confirmed by Treefam     |  |
| WBGene00000798 | <i>crn-5</i>     | CBG03059 | 3 | Inf | 130.09691   | Unambiguous reciprocal BLAST | Supported by synteny | Confirmed by Treefam     |  |
| WBGene00011527 | <i>cchl-1</i>    | CBG02944 | 3 | Inf |             | Unambiguous reciprocal BLAST | Supported by synteny | Confirmed by Treefam     |  |
| WBGene00008256 | <i>glb-12</i>    | CBG03023 | 3 | Inf |             | Unambiguous reciprocal BLAST | Supported by synteny | Not confirmed by Treefam |  |
| WBGene00003367 | <i>mix-1</i>     | CBG03006 | 3 | Inf |             | Unambiguous reciprocal BLAST | Supported by synteny | Confirmed by Treefam     |  |
| WBGene00011067 | <i>vps-1</i>     | CBG03015 | 3 | Inf |             | Unambiguous reciprocal BLAST | Supported by synteny | Confirmed by Treefam     |  |
| WBGene00009353 | <i>sdhd-1</i>    | CBG02978 | 3 | Inf | 98.30103    | Unambiguous reciprocal BLAST | Supported by synteny | Confirmed by Treefam     |  |
| WBGene00000411 | <i>cdl-1</i>     | CBG03013 | 3 | Inf |             | Unambiguous reciprocal BLAST | Supported by synteny | Confirmed by Treefam     |  |
| WBGene00000293 | <i>cap-2</i>     | CBG03000 | 3 | Inf |             | Unambiguous reciprocal BLAST | Supported by synteny | Confirmed by Treefam     |  |
| WBGene00002957 | <i>let-858</i>   | CBG02984 | 3 | Inf |             | Unambiguous reciprocal BLAST | Supported by synteny | Confirmed by Treefam     |  |
| WBGene00003831 | <i>nuo-1</i>     | CBG02970 | 3 | Inf |             | Unambiguous reciprocal BLAST | Supported by synteny | Confirmed by Treefam     |  |

|                |                   |          |   |     |             |                              |                          |                          |
|----------------|-------------------|----------|---|-----|-------------|------------------------------|--------------------------|--------------------------|
| WBGene00011526 | <i>T06D8.5</i>    | CBG02945 | 3 | Inf |             | Unambiguous reciprocal BLAST | Supported by synteny     | Confirmed by Treefam     |
| WBGene00009701 | <i>egg-3</i>      | CBG20647 | 3 | Inf |             | Unambiguous reciprocal BLAST | Not supported by synteny | Confirmed by Treefam     |
| WBGene00004465 | <i>rpn-9</i>      | CBG02942 | 3 | Inf |             | Unambiguous reciprocal BLAST | Supported by synteny     | Confirmed by Treefam     |
| WBGene00012148 | <i>VF13D12L.1</i> | CBG03142 | 3 | Inf |             | Unambiguous reciprocal BLAST | Supported by synteny     | Confirmed by Treefam     |
| WBGene00010054 | <i>F54D5.11</i>   | CBG02864 | 3 | Inf |             | Unambiguous reciprocal BLAST | Supported by synteny     | Confirmed by Treefam     |
| WBGene00012204 | <i>W02B12.9</i>   | CBG02884 | 3 | Inf |             | Unambiguous reciprocal BLAST | Supported by synteny     | Confirmed by Treefam     |
| WBGene00008361 | <i>D1043.1</i>    | CBG02853 | 3 | Inf |             | Unambiguous reciprocal BLAST | Supported by synteny     | Confirmed by Treefam     |
| WBGene00007192 | <i>B0491.5</i>    | CBG02921 | 3 | Inf |             | Unambiguous reciprocal BLAST | Supported by synteny     | Confirmed by Treefam     |
| WBGene00009688 | <i>F44E5.1</i>    | CBG03126 | 3 | Inf | 33.1949766  | Unambiguous reciprocal BLAST | Supported by synteny     | Confirmed by Treefam     |
| WBGene00013267 | <i>Y57A10A.27</i> | CBG20930 | 3 | Inf | 174.9542425 | Unambiguous reciprocal BLAST | Supported by synteny     | Not confirmed by Treefam |
| WBGene00003789 | <i>npp-3</i>      | CBG02744 | 3 | Inf |             | Unambiguous reciprocal BLAST | Supported by synteny     | Confirmed by Treefam     |
| WBGene00001679 | <i>gpb-1</i>      | CBG03131 | 3 | Inf |             | Unambiguous reciprocal BLAST | Supported by synteny     | Confirmed by Treefam     |
| WBGene00014153 | <i>vab-23</i>     | CBG02749 | 3 | Inf | 131.1249387 | Unambiguous reciprocal BLAST | Supported by synteny     | Confirmed by Treefam     |
| WBGene00003154 | <i>mcm-2</i>      | CBG18436 | 3 | Inf |             | Unambiguous reciprocal BLAST | Not supported by synteny | Confirmed by Treefam     |
| WBGene00009661 | <i>patr-1</i>     | CBG03125 | 3 | Inf |             | Unambiguous reciprocal BLAST | Supported by synteny     | Not confirmed by Treefam |
| WBGene00009246 | <i>F29C12.4</i>   | CBG02783 | 3 | Inf |             | Unambiguous reciprocal BLAST | Supported by synteny     | Confirmed by Treefam     |
| WBGene00010266 | <i>dct-18</i>     | CBG02759 | 3 | Inf | 130.30103   | Unambiguous reciprocal BLAST | Not supported by synteny | Confirmed by Treefam     |
| WBGene00012602 | <i>Y38E10A.24</i> | CBG07913 | 3 | Inf | 38.22184875 | Unambiguous reciprocal BLAST | Supported by synteny     | Not confirmed by Treefam |
| WBGene00010267 | <i>lips-9</i>     | CBG02760 | 3 | Inf |             | Unambiguous reciprocal BLAST | Supported by synteny     | Confirmed by Treefam     |
| WBGene00013004 | <i>Y48E1B.5</i>   | CBG20758 | 3 | Inf |             | Unambiguous reciprocal BLAST | Supported by synteny     | Confirmed by Treefam     |
| WBGene00012984 | <i>Y48B6A.13</i>  | CBG20661 | 3 | Inf |             | Unambiguous reciprocal BLAST | Supported by synteny     | Confirmed by Treefam     |
| WBGene00012187 | <i>rpb-11</i>     | CBG20834 | 3 | Inf | 67.85387196 | Unambiguous reciprocal BLAST | Supported by synteny     | Confirmed by Treefam     |
| WBGene00012978 | <i>Y48B6A.1</i>   | CBG20902 | 3 | Inf |             | Unambiguous reciprocal BLAST | Not supported by synteny | Confirmed by Treefam     |
| WBGene00006964 | <i>xrn-2</i>      | CBG20900 | 3 | Inf |             | Unambiguous reciprocal BLAST | Supported by synteny     | Confirmed by Treefam     |
| WBGene00004456 | <i>rpl-43</i>     | CBG20901 | 3 | Inf | 57.65321251 | Unambiguous reciprocal BLAST | Supported by synteny     | Confirmed by Treefam     |
| WBGene00012230 | <i>cacn-1</i>     | CBG20998 | 3 | Inf |             | Unambiguous reciprocal BLAST | Supported by synteny     | Confirmed by Treefam     |
| WBGene00011043 | <i>R05H10.2</i>   | CBG20878 | 3 | Inf |             | Unambiguous reciprocal BLAST | Supported by synteny     | Confirmed by Treefam     |
| WBGene00013168 | <i>arp-1</i>      | CBG03145 | 3 | Inf |             | Unambiguous reciprocal BLAST | Not supported by synteny | Confirmed by Treefam     |
| WBGene00007999 | <i>tag-297</i>    | CBG11063 | 3 | Inf |             | Unambiguous reciprocal BLAST | Not supported by synteny | Not confirmed by Treefam |
| WBGene00001225 | <i>eif-3.B</i>    | CBG04247 | 3 | Inf |             | Unambiguous reciprocal BLAST | Supported by synteny     | Confirmed by Treefam     |
| WBGene00006381 | <i>tac-1</i>      | CBG04258 | 3 | Inf | 104.3853509 | Unambiguous reciprocal BLAST | Supported by synteny     | Not confirmed by Treefam |
| WBGene00021546 | <i>Y43H11AL.2</i> | CBG07028 | 3 | Inf |             | Unambiguous reciprocal BLAST | Supported by synteny     | Confirmed by Treefam     |
| WBGene00001793 | <i>gsy-1</i>      | CBG18401 | 3 | Inf |             | Unambiguous reciprocal BLAST | Supported by synteny     | Confirmed by Treefam     |
| WBGene00004166 | <i>pqn-85</i>     | CBG07027 | 3 | Inf |             | Unambiguous reciprocal BLAST | Supported by synteny     | Confirmed by Treefam     |
| WBGene00018782 | <i>cct-3</i>      | CBG21460 | 3 | Inf |             | Unambiguous reciprocal BLAST | Not supported by synteny | Confirmed by Treefam     |
| WBGene00017328 | <i>F10C5.2</i>    | CBG15202 | 3 | Inf |             | Unambiguous reciprocal BLAST | Supported by synteny     | Confirmed by Treefam     |
| WBGene00021061 | <i>W06E11.1</i>   | CBG15253 | 3 | Inf |             | Unambiguous reciprocal BLAST | Supported by synteny     | Confirmed by Treefam     |
| WBGene00006781 | <i>unc-45</i>     | CBG15283 | 3 | Inf |             | Unambiguous reciprocal BLAST | Supported by synteny     | Confirmed by Treefam     |
| WBGene00003931 | <i>pat-4</i>      | CBG15792 | 3 | Inf |             | Unambiguous reciprocal BLAST | Not supported by synteny | Confirmed by Treefam     |
| WBGene00044318 | <i>tag-267</i>    | CBG15252 | 3 | Inf | 96.23044892 | Unambiguous reciprocal BLAST | Supported by synteny     | Not confirmed by Treefam |
| WBGene00004491 | <i>rps-22</i>     | CBG11742 | 3 | Inf | 23.39794001 | Unambiguous reciprocal BLAST | Supported by synteny     | Confirmed by Treefam     |
| WBGene00003917 | <i>par-2</i>      | CBG15155 | 3 | Inf |             | Unambiguous reciprocal BLAST | Supported by synteny     | Not confirmed by Treefam |
| WBGene00004498 | <i>rps-29</i>     | CBG15290 | 3 | Inf | 32.69019608 | Unambiguous reciprocal BLAST | Supported by synteny     | Confirmed by Treefam     |
| WBGene00000263 | <i>F23H11.5</i>   | CBG15171 | 3 | Inf | 58.49136169 | Unambiguous reciprocal BLAST | Supported by synteny     | Confirmed by Treefam     |
| WBGene00022106 | <i>lgc-46</i>     | CBG11729 | 3 | Inf |             | Unambiguous reciprocal BLAST | Supported by synteny     | Confirmed by Treefam     |
| WBGene00021021 | <i>W04B5.4</i>    | CBG15659 | 3 | Inf | 130.5228787 | Unambiguous reciprocal BLAST | Supported by synteny     | Confirmed by Treefam     |
| WBGene00020105 | <i>R148.7</i>     | CBG20303 | 3 | Inf | 20.65321251 | Unambiguous reciprocal BLAST | Supported by synteny     | Not confirmed by Treefam |
| WBGene00006725 | <i>ubl-1</i>      | CBG22466 | 3 | Inf | 73.77815125 | Unambiguous reciprocal BLAST | Supported by synteny     | Confirmed by Treefam     |
| WBGene00007927 | <i>C34C12.8</i>   | CBG09795 | 3 | Inf | 156.7781513 | Unambiguous reciprocal BLAST | Not supported by synteny | Confirmed by Treefam     |
| WBGene00003930 | <i>pat-3</i>      | CBG03601 | 3 | Inf |             | Unambiguous reciprocal BLAST | Supported by synteny     | Confirmed by Treefam     |
| WBGene00011367 | <i>T02C12.2</i>   | CBG20195 | 3 | Inf |             | Unambiguous reciprocal BLAST | Supported by synteny     | Confirmed by Treefam     |
| WBGene00011111 | <i>snfc-5</i>     | CBG18075 | 3 | Inf |             | Unambiguous reciprocal BLAST | Supported by synteny     | Confirmed by Treefam     |
| WBGene00012858 | <i>Y44F5A.1</i>   | CBG24890 | 3 | Inf |             | Unambiguous reciprocal BLAST | Not supported by synteny | Confirmed by Treefam     |
| WBGene00011605 | <i>T08A11.2</i>   | CBG21228 | 3 | Inf |             | Unambiguous reciprocal BLAST | Supported by synteny     | Confirmed by Treefam     |
| WBGene00011109 | <i>R07E5.1</i>    | CBG18072 | 3 | Inf |             | Unambiguous reciprocal BLAST | Supported by synteny     | Confirmed by Treefam     |
| WBGene00004392 | <i>rnr-2</i>      | CBG20205 | 3 | Inf |             | Unambiguous reciprocal BLAST | Not supported by synteny | Confirmed by Treefam     |
| WBGene00003157 | <i>mcm-5</i>      | CBG12303 | 3 | Inf |             | Unambiguous reciprocal BLAST | Supported by synteny     | Confirmed by Treefam     |
| WBGene00009649 | <i>F43C1.5</i>    | CBG21243 | 3 | Inf | 53.75966784 | Unambiguous reciprocal BLAST | Supported by synteny     | Not confirmed by Treefam |
| WBGene00011115 | <i>R07E5.7</i>    | CBG18066 | 3 | Inf | 99.26324143 | Unambiguous reciprocal BLAST | Not supported by synteny | Confirmed by Treefam     |
| WBGene00010428 | <i>dcn-1</i>      | CBG18096 | 3 | Inf | 136.3521825 | Unambiguous reciprocal BLAST | Supported by synteny     | Confirmed by Treefam     |



|                |                  |          |  |   |     |             |                              |                          |                          |
|----------------|------------------|----------|--|---|-----|-------------|------------------------------|--------------------------|--------------------------|
| WBGene00003073 | <i>lars-1</i>    | CBG20159 |  | 3 | Inf |             | Unambiguous reciprocal BLAST | Supported by synteny     | Confirmed by Treefam     |
| WBGene00007627 | <i>ccdc-55</i>   | CBG20153 |  | 3 | Inf |             | Unambiguous reciprocal BLAST | Supported by synteny     | Confirmed by Treefam     |
| WBGene00001259 | <i>emb-5</i>     | CBG18001 |  | 3 | Inf |             | Unambiguous reciprocal BLAST | Supported by synteny     | Confirmed by Treefam     |
| WBGene00004387 | <i>rnp-4</i>     | CBG18074 |  | 3 |     | 80.14612804 | Unambiguous reciprocal BLAST | Supported by synteny     | Confirmed by Treefam     |
| WBGene00010905 | <i>M88.2</i>     | CBG18046 |  | 3 |     | 156.60206   | Unambiguous reciprocal BLAST | Supported by synteny     | Confirmed by Treefam     |
| WBGene00004874 | <i>smc-4</i>     | CBG18034 |  | 3 | Inf |             | Unambiguous reciprocal BLAST | Supported by synteny     | Confirmed by Treefam     |
| WBGene00011412 | <i>T04A8.11</i>  | CBG18006 |  | 3 |     | 150.4771213 | Unambiguous reciprocal BLAST | Supported by synteny     | Confirmed by Treefam     |
| WBGene00000206 | <i>asb-1</i>     | CBG18031 |  | 3 | Inf |             | Unambiguous reciprocal BLAST | Supported by synteny     | Confirmed by Treefam     |
| WBGene00004469 | <i>rps-0</i>     | CBG17994 |  | 3 | Inf |             | Unambiguous reciprocal BLAST | Not supported by synteny | Confirmed by Treefam     |
| WBGene00007171 | <i>B0393.6</i>   | CBG17986 |  | 3 |     | 166.8239087 | Unambiguous reciprocal BLAST | Supported by synteny     | Confirmed by Treefam     |
| WBGene00011408 | <i>T04A8.6</i>   | CBG18012 |  | 3 |     | 116.5228787 | Unambiguous reciprocal BLAST | Supported by synteny     | Confirmed by Treefam     |
| WBGene00016439 | <i>C35D10.1</i>  | CBG17947 |  | 3 |     | 135.3117539 | Unambiguous reciprocal BLAST | Supported by synteny     | Confirmed by Treefam     |
| WBGene00006735 | <i>ula-1</i>     | CBG18190 |  | 3 | Inf |             | Unambiguous reciprocal BLAST | Supported by synteny     | Confirmed by Treefam     |
| WBGene00016676 | <i>C45G9.5</i>   | CBG23022 |  | 3 |     | 179.0280287 | Unambiguous reciprocal BLAST | Supported by synteny     | Not confirmed by Treefam |
| WBGene00019628 | <i>pup-2</i>     | CBG03540 |  | 3 | Inf |             | Unambiguous reciprocal BLAST | Supported by synteny     | Confirmed by Treefam     |
| WBGene00001262 | <i>emb-8</i>     | CBG03543 |  | 3 | Inf |             | Unambiguous reciprocal BLAST | Supported by synteny     | Confirmed by Treefam     |
| WBGene00020092 | <i>pcf-11</i>    | CBG16521 |  | 3 | Inf |             | Unambiguous reciprocal BLAST | Supported by synteny     | Confirmed by Treefam     |
| WBGene00016443 | <i>C35D10.6</i>  | CBG17960 |  | 3 |     | 105.69897   | Unambiguous reciprocal BLAST | Supported by synteny     | Confirmed by Treefam     |
| WBGene00020423 | <i>T10F2.4</i>   | CBG21324 |  | 3 | Inf |             | Unambiguous reciprocal BLAST | Supported by synteny     | Confirmed by Treefam     |
| WBGene00021900 | <i>Y54H5A.2</i>  | CBG21314 |  | 3 |     | 57.82390874 | Unambiguous reciprocal BLAST | Supported by synteny     | Confirmed by Treefam     |
| WBGene00006736 | <i>ulp-1</i>     | CBG21323 |  | 3 | Inf |             | Unambiguous reciprocal BLAST | Supported by synteny     | Confirmed by Treefam     |
| WBGene00016170 | <i>C27F2.8</i>   | CBG16531 |  | 3 | Inf |             | Unambiguous reciprocal BLAST | Supported by synteny     | Confirmed by Treefam     |
| WBGene00018963 | <i>ucr-1</i>     | CBG08976 |  | 3 | Inf |             | Unambiguous reciprocal BLAST | Supported by synteny     | Confirmed by Treefam     |
| WBGene00001661 | <i>gop-2</i>     | CBG21182 |  | 3 | Inf |             | Unambiguous reciprocal BLAST | Supported by synteny     | Confirmed by Treefam     |
| WBGene00019836 | <i>R02F2.7</i>   | CBG05202 |  | 3 | Inf |             | Unambiguous reciprocal BLAST | Not supported by synteny | Confirmed by Treefam     |
| WBGene00022598 | <i>ztf-8</i>     | CBG21193 |  | 3 | Inf |             | Unambiguous reciprocal BLAST | Supported by synteny     | Not confirmed by Treefam |
| WBGene00003371 | <i>mhc-3</i>     | CBG24046 |  | 3 |     | 55.82390874 | Unambiguous reciprocal BLAST | Supported by synteny     | Confirmed by Treefam     |
| WBGene00003901 | <i>paa-1</i>     | CBG05190 |  | 3 | Inf |             | Unambiguous reciprocal BLAST | Supported by synteny     | Confirmed by Treefam     |
| WBGene00018609 | <i>F48E8.2</i>   | CBG05193 |  | 3 | Inf |             | Unambiguous reciprocal BLAST | Supported by synteny     | Confirmed by Treefam     |
| WBGene00004481 | <i>rps-12</i>    | CBG08991 |  | 3 |     | 89.39794011 | Unambiguous reciprocal BLAST | Supported by synteny     | Confirmed by Treefam     |
| WBGene00006943 | <i>wrm-1</i>     | CBG09006 |  | 3 | Inf |             | Unambiguous reciprocal BLAST | Supported by synteny     | Confirmed by Treefam     |
| WBGene00001869 | <i>him-10</i>    | CBG09087 |  | 3 |     | 170.0413927 | Unambiguous reciprocal BLAST | Supported by synteny     | Confirmed by Treefam     |
| WBGene00000182 | <i>arf-1.2</i>   | CBG09004 |  | 3 |     | 20.95424251 | Unambiguous reciprocal BLAST | Supported by synteny     | Confirmed by Treefam     |
| WBGene00015143 | <i>B0336.3</i>   | CBG09003 |  | 3 | Inf |             | Unambiguous reciprocal BLAST | Supported by synteny     | Confirmed by Treefam     |
| WBGene00004858 | <i>sma-4</i>     | CBG09090 |  | 3 | Inf |             | Unambiguous reciprocal BLAST | Not supported by synteny | Confirmed by Treefam     |
| WBGene00004435 | <i>rpl-23</i>    | CBG09001 |  | 3 |     | 97.61978876 | Unambiguous reciprocal BLAST | Supported by synteny     | Confirmed by Treefam     |
| WBGene00017162 | <i>ddx-23</i>    | CBG09074 |  | 3 | Inf |             | Unambiguous reciprocal BLAST | Supported by synteny     | Confirmed by Treefam     |
| WBGene00015487 | <i>C05D11.10</i> | CBG19669 |  | 3 |     | 111.3117539 | Unambiguous reciprocal BLAST | Supported by synteny     | Confirmed by Treefam     |
| WBGene00002855 | <i>let-721</i>   | CBG19676 |  | 3 | Inf |             | Unambiguous reciprocal BLAST | Supported by synteny     | Confirmed by Treefam     |
| WBGene00006516 | <i>vps-16</i>    | CBG19671 |  | 3 | Inf |             | Unambiguous reciprocal BLAST | Supported by synteny     | Confirmed by Treefam     |
| WBGene00001972 | <i>hmg-1.2</i>   | CBG17468 |  | 3 |     | 144         | Unambiguous reciprocal BLAST | Supported by synteny     | Confirmed by Treefam     |
| WBGene00015809 | <i>C16A3.4</i>   | CBG19691 |  | 3 | Inf |             | Unambiguous reciprocal BLAST | Supported by synteny     | Confirmed by Treefam     |
| WBGene00006515 | <i>tag-170</i>   | CBG19670 |  | 3 |     | 137.60206   | Unambiguous reciprocal BLAST | Supported by synteny     | Confirmed by Treefam     |
| WBGene00016015 | <i>C23G10.8</i>  | CBG24263 |  | 3 | Inf |             | Unambiguous reciprocal BLAST | Supported by synteny     | Confirmed by Treefam     |
| WBGene00001005 | <i>dlc-1</i>     | CBG19682 |  | 3 |     | 39.64781748 | Unambiguous reciprocal BLAST | Supported by synteny     | Confirmed by Treefam     |
| WBGene00015486 | <i>C05D11.9</i>  | CBG19668 |  | 3 | Inf |             | Unambiguous reciprocal BLAST | Supported by synteny     | Confirmed by Treefam     |
| WBGene00004472 | <i>rps-3</i>     | CBG24262 |  | 3 |     | 179.0413927 | Unambiguous reciprocal BLAST | Supported by synteny     | Confirmed by Treefam     |
| WBGene00020437 | <i>T12A2.2</i>   | CBG17485 |  | 3 | Inf |             | Unambiguous reciprocal BLAST | Supported by synteny     | Confirmed by Treefam     |
| WBGene00015811 | <i>C16A3.6</i>   | CBG19689 |  | 3 |     | 162.90309   | Unambiguous reciprocal BLAST | Supported by synteny     | Confirmed by Treefam     |
| WBGene00015810 | <i>C16A3.5</i>   | CBG19690 |  | 3 |     | 117.462398  | Unambiguous reciprocal BLAST | Supported by synteny     | Confirmed by Treefam     |
| WBGene00004781 | <i>set-1</i>     | CBG19678 |  | 3 |     | 23.17609126 | Unambiguous reciprocal BLAST | Supported by synteny     | Confirmed by Treefam     |
| WBGene00019380 | <i>K04C2.2</i>   | CBG18218 |  | 3 | Inf |             | Unambiguous reciprocal BLAST | Supported by synteny     | Confirmed by Treefam     |
| WBGene00015734 | <i>C13B9.3</i>   | CBG15197 |  | 3 | Inf |             | Unambiguous reciprocal BLAST | Supported by synteny     | Confirmed by Treefam     |
| WBGene00002169 | <i>isw-1</i>     | CBG16574 |  | 3 | Inf |             | Unambiguous reciprocal BLAST | Supported by synteny     | Confirmed by Treefam     |
| WBGene00020068 | <i>cra-1</i>     | CBG16540 |  | 3 | Inf |             | Unambiguous reciprocal BLAST | Supported by synteny     | Confirmed by Treefam     |
| WBGene00000276 | <i>byn-1</i>     | CBG16479 |  | 3 | Inf |             | Unambiguous reciprocal BLAST | Supported by synteny     | Confirmed by Treefam     |
| WBGene00000443 | <i>ceh-20</i>    | CBG16494 |  | 3 | Inf |             | Unambiguous reciprocal BLAST | Supported by synteny     | Confirmed by Treefam     |
| WBGene00020601 | <i>T20B12.3</i>  | CBG09137 |  | 3 | Inf |             | Unambiguous reciprocal BLAST | Supported by synteny     | Confirmed by Treefam     |
| WBGene00018151 | <i>F37C12.3</i>  | CBG08349 |  | 3 |     | 50.69897    | Unambiguous reciprocal BLAST | Supported by synteny     | Confirmed by Treefam     |
| WBGene00020636 | <i>T20H4.5</i>   | CBG24154 |  | 3 |     | 154.2340832 | Unambiguous reciprocal BLAST | Supported by synteny     | Confirmed by Treefam     |

|                |                 |          |   |     |             |                              |                          |                          |  |
|----------------|-----------------|----------|---|-----|-------------|------------------------------|--------------------------|--------------------------|--|
| WBGene00015162 | <i>B0361.8</i>  | CBG15348 | 3 | Inf |             | Unambiguous reciprocal BLAST | Supported by synteny     | Confirmed by Treefam     |  |
| WBGene00019401 | <i>nuo-4</i>    | CBG16606 | 3 | Inf |             | Unambiguous reciprocal BLAST | Supported by synteny     | Confirmed by Treefam     |  |
| WBGene00018154 | <i>exos-9</i>   | CBG16619 | 3 | Inf |             | Unambiguous reciprocal BLAST | Supported by synteny     | Confirmed by Treefam     |  |
| WBGene00004483 | <i>rps-14</i>   | CBG08351 | 3 |     | 105.4149733 | Unambiguous reciprocal BLAST | Not supported by synteny | Confirmed by Treefam     |  |
| WBGene00006542 | <i>tbp-1</i>    | CBG09138 | 3 | Inf |             | Unambiguous reciprocal BLAST | Supported by synteny     | Confirmed by Treefam     |  |
| WBGene00017268 | <i>F08F8.2</i>  | CBG15296 | 3 | Inf |             | Unambiguous reciprocal BLAST | Supported by synteny     | Confirmed by Treefam     |  |
| WBGene00015164 | <i>ykt-6</i>    | CBG15347 | 3 |     | 124.09691   | Unambiguous reciprocal BLAST | Supported by synteny     | Confirmed by Treefam     |  |
| WBGene00004417 | <i>rpl-6</i>    | CBG16622 | 3 |     | 144.8260748 | Unambiguous reciprocal BLAST | Supported by synteny     | Confirmed by Treefam     |  |
| WBGene00020604 | <i>T20B12.7</i> | CBG09135 | 3 |     | 130.7403627 | Unambiguous reciprocal BLAST | Supported by synteny     | Confirmed by Treefam     |  |
| WBGene00020600 | <i>T20B12.1</i> | CBG09139 | 3 | Inf |             | Unambiguous reciprocal BLAST | Supported by synteny     | Confirmed by Treefam     |  |
| WBGene00004490 | <i>rps-21</i>   | CBG16614 | 3 |     | 58.36797679 | Unambiguous reciprocal BLAST | Supported by synteny     | Confirmed by Treefam     |  |
| WBGene00018149 | <i>F37C12.1</i> | CBG16611 | 3 | Inf |             | Unambiguous reciprocal BLAST | Supported by synteny     | Confirmed by Treefam     |  |
| WBGene00000479 | <i>cgh-1</i>    | CBG09177 | 3 | Inf |             | Unambiguous reciprocal BLAST | Supported by synteny     | Confirmed by Treefam     |  |
| WBGene00001209 | <i>egl-45</i>   | CBG00021 | 3 | Inf |             | Unambiguous reciprocal BLAST | Supported by synteny     | Confirmed by Treefam     |  |
| WBGene00022793 | <i>ZK686.3</i>  | CBG00031 | 3 | Inf |             | Unambiguous reciprocal BLAST | Supported by synteny     | Confirmed by Treefam     |  |
| WBGene00015591 | <i>C08C3.4</i>  | CBG00026 | 3 |     | 149.69897   | Unambiguous reciprocal BLAST | Supported by synteny     | Confirmed by Treefam     |  |
| WBGene00022803 | <i>ZK688.9</i>  | CBG12266 | 3 |     | 24.12493874 | Unambiguous reciprocal BLAST | Not supported by synteny | Confirmed by Treefam     |  |
| WBGene00022792 | <i>ZK686.2</i>  | CBG00032 | 3 | Inf |             | Unambiguous reciprocal BLAST | Supported by synteny     | Confirmed by Treefam     |  |
| WBGene00016202 | <i>kle-2</i>    | CBG12291 | 3 | Inf |             | Unambiguous reciprocal BLAST | Not supported by synteny | Confirmed by Treefam     |  |
| WBGene00003063 | <i>lpd-7</i>    | CBG09152 | 3 | Inf |             | Unambiguous reciprocal BLAST | Supported by synteny     | Confirmed by Treefam     |  |
| WBGene00018846 | <i>eef-1B.1</i> | CBG22942 | 3 |     | 53          | Unambiguous reciprocal BLAST | Supported by synteny     | Confirmed by Treefam     |  |
| WBGene00004420 | <i>rpl-9</i>    | CBG09153 | 3 |     | 133.5563025 | Unambiguous reciprocal BLAST | Supported by synteny     | Confirmed by Treefam     |  |
| WBGene00003024 | <i>lin-39</i>   | CBG09167 | 3 |     | 97.69897    | Unambiguous reciprocal BLAST | Supported by synteny     | Confirmed by Treefam     |  |
| WBGene00022816 | <i>fnr-1</i>    | CBG00005 | 3 | Inf |             | Unambiguous reciprocal BLAST | Supported by synteny     | Confirmed by Treefam     |  |
| WBGene00004918 | <i>snr-5</i>    | CBG12250 | 3 |     | 34          | Unambiguous reciprocal BLAST | Supported by synteny     | Confirmed by Treefam     |  |
| WBGene00004449 | <i>rpl-35</i>   | CBG12256 | 3 |     | 68.67209786 | Unambiguous reciprocal BLAST | Supported by synteny     | Confirmed by Treefam     |  |
| WBGene00017319 | <i>F09G8.3</i>  | CBG16652 | 3 | Inf |             | Unambiguous reciprocal BLAST | Supported by synteny     | Confirmed by Treefam     |  |
| WBGene00002231 | <i>knl-1</i>    | CBG24615 | 3 |     | 32.57403127 | Unambiguous reciprocal BLAST | Not supported by synteny | Not confirmed by Treefam |  |
| WBGene00019678 | <i>K12H4.3</i>  | CBG22980 | 3 | Inf |             | Unambiguous reciprocal BLAST | Supported by synteny     | Confirmed by Treefam     |  |
| WBGene00000448 | <i>ceh-26</i>   | CBG22984 | 3 | Inf |             | Unambiguous reciprocal BLAST | Supported by synteny     | Confirmed by Treefam     |  |
| WBGene00003952 | <i>pbs-6</i>    | CBG24778 | 3 | Inf |             | Unambiguous reciprocal BLAST | Not supported by synteny | Confirmed by Treefam     |  |
| WBGene00019680 | <i>K12H4.5</i>  | CBG22978 | 3 |     | 62.74036269 | Unambiguous reciprocal BLAST | Not supported by synteny | Confirmed by Treefam     |  |
| WBGene00006840 | <i>unc-116</i>  | CBG18164 | 3 | Inf |             | Unambiguous reciprocal BLAST | Not supported by synteny | Confirmed by Treefam     |  |
| WBGene00004726 | <i>sas-4</i>    | CBG24501 | 3 | Inf |             | Unambiguous reciprocal BLAST | Not supported by synteny | Not confirmed by Treefam |  |
| WBGene00019679 | <i>K12H4.4</i>  | CBG22979 | 3 |     | 110.2671717 | Unambiguous reciprocal BLAST | Supported by synteny     | Confirmed by Treefam     |  |
| WBGene00017356 | <i>F10E9.4</i>  | CBG16639 | 3 |     | 122.7231037 | Unambiguous reciprocal BLAST | Supported by synteny     | Not confirmed by Treefam |  |
| WBGene00000143 | <i>apc-2</i>    | CBG22973 | 3 | Inf |             | Unambiguous reciprocal BLAST | Supported by synteny     | Confirmed by Treefam     |  |
| WBGene00004125 | <i>mdt-30</i>   | CBG22958 | 3 |     | 98.26717173 | Unambiguous reciprocal BLAST | Supported by synteny     | Not confirmed by Treefam |  |
| WBGene00017044 | <i>D2007.4</i>  | CBG16676 | 3 |     | 115.447158  | Unambiguous reciprocal BLAST | Supported by synteny     | Confirmed by Treefam     |  |
| WBGene00004187 | <i>prp-8</i>    | CBG16670 | 3 | Inf |             | Unambiguous reciprocal BLAST | Supported by synteny     | Confirmed by Treefam     |  |
| WBGene00004433 | <i>rpl-21</i>   | CBG16683 | 3 |     | 114.0413927 | Unambiguous reciprocal BLAST | Supported by synteny     | Confirmed by Treefam     |  |
| WBGene00004460 | <i>rpn-3</i>    | CBG18132 | 3 | Inf |             | Unambiguous reciprocal BLAST | Supported by synteny     | Confirmed by Treefam     |  |
| WBGene00022864 | <i>ZK1236.5</i> | CBG18136 | 3 |     | 70.22184875 | Unambiguous reciprocal BLAST | Supported by synteny     | Not confirmed by Treefam |  |
| WBGene00016250 | <i>C30C11.4</i> | CBG18133 | 3 | Inf |             | Unambiguous reciprocal BLAST | Supported by synteny     | Confirmed by Treefam     |  |
| WBGene00016249 | <i>C30C11.1</i> | CBG18131 | 3 |     | 82.97312785 | Unambiguous reciprocal BLAST | Supported by synteny     | Confirmed by Treefam     |  |
| WBGene00015133 | <i>B0303.15</i> | CBG15344 | 3 |     | 135.5228787 | Unambiguous reciprocal BLAST | Supported by synteny     | Confirmed by Treefam     |  |
| WBGene00015525 | <i>rha-2</i>    | CBG15333 | 3 | Inf |             | Unambiguous reciprocal BLAST | Supported by synteny     | Confirmed by Treefam     |  |
| WBGene00019305 | <i>snap-29</i>  | CBG06912 | 3 | Inf |             | Unambiguous reciprocal BLAST | Supported by synteny     | Confirmed by Treefam     |  |
| WBGene00004391 | <i>rnr-1</i>    | CBG10154 | 3 | Inf |             | Unambiguous reciprocal BLAST | Not supported by synteny | Confirmed by Treefam     |  |
| WBGene00011143 | <i>R08D7.2</i>  | CBG06841 | 3 | Inf |             | Unambiguous reciprocal BLAST | Supported by synteny     | Confirmed by Treefam     |  |
| WBGene00001227 | <i>eif-3.D</i>  | CBG06842 | 3 | Inf |             | Unambiguous reciprocal BLAST | Supported by synteny     | Confirmed by Treefam     |  |
| WBGene00002081 | <i>ina-1</i>    | CBG06805 | 3 | Inf |             | Unambiguous reciprocal BLAST | Supported by synteny     | Confirmed by Treefam     |  |
| WBGene00011142 | <i>R08D7.1</i>  | CBG06840 | 3 | Inf |             | Unambiguous reciprocal BLAST | Supported by synteny     | Confirmed by Treefam     |  |
| WBGene00008514 | <i>F02A9.4</i>  | CBG06810 | 3 | Inf |             | Unambiguous reciprocal BLAST | Supported by synteny     | Confirmed by Treefam     |  |
| WBGene00001385 | <i>far-1</i>    | CBG06812 | 3 |     | 37.60205999 | Unambiguous reciprocal BLAST | Supported by synteny     | Confirmed by Treefam     |  |
| WBGene00001570 | <i>gel-13</i>   | CBG10038 | 3 | Inf |             | Unambiguous reciprocal BLAST | Supported by synteny     | Confirmed by Treefam     |  |
| WBGene00010038 | <i>rheb-1</i>   | CBG10088 | 3 |     | 72.77815125 | Unambiguous reciprocal BLAST | Supported by synteny     | Confirmed by Treefam     |  |
| WBGene00000235 | <i>baf-1</i>    | CBG10084 | 3 |     | 59.45863785 | Unambiguous reciprocal BLAST | Supported by synteny     | Confirmed by Treefam     |  |
| WBGene00007400 | <i>C07A9.2</i>  | CBG10019 | 3 |     | 105.5910646 | Unambiguous reciprocal BLAST | Supported by synteny     | Confirmed by Treefam     |  |
| WBGene00001094 | <i>dars-1</i>   | CBG10076 | 3 | Inf |             | Unambiguous reciprocal BLAST | Supported by synteny     | Confirmed by Treefam     |  |

|                |            |          |  |   |     |             |                              |                          |                          |
|----------------|------------|----------|--|---|-----|-------------|------------------------------|--------------------------|--------------------------|
| WBGene00012059 | T26G10.1   | CBG10097 |  | 3 | Inf |             | Unambiguous reciprocal BLAST | Supported by synteny     | Confirmed by Treefam     |
| WBGene00001284 | emb-30     | CBG10093 |  | 3 | Inf |             | Unambiguous reciprocal BLAST | Supported by synteny     | Confirmed by Treefam     |
| WBGene00014224 | ZK1098.7   | CBG10064 |  | 3 |     | 84.92081875 | Unambiguous reciprocal BLAST | Supported by synteny     | Confirmed by Treefam     |
| WBGene00000405 | cdk-1      | CBG10007 |  | 3 | Inf |             | Unambiguous reciprocal BLAST | Supported by synteny     | Confirmed by Treefam     |
| WBGene00004180 | pri-1      | CBG10030 |  | 3 | Inf |             | Unambiguous reciprocal BLAST | Supported by synteny     | Not confirmed by Treefam |
| WBGene00006910 | vha-1      | CBG10001 |  | 3 |     | 23.34678749 | Unambiguous reciprocal BLAST | Not supported by synteny | Confirmed by Treefam     |
| WBGene00000833 | cts-1      | CBG09810 |  | 3 | Inf |             | Unambiguous reciprocal BLAST | Supported by synteny     | Confirmed by Treefam     |
| WBGene00011867 | chc-1      | CBG09806 |  | 3 | Inf |             | Unambiguous reciprocal BLAST | Supported by synteny     | Confirmed by Treefam     |
| WBGene00014011 | ZK632.2    | CBG09993 |  | 3 | Inf |             | Unambiguous reciprocal BLAST | Supported by synteny     | Confirmed by Treefam     |
| WBGene00011806 | ekl-6      | CBG09896 |  | 3 | Inf |             | Unambiguous reciprocal BLAST | Supported by synteny     | Confirmed by Treefam     |
| WBGene00011814 | T16H12.4   | CBG09887 |  | 3 | Inf |             | Unambiguous reciprocal BLAST | Supported by synteny     | Confirmed by Treefam     |
| WBGene00006783 | unc-47     | CBG09800 |  | 3 | Inf |             | Unambiguous reciprocal BLAST | Supported by synteny     | Confirmed by Treefam     |
| WBGene00012359 | W09D10.1   | CBG18321 |  | 3 | Inf |             | Unambiguous reciprocal BLAST | Supported by synteny     | Confirmed by Treefam     |
| WBGene00003225 | mev-1      | CBG24607 |  | 3 |     | 116.9472936 | Unambiguous reciprocal BLAST | Supported by synteny     | Confirmed by Treefam     |
| WBGene00001002 | div-1      | CBG23795 |  | 3 | Inf |             | Unambiguous reciprocal BLAST | Supported by synteny     | Confirmed by Treefam     |
| WBGene00011559 | umps-1     | CBG24564 |  | 3 | Inf |             | Unambiguous reciprocal BLAST | Supported by synteny     | Confirmed by Treefam     |
| WBGene00010844 | M03C11.7   | CBG18389 |  | 3 | Inf |             | Unambiguous reciprocal BLAST | Supported by synteny     | Confirmed by Treefam     |
| WBGene00010476 | rnf-113    | CBG18314 |  | 3 |     | 171.7781513 | Unambiguous reciprocal BLAST | Supported by synteny     | Confirmed by Treefam     |
| WBGene00012977 | Y48A6C.4   | CBG13183 |  | 3 | Inf |             | Unambiguous reciprocal BLAST | Not supported by synteny | Not confirmed by Treefam |
| WBGene00004302 | ran-1      | CBG18317 |  | 3 |     | 132.60206   | Unambiguous reciprocal BLAST | Supported by synteny     | Confirmed by Treefam     |
| WBGene00012966 | exos-1     | CBG18230 |  | 3 |     | 139.0669468 | Unambiguous reciprocal BLAST | Supported by synteny     | Confirmed by Treefam     |
| WBGene00012964 | Y48A6B.3   | CBG18231 |  | 3 |     | 92.69897    | Unambiguous reciprocal BLAST | Not supported by synteny | Confirmed by Treefam     |
| WBGene00013237 | Y56A3A.19  | CBG13312 |  | 3 |     | 56.90308999 | Unambiguous reciprocal BLAST | Supported by synteny     | Confirmed by Treefam     |
| WBGene00007703 | gbf-1      | CBG13224 |  | 3 | Inf |             | Unambiguous reciprocal BLAST | Supported by synteny     | Confirmed by Treefam     |
| WBGene00013544 | Y75B8A.7   | CBG23016 |  | 3 | Inf |             | Unambiguous reciprocal BLAST | Supported by synteny     | Confirmed by Treefam     |
| WBGene00001235 | elb-1      | CBG13236 |  | 3 |     | 59.49485002 | Unambiguous reciprocal BLAST | Supported by synteny     | Confirmed by Treefam     |
| WBGene00012756 | Y41C4A.9   | CBG13237 |  | 3 | Inf |             | Unambiguous reciprocal BLAST | Supported by synteny     | Confirmed by Treefam     |
| WBGene00006937 | wah-1      | CBG13330 |  | 3 | Inf |             | Unambiguous reciprocal BLAST | Supported by synteny     | Confirmed by Treefam     |
| WBGene00012554 | Y37D8A.16  | CBG15761 |  | 3 |     | 78.39794001 | Unambiguous reciprocal BLAST | Not supported by synteny | Not confirmed by Treefam |
| WBGene00013558 | Y75B8A.25  | CBG22564 |  | 3 |     | 65.47712125 | Unambiguous reciprocal BLAST | Not supported by synteny | Not confirmed by Treefam |
| WBGene00012550 | Y37D8A.10  | CBG15767 |  | 3 |     | 118.1356626 | Unambiguous reciprocal BLAST | Supported by synteny     | Confirmed by Treefam     |
| WBGene00012556 | Y37D8A.18  | CBG15759 |  | 3 |     | 100.0413927 | Unambiguous reciprocal BLAST | Supported by synteny     | Confirmed by Treefam     |
| WBGene00013029 | glrx-5     | CBG11774 |  | 3 |     | 55          | Unambiguous reciprocal BLAST | Not supported by synteny | Confirmed by Treefam     |
| WBGene00013737 | tpst-1     | CBG03560 |  | 3 | Inf |             | Unambiguous reciprocal BLAST | Supported by synteny     | Confirmed by Treefam     |
| WBGene00013038 | ani-1      | CBG11691 |  | 3 | Inf |             | Unambiguous reciprocal BLAST | Not supported by synteny | Confirmed by Treefam     |
| WBGene00012553 | cco-2      | CBG15765 |  | 3 |     | 119.69897   | Unambiguous reciprocal BLAST | Supported by synteny     | Confirmed by Treefam     |
| WBGene00013040 | Y49E10.21  | CBG11693 |  | 3 |     | 107.6720979 | Unambiguous reciprocal BLAST | Supported by synteny     | Not confirmed by Treefam |
| WBGene00012714 | abce-1     | CBG22999 |  | 3 | Inf |             | Unambiguous reciprocal BLAST | Supported by synteny     | Confirmed by Treefam     |
| WBGene00002229 | klp-19     | CBG01568 |  | 3 | Inf |             | Unambiguous reciprocal BLAST | Not supported by synteny | Confirmed by Treefam     |
| WBGene00000774 | cpf-2      | CBG03568 |  | 3 |     | 126.8908555 | Unambiguous reciprocal BLAST | Supported by synteny     | Confirmed by Treefam     |
| WBGene00003047 | lis-1      | CBG21225 |  | 3 | Inf |             | Unambiguous reciprocal BLAST | Supported by synteny     | Confirmed by Treefam     |
| WBGene00014177 | frg-1      | CBG15774 |  | 3 |     | 164.6892102 | Unambiguous reciprocal BLAST | Supported by synteny     | Confirmed by Treefam     |
| WBGene00003829 | nud-1      | CBG24281 |  | 3 | Inf |             | Unambiguous reciprocal BLAST | Not supported by synteny | Confirmed by Treefam     |
| WBGene00006391 | taf-9      | CBG18251 |  | 3 |     | 106.3467875 | Unambiguous reciprocal BLAST | Supported by synteny     | Confirmed by Treefam     |
| WBGene00011734 | T12D8.6    | CBG18252 |  | 3 |     | 50.57403127 | Unambiguous reciprocal BLAST | Supported by synteny     | Confirmed by Treefam     |
| WBGene00001236 | elc-1      | CBG11707 |  | 3 |     | 44          | Unambiguous reciprocal BLAST | Supported by synteny     | Confirmed by Treefam     |
| WBGene00011729 | set-16     | CBG18244 |  | 3 | Inf |             | Unambiguous reciprocal BLAST | Supported by synteny     | Confirmed by Treefam     |
| WBGene00000875 | cyk-4      | CBG18263 |  | 3 | Inf |             | Unambiguous reciprocal BLAST | Supported by synteny     | Confirmed by Treefam     |
| WBGene00004075 | pod-1      | CBG15309 |  | 3 | Inf |             | Unambiguous reciprocal BLAST | Supported by synteny     | Confirmed by Treefam     |
| WBGene00022348 | Y82E9BR.16 | CBG11705 |  | 3 | Inf |             | Unambiguous reciprocal BLAST | Supported by synteny     | Confirmed by Treefam     |
| WBGene00021800 | Y53G8AL.2  | CBG20301 |  | 3 | Inf |             | Unambiguous reciprocal BLAST | Supported by synteny     | Confirmed by Treefam     |
| WBGene00022185 | Y71H2AM.20 | CBG09818 |  | 3 | Inf |             | Unambiguous reciprocal BLAST | Supported by synteny     | Confirmed by Treefam     |
| WBGene00022169 | Y71H2AM.4  | CBG09820 |  | 3 |     | 80.42324587 | Unambiguous reciprocal BLAST | Supported by synteny     | Confirmed by Treefam     |
| WBGene00022182 | Y71H2AM.17 | CBG09815 |  | 3 |     | 158.39794   | Unambiguous reciprocal BLAST | Supported by synteny     | Confirmed by Treefam     |
| WBGene00019298 | K02D7.1    | CBG13501 |  | 3 | Inf |             | Unambiguous reciprocal BLAST | Supported by synteny     | Confirmed by Treefam     |
| WBGene00003932 | pat-6      | CBG22549 |  | 3 | Inf |             | Unambiguous reciprocal BLAST | Supported by synteny     | Confirmed by Treefam     |
| WBGene00022045 | tag-313    | CBG13496 |  | 3 |     | 70.10551018 | Unambiguous reciprocal BLAST | Supported by synteny     | Confirmed by Treefam     |
| WBGene00004493 | rps-24     | CBG13547 |  | 3 |     | 78.30103    | Unambiguous reciprocal BLAST | Not supported by synteny | Confirmed by Treefam     |
| WBGene00001071 | dpy-9      | CBG22547 |  | 3 |     | 109.30103   | Unambiguous reciprocal BLAST | Supported by synteny     | Not confirmed by Treefam |
| WBGene00004981 | spl-1      | CBG10544 |  | 3 | Inf |             | Unambiguous reciprocal BLAST | Supported by synteny     | Confirmed by Treefam     |

|                |                 |          |  |   |     |             |                              |                          |                          |
|----------------|-----------------|----------|--|---|-----|-------------|------------------------------|--------------------------|--------------------------|
| WBGene00019821 | <i>R02D3.3</i>  | CBG01668 |  | 3 | Inf |             | Unambiguous reciprocal BLAST | Supported by synteny     | Confirmed by Treefam     |
| WBGene00020296 | <i>T07A9.8</i>  | CBG13492 |  | 3 |     | 164.30103   | Unambiguous reciprocal BLAST | Supported by synteny     | Confirmed by Treefam     |
| WBGene00019823 | <i>fnrA-1</i>   | CBG01666 |  | 3 | Inf |             | Unambiguous reciprocal BLAST | Supported by synteny     | Confirmed by Treefam     |
| WBGene00001579 | <i>gex-2</i>    | CBG01612 |  | 3 | Inf |             | Unambiguous reciprocal BLAST | Supported by synteny     | Confirmed by Treefam     |
| WBGene00022046 | <i>Y66H1A.4</i> | CBG13541 |  | 3 |     | 50.81291336 | Unambiguous reciprocal BLAST | Supported by synteny     | Confirmed by Treefam     |
| WBGene00018932 | <i>F56B3.8</i>  | CBG23904 |  | 3 | Inf |             | Unambiguous reciprocal BLAST | Supported by synteny     | Confirmed by Treefam     |
| WBGene00018928 | <i>F56B3.2</i>  | CBG10721 |  | 3 |     | 144.30103   | Unambiguous reciprocal BLAST | Supported by synteny     | Confirmed by Treefam     |
| WBGene00016636 | <i>C44B12.1</i> | CBG13961 |  | 3 |     | 101.4866666 | Unambiguous reciprocal BLAST | Supported by synteny     | Not confirmed by Treefam |
| WBGene00009521 | <i>F38A1.8</i>  | CBG13942 |  | 3 | Inf |             | Unambiguous reciprocal BLAST | Supported by synteny     | Confirmed by Treefam     |
| WBGene00018776 | <i>F53H1.1</i>  | CBG16678 |  | 3 | Inf |             | Unambiguous reciprocal BLAST | Not supported by synteny | Not confirmed by Treefam |
| WBGene00016638 | <i>C44B12.5</i> | CBG13962 |  | 3 |     | 105.8129134 | Unambiguous reciprocal BLAST | Supported by synteny     | Not confirmed by Treefam |
| WBGene00003947 | <i>pbs-1</i>    | CBG13586 |  | 3 |     | 143.5228787 | Unambiguous reciprocal BLAST | Supported by synteny     | Confirmed by Treefam     |
| WBGene00019778 | <i>M57.2</i>    | CBG15026 |  | 3 | Inf |             | Unambiguous reciprocal BLAST | Supported by synteny     | Confirmed by Treefam     |
| WBGene00015413 | <i>C04C3.3</i>  | CBG21051 |  | 3 | Inf |             | Unambiguous reciprocal BLAST | Supported by synteny     | Confirmed by Treefam     |
| WBGene00021952 | <i>vha-19</i>   | CBG21042 |  | 3 | Inf |             | Unambiguous reciprocal BLAST | Not supported by synteny | Confirmed by Treefam     |
| WBGene00000123 | <i>ama-1</i>    | CBG05355 |  | 3 | Inf |             | Unambiguous reciprocal BLAST | Supported by synteny     | Confirmed by Treefam     |
| WBGene00004432 | <i>rpl-20</i>   | CBG01745 |  | 3 |     | 132.7533277 | Unambiguous reciprocal BLAST | Supported by synteny     | Confirmed by Treefam     |
| WBGene00017119 | <i>E04A4.5</i>  | CBG01742 |  | 3 |     | 126.3679768 | Unambiguous reciprocal BLAST | Supported by synteny     | Not confirmed by Treefam |
| WBGene00017925 | <i>F29B9.11</i> | CBG01726 |  | 3 |     | 50.50965048 | Unambiguous reciprocal BLAST | Supported by synteny     | Not confirmed by Treefam |
| WBGene00018898 | <i>F55F10.1</i> | CBG01673 |  | 3 | Inf |             | Unambiguous reciprocal BLAST | Not supported by synteny | Confirmed by Treefam     |
| WBGene00006706 | <i>ubc-9</i>    | CBG01720 |  | 3 |     | 90.69897    | Unambiguous reciprocal BLAST | Supported by synteny     | Confirmed by Treefam     |
| WBGene00017924 | <i>F29B9.10</i> | CBG01725 |  | 3 |     | 52.27300127 | Unambiguous reciprocal BLAST | Supported by synteny     | Confirmed by Treefam     |
| WBGene00015330 | <i>C02B10.5</i> | CBG19977 |  | 3 |     | 73          | Unambiguous reciprocal BLAST | Supported by synteny     | Confirmed by Treefam     |
| WBGene00002247 | <i>lam-1</i>    | CBG20003 |  | 3 | Inf |             | Unambiguous reciprocal BLAST | Not supported by synteny | Confirmed by Treefam     |
| WBGene00016955 | <i>C55C3.5</i>  | CBG19878 |  | 3 | Inf |             | Unambiguous reciprocal BLAST | Not supported by synteny | Confirmed by Treefam     |
| WBGene00001244 | <i>elo-6</i>    | CBG19953 |  | 3 | Inf |             | Unambiguous reciprocal BLAST | Not supported by synteny | Confirmed by Treefam     |
| WBGene00001411 | <i>fem-1</i>    | CBG19924 |  | 3 | Inf |             | Unambiguous reciprocal BLAST | Supported by synteny     | Confirmed by Treefam     |
| WBGene00021156 | <i>Y46B8.2</i>  | CBG19965 |  | 3 | Inf |             | Unambiguous reciprocal BLAST | Not supported by synteny | Confirmed by Treefam     |
| WBGene00004804 | <i>skn-1</i>    | CBG19887 |  | 3 |     | 174.6320232 | Unambiguous reciprocal BLAST | Supported by synteny     | Not confirmed by Treefam |
| WBGene00001243 | <i>elo-5</i>    | CBG19955 |  | 3 | Inf |             | Unambiguous reciprocal BLAST | Supported by synteny     | Confirmed by Treefam     |
| WBGene00019264 | <i>H35B03.2</i> | CBG19874 |  | 3 | Inf |             | Unambiguous reciprocal BLAST | Supported by synteny     | Confirmed by Treefam     |
| WBGene00019154 | <i>glf-1</i>    | CBG19828 |  | 3 | Inf |             | Unambiguous reciprocal BLAST | Supported by synteny     | Confirmed by Treefam     |
| WBGene00004494 | <i>rps-25</i>   | CBG09459 |  | 3 |     | 78.54406804 | Unambiguous reciprocal BLAST | Supported by synteny     | Confirmed by Treefam     |
| WBGene00020683 | <i>T22D1.4</i>  | CBG05717 |  | 3 | Inf |             | Unambiguous reciprocal BLAST | Supported by synteny     | Confirmed by Treefam     |
| WBGene00006917 | <i>vha-8</i>    | CBG05372 |  | 3 |     | 156.4960066 | Unambiguous reciprocal BLAST | Supported by synteny     | Confirmed by Treefam     |
| WBGene00020687 | <i>ruvb-2</i>   | CBG05719 |  | 3 | Inf |             | Unambiguous reciprocal BLAST | Supported by synteny     | Confirmed by Treefam     |
| WBGene00015927 | <i>dycl-1</i>   | CBG05374 |  | 3 | Inf |             | Unambiguous reciprocal BLAST | Not supported by synteny | Confirmed by Treefam     |
| WBGene00004458 | <i>rpn-1</i>    | CBG05716 |  | 3 | Inf |             | Unambiguous reciprocal BLAST | Not supported by synteny | Confirmed by Treefam     |
| WBGene00001862 | <i>him-3</i>    | CBG02239 |  | 3 |     | 45.17609126 | Unambiguous reciprocal BLAST | Not supported by synteny | Confirmed by Treefam     |
| WBGene00000585 | <i>cogc-2</i>   | CBG00414 |  | 3 | Inf |             | Unambiguous reciprocal BLAST | Supported by synteny     | Confirmed by Treefam     |
| WBGene00018350 | <i>F42C5.10</i> | CBG05835 |  | 3 | Inf |             | Unambiguous reciprocal BLAST | Supported by synteny     | Confirmed by Treefam     |
| WBGene00000292 | <i>cap-1</i>    | CBG05812 |  | 3 | Inf |             | Unambiguous reciprocal BLAST | Supported by synteny     | Confirmed by Treefam     |
| WBGene00004477 | <i>rps-8</i>    | CBG05833 |  | 3 |     | 146.8129134 | Unambiguous reciprocal BLAST | Supported by synteny     | Confirmed by Treefam     |
| WBGene00004411 | <i>rpc-1</i>    | CBG05787 |  | 3 | Inf |             | Unambiguous reciprocal BLAST | Supported by synteny     | Confirmed by Treefam     |
| WBGene00016376 | <i>sec-10</i>   | CBG17671 |  | 3 | Inf |             | Unambiguous reciprocal BLAST | Supported by synteny     | Confirmed by Treefam     |
| WBGene00016374 | <i>swd-2.2</i>  | CBG17669 |  | 3 | Inf |             | Unambiguous reciprocal BLAST | Supported by synteny     | Confirmed by Treefam     |
| WBGene00016698 | <i>C46A5.1</i>  | CBG17666 |  | 3 |     | 104.5228787 | Unambiguous reciprocal BLAST | Supported by synteny     | Not confirmed by Treefam |
| WBGene00002074 | <i>ima-3</i>    | CBG05912 |  | 3 | Inf |             | Unambiguous reciprocal BLAST | Supported by synteny     | Confirmed by Treefam     |
| WBGene00016844 | <i>C50F7.4</i>  | CBG00458 |  | 3 | Inf |             | Unambiguous reciprocal BLAST | Not supported by synteny | Confirmed by Treefam     |
| WBGene00017989 | <i>nal-10</i>   | CBG05918 |  | 3 | Inf |             | Unambiguous reciprocal BLAST | Supported by synteny     | Confirmed by Treefam     |
| WBGene00017997 | <i>F33D4.5</i>  | CBG05941 |  | 3 | Inf |             | Unambiguous reciprocal BLAST | Supported by synteny     | Confirmed by Treefam     |
| WBGene00004471 | <i>rps-2</i>    | CBG17709 |  | 3 |     | 164.2304489 | Unambiguous reciprocal BLAST | Supported by synteny     | Not confirmed by Treefam |
| WBGene00017643 | <i>czw-1</i>    | CBG17717 |  | 3 | Inf |             | Unambiguous reciprocal BLAST | Supported by synteny     | Confirmed by Treefam     |
| WBGene00017642 | <i>F20D12.2</i> | CBG17718 |  | 3 | Inf |             | Unambiguous reciprocal BLAST | Supported by synteny     | Confirmed by Treefam     |
| WBGene00016793 | <i>arp-11</i>   | CBG17701 |  | 3 | Inf |             | Unambiguous reciprocal BLAST | Supported by synteny     | Confirmed by Treefam     |
| WBGene00004101 | <i>hgrs-1</i>   | CBG01567 |  | 3 | Inf |             | Unambiguous reciprocal BLAST | Supported by synteny     | Confirmed by Treefam     |
| WBGene00000183 | <i>arf-3</i>    | CBG17727 |  | 3 |     | 20.52287875 | Unambiguous reciprocal BLAST | Supported by synteny     | Confirmed by Treefam     |
| WBGene00020827 | <i>T26A8.4</i>  | CBG18471 |  | 3 |     | 125.6734159 | Unambiguous reciprocal BLAST | Supported by synteny     | Confirmed by Treefam     |
| WBGene00001051 | <i>cks-1</i>    | CBG15632 |  | 3 |     | 26          | Unambiguous reciprocal BLAST | Supported by synteny     | Confirmed by Treefam     |
| WBGene00001566 | <i>acdH-13</i>  | CBG18508 |  | 3 | Inf |             | Unambiguous reciprocal BLAST | Supported by synteny     | Confirmed by Treefam     |

|                |                  |          |  |       |             |                              |                          |                          |  |
|----------------|------------------|----------|--|-------|-------------|------------------------------|--------------------------|--------------------------|--|
| WBGene00009013 | <i>F21D5.8</i>   | CBG16434 |  | 3     | 86.34242268 | Unambiguous reciprocal BLAST | Supported by synteny     | Confirmed by Treefam     |  |
| WBGene00017075 | <i>D2096.8</i>   | CBG21270 |  | 3     | 139.4771213 | Unambiguous reciprocal BLAST | Supported by synteny     | Confirmed by Treefam     |  |
| WBGene00006374 | <i>syx-4</i>     | CBG08733 |  | 3     | 55.69897    | Unambiguous reciprocal BLAST | Not supported by synteny | Confirmed by Treefam     |  |
| WBGene00017238 | <i>F08B4.7</i>   | CBG19656 |  | 3     | 54.47712125 | Unambiguous reciprocal BLAST | Supported by synteny     | Confirmed by Treefam     |  |
| WBGene00017237 | <i>pole-2</i>    | CBG19657 |  | 3 Inf |             | Unambiguous reciprocal BLAST | Supported by synteny     | Confirmed by Treefam     |  |
| WBGene00008363 | <i>D1046.2</i>   | CBG21722 |  | 3     | 130.5228787 | Unambiguous reciprocal BLAST | Supported by synteny     | Confirmed by Treefam     |  |
| WBGene00009542 | <i>F38E11.5</i>  | CBG21666 |  | 3 Inf |             | Unambiguous reciprocal BLAST | Not supported by synteny | Not confirmed by Treefam |  |
| WBGene00012433 | <i>Y11D7A.9</i>  | CBG15066 |  | 3 Inf |             | Unambiguous reciprocal BLAST | Not supported by synteny | Confirmed by Treefam     |  |
| WBGene00007880 | <i>C33A12.1</i>  | CBG20020 |  | 3     | 102.6690068 | Unambiguous reciprocal BLAST | Supported by synteny     | Confirmed by Treefam     |  |
| WBGene00004463 | <i>rpn-7</i>     | CBG21707 |  | 3 Inf |             | Unambiguous reciprocal BLAST | Supported by synteny     | Confirmed by Treefam     |  |
| WBGene00009882 | <i>vha-17</i>    | CBG21703 |  | 3     | 51.41497335 | Unambiguous reciprocal BLAST | Supported by synteny     | Confirmed by Treefam     |  |
| WBGene00009881 | <i>F49C12.12</i> | CBG21702 |  | 3     | 55.30103    | Unambiguous reciprocal BLAST | Not supported by synteny | Confirmed by Treefam     |  |
| WBGene00010638 | <i>K07F5.14</i>  | CBG03469 |  | 3     | 171.39794   | Unambiguous reciprocal BLAST | Supported by synteny     | Confirmed by Treefam     |  |
| WBGene00009132 | <i>F25H8.2</i>   | CBG03454 |  | 3     | 167.455932  | Unambiguous reciprocal BLAST | Supported by synteny     | Confirmed by Treefam     |  |
| WBGene00011747 | <i>sna-2</i>     | CBG15011 |  | 3 Inf |             | Unambiguous reciprocal BLAST | Supported by synteny     | Confirmed by Treefam     |  |
| WBGene00001395 | <i>fat-3</i>     | CBG03479 |  | 3 Inf |             | Unambiguous reciprocal BLAST | Supported by synteny     | Confirmed by Treefam     |  |
| WBGene00008147 | <i>C47E12.2</i>  | CBG03436 |  | 3 Inf |             | Unambiguous reciprocal BLAST | Supported by synteny     | Confirmed by Treefam     |  |
| WBGene00005663 | <i>sars-1</i>    | CBG03435 |  | 3 Inf |             | Unambiguous reciprocal BLAST | Supported by synteny     | Confirmed by Treefam     |  |
| WBGene00008151 | <i>C47E12.7</i>  | CBG03442 |  | 3 Inf |             | Unambiguous reciprocal BLAST | Supported by synteny     | Confirmed by Treefam     |  |
| WBGene00001188 | <i>egl-20</i>    | CBG03476 |  | 3 Inf |             | Unambiguous reciprocal BLAST | Supported by synteny     | Confirmed by Treefam     |  |
| WBGene00003576 | <i>ndc-80</i>    | CBG23215 |  | 3 Inf |             | Unambiguous reciprocal BLAST | Not supported by synteny | Confirmed by Treefam     |  |
| WBGene00008506 | <i>tkl-1</i>     | CBG03385 |  | 3 Inf |             | Unambiguous reciprocal BLAST | Supported by synteny     | Confirmed by Treefam     |  |
| WBGene00010556 | <i>rack-1</i>    | CBG03402 |  | 3 Inf |             | Unambiguous reciprocal BLAST | Supported by synteny     | Confirmed by Treefam     |  |
| WBGene00001001 | <i>dis-3</i>     | CBG13499 |  | 3 Inf |             | Unambiguous reciprocal BLAST | Not supported by synteny | Confirmed by Treefam     |  |
| WBGene00011223 | <i>R10H10.4</i>  | CBG08380 |  | 3     | 29.34678749 | Unambiguous reciprocal BLAST | Supported by synteny     | Confirmed by Treefam     |  |
| WBGene00013857 | <i>ZC168.3</i>   | CBG17646 |  | 3 Inf |             | Unambiguous reciprocal BLAST | Supported by synteny     | Confirmed by Treefam     |  |
| WBGene00003064 | <i>lpd-8</i>     | CBG24700 |  | 3     | 149.5185139 | Unambiguous reciprocal BLAST | Supported by synteny     | Confirmed by Treefam     |  |
| WBGene00004474 | <i>rps-5</i>     | CBG06011 |  | 3     | 151.0457575 | Unambiguous reciprocal BLAST | Supported by synteny     | Confirmed by Treefam     |  |
| WBGene00004199 | <i>prx-14</i>    | CBG06028 |  | 3     | 142.4819201 | Unambiguous reciprocal BLAST | Supported by synteny     | Confirmed by Treefam     |  |
| WBGene00011128 | <i>R07H5.8</i>   | CBG06032 |  | 3 Inf |             | Unambiguous reciprocal BLAST | Supported by synteny     | Confirmed by Treefam     |  |
| WBGene00007443 | <i>pfd-1</i>     | CBG06021 |  | 3     | 28.17609126 | Unambiguous reciprocal BLAST | Supported by synteny     | Confirmed by Treefam     |  |
| WBGene00002344 | <i>let-70</i>    | CBG06002 |  | 3     | 66          | Unambiguous reciprocal BLAST | Supported by synteny     | Confirmed by Treefam     |  |
| WBGene00011481 | <i>imp-2</i>     | CBG06013 |  | 3 Inf |             | Unambiguous reciprocal BLAST | Supported by synteny     | Confirmed by Treefam     |  |
| WBGene00003081 | <i>lsm-7</i>     | CBG05961 |  | 3     | 52.77815125 | Unambiguous reciprocal BLAST | Supported by synteny     | Confirmed by Treefam     |  |
| WBGene00010847 | <i>M04B2.4</i>   | CBG06141 |  | 3 Inf |             | Unambiguous reciprocal BLAST | Supported by synteny     | Confirmed by Treefam     |  |
| WBGene00009588 | <i>F40F11.3</i>  | CBG06121 |  | 3     | 44.69897    | Unambiguous reciprocal BLAST | Supported by synteny     | Not confirmed by Treefam |  |
| WBGene00004755 | <i>sec-24.1</i>  | CBG06129 |  | 3 Inf |             | Unambiguous reciprocal BLAST | Supported by synteny     | Not confirmed by Treefam |  |
| WBGene00014086 | <i>ZK809.3</i>   | CBG06101 |  | 3     | 152.462398  | Unambiguous reciprocal BLAST | Supported by synteny     | Confirmed by Treefam     |  |
| WBGene00009587 | <i>F40F11.2</i>  | CBG06120 |  | 3 Inf |             | Unambiguous reciprocal BLAST | Supported by synteny     | Not confirmed by Treefam |  |
| WBGene00003218 | <i>mep-1</i>     | CBG06138 |  | 3 Inf |             | Unambiguous reciprocal BLAST | Supported by synteny     | Confirmed by Treefam     |  |
| WBGene00008722 | <i>F12F6.7</i>   | CBG06130 |  | 3 Inf |             | Unambiguous reciprocal BLAST | Supported by synteny     | Confirmed by Treefam     |  |
| WBGene00010231 | <i>F58B3.4</i>   | CBG06109 |  | 3 Inf |             | Unambiguous reciprocal BLAST | Supported by synteny     | Confirmed by Treefam     |  |
| WBGene00009039 | <i>F22B3.8</i>   | CBG03127 |  | 3 Inf |             | Unambiguous reciprocal BLAST | Not supported by synteny | Confirmed by Treefam     |  |
| WBGene00004480 | <i>rps-11</i>    | CBG06118 |  | 3     | 111         | Unambiguous reciprocal BLAST | Supported by synteny     | Confirmed by Treefam     |  |
| WBGene00011740 | <i>T12G3.5</i>   | CBG06212 |  | 3     | 142.6946052 | Unambiguous reciprocal BLAST | Supported by synteny     | Confirmed by Treefam     |  |
| WBGene00004192 | <i>prx-2</i>     | CBG06104 |  | 3     | 166.90309   | Unambiguous reciprocal BLAST | Supported by synteny     | Confirmed by Treefam     |  |
| WBGene00005015 | <i>spt-5</i>     | CBG06217 |  | 3 Inf |             | Unambiguous reciprocal BLAST | Supported by synteny     | Confirmed by Treefam     |  |
| WBGene00003920 | <i>par-5</i>     | CBG06174 |  | 3     | 24.30103    | Unambiguous reciprocal BLAST | Supported by synteny     | Confirmed by Treefam     |  |
| WBGene00008683 | <i>repo-1</i>    | CBG06223 |  | 3     | 161.7781513 | Unambiguous reciprocal BLAST | Supported by synteny     | Confirmed by Treefam     |  |
| WBGene00008684 | <i>mlg-32</i>    | CBG06226 |  | 3 Inf |             | Unambiguous reciprocal BLAST | Supported by synteny     | Confirmed by Treefam     |  |
| WBGene00010890 | <i>ddb-1</i>     | CBG06232 |  | 3 Inf |             | Unambiguous reciprocal BLAST | Supported by synteny     | Confirmed by Treefam     |  |
| WBGene00002368 | <i>let-99</i>    | CBG10071 |  | 3 Inf |             | Unambiguous reciprocal BLAST | Not supported by synteny | Confirmed by Treefam     |  |
| WBGene00004492 | <i>rps-23</i>    | CBG03324 |  | 3     | 93.12493874 | Unambiguous reciprocal BLAST | Supported by synteny     | Confirmed by Treefam     |  |
| WBGene00016581 | <i>C42C1.3</i>   | CBG06264 |  | 3     | 75.77815125 | Unambiguous reciprocal BLAST | Supported by synteny     | Confirmed by Treefam     |  |
| WBGene00004756 | <i>sec-24.2</i>  | CBG03317 |  | 3 Inf |             | Unambiguous reciprocal BLAST | Supported by synteny     | Confirmed by Treefam     |  |
| WBGene00009211 | <i>F28D1.1</i>   | CBG03319 |  | 3 Inf |             | Unambiguous reciprocal BLAST | Supported by synteny     | Confirmed by Treefam     |  |
| WBGene00016583 | <i>tag-335</i>   | CBG06266 |  | 3 Inf |             | Unambiguous reciprocal BLAST | Supported by synteny     | Confirmed by Treefam     |  |
| WBGene00014083 | <i>ZK795.3</i>   | CBG13507 |  | 3 Inf |             | Unambiguous reciprocal BLAST | Supported by synteny     | Confirmed by Treefam     |  |
| WBGene00000705 | <i>col-131</i>   | CBG05547 |  | 3     | 110.3679768 | Unambiguous reciprocal BLAST | Not supported by synteny | Confirmed by Treefam     |  |
| WBGene00004315 | <i>rbd-1</i>     | CBG03493 |  | 3 Inf |             | Unambiguous reciprocal BLAST | Supported by synteny     | Confirmed by Treefam     |  |

|                |                  |           |  |   |             |                              |                          |                          |
|----------------|------------------|-----------|--|---|-------------|------------------------------|--------------------------|--------------------------|
| WBGene00007987 | <i>C36H8.1</i>   | CBG01600  |  | 3 | 33.69897    | Unambiguous reciprocal BLAST | Not supported by synteny | Confirmed by Treefam     |
| WBGene00010437 | <i>JCB.5</i>     | CBG01804  |  | 3 | 159.3710679 | Unambiguous reciprocal BLAST | Supported by synteny     | Confirmed by Treefam     |
| WBGene00013373 | <i>Y62E10A.2</i> | CBG017821 |  | 3 | 51.3357921  | Unambiguous reciprocal BLAST | Supported by synteny     | Confirmed by Treefam     |
| WBGene00004424 | <i>rpl-12</i>    | CBG01806  |  | 3 | 116.0791812 | Unambiguous reciprocal BLAST | Supported by synteny     | Confirmed by Treefam     |
| WBGene00004339 | <i>rfc-3</i>     | CBG01827  |  | 3 | Inf         | Unambiguous reciprocal BLAST | Supported by synteny     | Confirmed by Treefam     |
| WBGene00009926 | <i>noah-2</i>    | CBG18772  |  | 3 | Inf         | Unambiguous reciprocal BLAST | Supported by synteny     | Confirmed by Treefam     |
| WBGene00012887 | <i>Y45F10D.7</i> | CBG22378  |  | 3 | Inf         | Unambiguous reciprocal BLAST | Supported by synteny     | Confirmed by Treefam     |
| WBGene00009925 | <i>F52B11.2</i>  | CBG18762  |  | 3 | 132.2174839 | Unambiguous reciprocal BLAST | Supported by synteny     | Confirmed by Treefam     |
| WBGene00012888 | <i>sas-6</i>     | CBG22377  |  | 3 | Inf         | Unambiguous reciprocal BLAST | Supported by synteny     | Confirmed by Treefam     |
| WBGene00004487 | <i>rps-18</i>    | CBG21507  |  | 3 | 109.39794   | Unambiguous reciprocal BLAST | Supported by synteny     | Confirmed by Treefam     |
| WBGene00013308 | <i>nuo-3</i>     | CBG21512  |  | 3 | 87.92941893 | Unambiguous reciprocal BLAST | Supported by synteny     | Confirmed by Treefam     |
| WBGene00013808 | <i>sfa-1</i>     | CBG00421  |  | 3 | Inf         | Unambiguous reciprocal BLAST | Supported by synteny     | Not confirmed by Treefam |
| WBGene00006698 | <i>uaf-2</i>     | CBG00419  |  | 3 | 155.7781513 | Unambiguous reciprocal BLAST | Supported by synteny     | Confirmed by Treefam     |
| WBGene00004914 | <i>snr-1</i>     | CBG00427  |  | 3 | 84          | Unambiguous reciprocal BLAST | Supported by synteny     | Confirmed by Treefam     |
| WBGene00008707 | <i>F11E6.3</i>   | CBG00436  |  | 3 | 101.69897   | Unambiguous reciprocal BLAST | Supported by synteny     | Confirmed by Treefam     |
| WBGene00006920 | <i>wha-11</i>    | CBG16826  |  | 3 | Inf         | Unambiguous reciprocal BLAST | Supported by synteny     | Confirmed by Treefam     |
| WBGene00001240 | <i>elo-2</i>     | CBG00438  |  | 3 | Inf         | Unambiguous reciprocal BLAST | Supported by synteny     | Confirmed by Treefam     |
| WBGene00004497 | <i>rps-28</i>    | CBG13580  |  | 3 | 39.97772361 | Unambiguous reciprocal BLAST | Supported by synteny     | Confirmed by Treefam     |
| WBGene00021514 | <i>Y41D4B.11</i> | CBG13570  |  | 3 | 149.0791812 | Unambiguous reciprocal BLAST | Supported by synteny     | Confirmed by Treefam     |
| WBGene00021934 | <i>cct-8</i>     | CBG08425  |  | 3 | Inf         | Unambiguous reciprocal BLAST | Supported by synteny     | Confirmed by Treefam     |
| WBGene00022301 | <i>cpsf-1</i>    | CBG16808  |  | 3 | Inf         | Unambiguous reciprocal BLAST | Supported by synteny     | Confirmed by Treefam     |
| WBGene00004496 | <i>rps-27</i>    | CBG06446  |  | 3 | 55.04139269 | Unambiguous reciprocal BLAST | Supported by synteny     | Confirmed by Treefam     |
| WBGene00021000 | <i>W03F9.2</i>   | CBG06454  |  | 3 | 45.69897    | Unambiguous reciprocal BLAST | Not supported by synteny | Confirmed by Treefam     |
| WBGene00000552 | <i>cmd-1</i>     | CBG01097  |  | 3 | 36.57403127 | Unambiguous reciprocal BLAST | Supported by synteny     | Not confirmed by Treefam |
| WBGene00004266 | <i>rab-1</i>     | CBG01077  |  | 3 | 73          | Unambiguous reciprocal BLAST | Supported by synteny     | Confirmed by Treefam     |
| WBGene00020392 | <i>knf-3</i>     | CBG21814  |  | 3 | 51.69897    | Unambiguous reciprocal BLAST | Supported by synteny     | Confirmed by Treefam     |
| WBGene00020340 | <i>T08B1.1</i>   | CBG12142  |  | 3 | Inf         | Unambiguous reciprocal BLAST | Not supported by synteny | Confirmed by Treefam     |
| WBGene00018762 | <i>F53E10.6</i>  | CBG06617  |  | 3 | 76.95424251 | Unambiguous reciprocal BLAST | Supported by synteny     | Confirmed by Treefam     |
| WBGene00019353 | <i>K03B4.1</i>   | CBG08796  |  | 3 | Inf         | Unambiguous reciprocal BLAST | Supported by synteny     | Not confirmed by Treefam |
| WBGene00016508 | <i>C37H5.5</i>   | CBG08826  |  | 3 | Inf         | Unambiguous reciprocal BLAST | Supported by synteny     | Confirmed by Treefam     |
| WBGene00016062 | <i>C24G6.8</i>   | CBG09375  |  | 3 | Inf         | Unambiguous reciprocal BLAST | Supported by synteny     | Confirmed by Treefam     |
| WBGene00003927 | <i>pas-6</i>     | CBG09365  |  | 3 | 140.69897   | Unambiguous reciprocal BLAST | Supported by synteny     | Confirmed by Treefam     |
| WBGene00016989 | <i>CD4.3</i>     | CBG09363  |  | 3 | 121.243038  | Unambiguous reciprocal BLAST | Supported by synteny     | Confirmed by Treefam     |
| WBGene00000159 | <i>aps-1</i>     | CBG09266  |  | 3 | 70.36797679 | Unambiguous reciprocal BLAST | Supported by synteny     | Confirmed by Treefam     |
| WBGene00000802 | <i>crt-1</i>     | CBG09253  |  | 3 | Inf         | Unambiguous reciprocal BLAST | Supported by synteny     | Confirmed by Treefam     |
| WBGene00001073 | <i>dpy-11</i>    | CBG18956  |  | 3 | 132.09691   | Unambiguous reciprocal BLAST | Supported by synteny     | Confirmed by Treefam     |
| WBGene00020425 | <i>syx-18</i>    | CBG18985  |  | 3 | 155.9208188 | Unambiguous reciprocal BLAST | Supported by synteny     | Confirmed by Treefam     |
| WBGene00020950 | <i>W02F12.5</i>  | CBG19001  |  | 3 | Inf         | Unambiguous reciprocal BLAST | Supported by synteny     | Confirmed by Treefam     |
| WBGene00020910 | <i>W01A11.2</i>  | CBG18949  |  | 3 | Inf         | Unambiguous reciprocal BLAST | Supported by synteny     | Confirmed by Treefam     |
| WBGene00001513 | <i>gad-1</i>     | CBG18933  |  | 3 | Inf         | Unambiguous reciprocal BLAST | Supported by synteny     | Confirmed by Treefam     |
| WBGene00020517 | <i>T15B7.2</i>   | CBG19031  |  | 3 | 143.30103   | Unambiguous reciprocal BLAST | Supported by synteny     | Confirmed by Treefam     |
| WBGene00007029 | <i>mys-1</i>     | CBG19077  |  | 3 | Inf         | Unambiguous reciprocal BLAST | Supported by synteny     | Confirmed by Treefam     |
| WBGene00015464 | <i>C05C8.7</i>   | CBG19118  |  | 3 | Inf         | Unambiguous reciprocal BLAST | Not supported by synteny | Confirmed by Treefam     |
| WBGene00015743 | <i>C13F10.4</i>  | CBG19103  |  | 3 | Inf         | Unambiguous reciprocal BLAST | Supported by synteny     | Confirmed by Treefam     |
| WBGene00017313 | <i>cpsf-2</i>    | CBG19097  |  | 3 | Inf         | Unambiguous reciprocal BLAST | Supported by synteny     | Confirmed by Treefam     |
| WBGene00017605 | <i>F19F10.9</i>  | CBG22442  |  | 3 | Inf         | Unambiguous reciprocal BLAST | Supported by synteny     | Confirmed by Treefam     |
| WBGene00002078 | <i>xpo-1</i>     | CBG20576  |  | 3 | Inf         | Unambiguous reciprocal BLAST | Supported by synteny     | Confirmed by Treefam     |
| WBGene00017016 | <i>snap-1</i>    | CBG11346  |  | 3 | 169.7781513 | Unambiguous reciprocal BLAST | Supported by synteny     | Confirmed by Treefam     |
| WBGene00004766 | <i>sel-9</i>     | CBG11296  |  | 3 | 115.2218487 | Unambiguous reciprocal BLAST | Supported by synteny     | Confirmed by Treefam     |
| WBGene00006935 | <i>vars-1</i>    | CBG11384  |  | 3 | Inf         | Unambiguous reciprocal BLAST | Supported by synteny     | Confirmed by Treefam     |
| WBGene00020717 | <i>T23B12.2</i>  | CBG01522  |  | 3 | Inf         | Unambiguous reciprocal BLAST | Supported by synteny     | Confirmed by Treefam     |
| WBGene00001040 | <i>dnj-22</i>    | CBG01519  |  | 3 | 153.8239087 | Unambiguous reciprocal BLAST | Supported by synteny     | Confirmed by Treefam     |
| WBGene00020718 | <i>T23B12.3</i>  | CBG01521  |  | 3 | 168.3424227 | Unambiguous reciprocal BLAST | Supported by synteny     | Confirmed by Treefam     |
| WBGene00017797 | <i>symk-1</i>    | CBG01489  |  | 3 | Inf         | Unambiguous reciprocal BLAST | Supported by synteny     | Confirmed by Treefam     |
| WBGene00003395 | <i>mom-2</i>     | CBG11282  |  | 3 | Inf         | Unambiguous reciprocal BLAST | Supported by synteny     | Confirmed by Treefam     |
| WBGene00009103 | <i>F25B3.6</i>   | CBG19313  |  | 3 | Inf         | Unambiguous reciprocal BLAST | Supported by synteny     | Confirmed by Treefam     |
| WBGene00003160 | <i>mdf-1</i>     | CBG19302  |  | 3 | Inf         | Unambiguous reciprocal BLAST | Supported by synteny     | Not confirmed by Treefam |
| WBGene00004320 | <i>rbx-1</i>     | CBG19342  |  | 3 | 49.69897    | Unambiguous reciprocal BLAST | Supported by synteny     | Confirmed by Treefam     |
| WBGene00007784 | <i>ruvb-1</i>    | CBG19422  |  | 3 | Inf         | Unambiguous reciprocal BLAST | Supported by synteny     | Confirmed by Treefam     |
| WBGene00007097 | <i>B0024.4</i>   | CBG09578  |  | 3 | 71.82390874 | Unambiguous reciprocal BLAST | Supported by synteny     | Confirmed by Treefam     |

|                |                 |          |   |     |             |                              |                          |                          |
|----------------|-----------------|----------|---|-----|-------------|------------------------------|--------------------------|--------------------------|
| WBGene00006489 | <i>tag-143</i>  | CBG09548 | 3 | Inf |             | Unambiguous reciprocal BLAST | Supported by synteny     | Confirmed by Treefam     |
| WBGene00010629 | <i>K07C5.6</i>  | CBG09591 | 3 | Inf |             | Unambiguous reciprocal BLAST | Supported by synteny     | Confirmed by Treefam     |
| WBGene00000200 | <i>arx-2</i>    | CBG09586 | 3 | Inf |             | Unambiguous reciprocal BLAST | Supported by synteny     | Confirmed by Treefam     |
| WBGene00014112 | <i>ZK856.11</i> | CBG09545 | 3 |     | 94.74036269 | Unambiguous reciprocal BLAST | Supported by synteny     | Confirmed by Treefam     |
| WBGene00003065 | <i>lpd-9</i>    | CBG09647 | 3 |     | 34          | Unambiguous reciprocal BLAST | Supported by synteny     | Not confirmed by Treefam |
| WBGene00008380 | <i>D1054.14</i> | CBG09713 | 3 |     | 159.4336556 | Unambiguous reciprocal BLAST | Supported by synteny     | Confirmed by Treefam     |
| WBGene00002985 | <i>lig-1</i>    | CBG09716 | 3 | Inf |             | Unambiguous reciprocal BLAST | Supported by synteny     | Confirmed by Treefam     |
| WBGene00009242 | <i>sre-6</i>    | CBG09696 | 3 | Inf |             | Unambiguous reciprocal BLAST | Supported by synteny     | Confirmed by Treefam     |
| WBGene00010405 | <i>H19N07.1</i> | CBG23104 | 3 | Inf |             | Unambiguous reciprocal BLAST | Supported by synteny     | Confirmed by Treefam     |
| WBGene00002072 | <i>ima-1</i>    | CBG23145 | 3 | Inf |             | Unambiguous reciprocal BLAST | Supported by synteny     | Confirmed by Treefam     |
| WBGene00009966 | <i>F53B7.3</i>  | CBG23070 | 3 |     | 178.0253059 | Unambiguous reciprocal BLAST | Supported by synteny     | Confirmed by Treefam     |
| WBGene00011831 | <i>T19B10.2</i> | CBG23138 | 3 | Inf |             | Unambiguous reciprocal BLAST | Supported by synteny     | Confirmed by Treefam     |
| WBGene00007385 | <i>atp-5</i>    | CBG23108 | 3 |     | 136.2491984 | Unambiguous reciprocal BLAST | Supported by synteny     | Confirmed by Treefam     |
| WBGene00009385 | <i>sas-5</i>    | CBG23306 | 3 |     | 161.09691   | Unambiguous reciprocal BLAST | Supported by synteny     | Confirmed by Treefam     |
| WBGene00000453 | <i>ceh-32</i>   | CBG23282 | 3 | Inf |             | Unambiguous reciprocal BLAST | Supported by synteny     | Confirmed by Treefam     |
| WBGene00008338 | <i>C5A6.9</i>   | CBG23232 | 3 | Inf |             | Unambiguous reciprocal BLAST | Supported by synteny     | Confirmed by Treefam     |
| WBGene00006373 | <i>syx-5</i>    | CBG23272 | 3 | Inf |             | Unambiguous reciprocal BLAST | Supported by synteny     | Confirmed by Treefam     |
| WBGene00004917 | <i>snr-4</i>    | CBG23345 | 3 |     | 48.69897    | Unambiguous reciprocal BLAST | Supported by synteny     | Confirmed by Treefam     |
| WBGene00004501 | <i>rpt-1</i>    | CBG23346 | 3 | Inf |             | Unambiguous reciprocal BLAST | Supported by synteny     | Confirmed by Treefam     |
| WBGene00008645 | <i>F10C2.4</i>  | CBG23360 | 3 | Inf |             | Unambiguous reciprocal BLAST | Supported by synteny     | Confirmed by Treefam     |
| WBGene00001088 | <i>dpy-30</i>   | CBG23403 | 3 |     | 49.30103    | Unambiguous reciprocal BLAST | Supported by synteny     | Not confirmed by Treefam |
| WBGene00000876 | <i>cyl-1</i>    | CBG23348 | 3 |     | 100.5228787 | Unambiguous reciprocal BLAST | Supported by synteny     | Not confirmed by Treefam |
| WBGene00010204 | <i>F57F5.1</i>  | CBG23351 | 3 | Inf |             | Unambiguous reciprocal BLAST | Supported by synteny     | Confirmed by Treefam     |
| WBGene00005018 | <i>sqt-3</i>    | CBG23461 | 3 | Inf |             | Unambiguous reciprocal BLAST | Supported by synteny     | Confirmed by Treefam     |
| WBGene00010093 | <i>capg-2</i>   | CBG23429 | 3 |     |             | Unambiguous reciprocal BLAST | Supported by synteny     | Confirmed by Treefam     |
| WBGene00008452 | <i>mrps-5</i>   | CBG23528 | 3 | Inf |             | Unambiguous reciprocal BLAST | Supported by synteny     | Confirmed by Treefam     |
| WBGene00010097 | <i>F55C5.8</i>  | CBG23435 | 3 | Inf |             | Unambiguous reciprocal BLAST | Supported by synteny     | Confirmed by Treefam     |
| WBGene00012244 | <i>W04D2.5</i>  | CBG23508 | 3 |     | 134.09691   | Unambiguous reciprocal BLAST | Supported by synteny     | Confirmed by Treefam     |
| WBGene00009092 | <i>tomm-20</i>  | CBG23457 | 3 |     | 109.5228787 | Unambiguous reciprocal BLAST | Supported by synteny     | Confirmed by Treefam     |
| WBGene00007585 | <i>C14C10.2</i> | CBG23537 | 3 |     | 148.8750613 | Unambiguous reciprocal BLAST | Supported by synteny     | Not confirmed by Treefam |
| WBGene00007587 | <i>C14C10.4</i> | CBG23538 | 3 | Inf |             | Unambiguous reciprocal BLAST | Supported by synteny     | Confirmed by Treefam     |
| WBGene00010094 | <i>tsfm-1</i>   | CBG23428 | 3 | Inf |             | Unambiguous reciprocal BLAST | Supported by synteny     | Confirmed by Treefam     |
| WBGene00011015 | <i>R04F11.2</i> | CBG23452 | 3 |     | 56.99122608 | Unambiguous reciprocal BLAST | Supported by synteny     | Confirmed by Treefam     |
| WBGene00011247 | <i>R11D1.9</i>  | CBG08570 | 3 |     | 108.80618   | Unambiguous reciprocal BLAST | Supported by synteny     | Confirmed by Treefam     |
| WBGene00004738 | <i>scc-3</i>    | CBG08584 | 3 | Inf |             | Unambiguous reciprocal BLAST | Supported by synteny     | Confirmed by Treefam     |
| WBGene00008343 | <i>C56A3.4</i>  | CBG06679 | 3 |     | 125.6478175 | Unambiguous reciprocal BLAST | Supported by synteny     | Confirmed by Treefam     |
| WBGene00006311 | <i>sun-1</i>    | CBG17722 | 3 | Inf |             | Unambiguous reciprocal BLAST | Not supported by synteny | Confirmed by Treefam     |
| WBGene00009347 | <i>F32H5.1</i>  | CBG17499 | 3 | Inf |             | Unambiguous reciprocal BLAST | Supported by synteny     | Confirmed by Treefam     |
| WBGene00009980 | <i>F53F1.2</i>  | CBG06721 | 3 |     | 67          | Unambiguous reciprocal BLAST | Supported by synteny     | Confirmed by Treefam     |
| WBGene00009993 | <i>F53F4.11</i> | CBG11519 | 3 | Inf |             | Unambiguous reciprocal BLAST | Supported by synteny     | Confirmed by Treefam     |
| WBGene00010425 | <i>lpin-1</i>   | CBG11512 | 3 | Inf |             | Unambiguous reciprocal BLAST | Supported by synteny     | Confirmed by Treefam     |
| WBGene00009811 | <i>F47B8.10</i> | CBG04634 | 3 | Inf |             | Unambiguous reciprocal BLAST | Not supported by synteny | Confirmed by Treefam     |
| WBGene00013025 | <i>vha-13</i>   | CBG04632 | 3 | Inf |             | Unambiguous reciprocal BLAST | Supported by synteny     | Confirmed by Treefam     |
| WBGene00013024 | <i>Y49A3A.1</i> | CBG04633 | 3 | Inf |             | Unambiguous reciprocal BLAST | Supported by synteny     | Confirmed by Treefam     |
| WBGene00007616 | <i>C15H11.8</i> | CBG04618 | 3 |     | 74.34678749 | Unambiguous reciprocal BLAST | Supported by synteny     | Confirmed by Treefam     |
| WBGene00006836 | <i>unc-112</i>  | CBG04558 | 3 | Inf |             | Unambiguous reciprocal BLAST | Supported by synteny     | Confirmed by Treefam     |
| WBGene00009084 | <i>F23B12.7</i> | CBG04610 | 3 | Inf |             | Unambiguous reciprocal BLAST | Supported by synteny     | Confirmed by Treefam     |
| WBGene00009082 | <i>F23B12.5</i> | CBG04612 | 3 | Inf |             | Unambiguous reciprocal BLAST | Supported by synteny     | Confirmed by Treefam     |
| WBGene00008262 | <i>ril-1</i>    | CBG04589 | 3 |     | 87.462398   | Unambiguous reciprocal BLAST | Supported by synteny     | Confirmed by Treefam     |
| WBGene00009650 | <i>F43D2.1</i>  | CBG04574 | 3 |     | 142.7781513 | Unambiguous reciprocal BLAST | Supported by synteny     | Confirmed by Treefam     |
| WBGene00007617 | <i>rrbs-1</i>   | CBG04617 | 3 | Inf |             | Unambiguous reciprocal BLAST | Supported by synteny     | Confirmed by Treefam     |
| WBGene00011318 | <i>cdt-2</i>    | CBG11595 | 3 | Inf |             | Unambiguous reciprocal BLAST | Supported by synteny     | Confirmed by Treefam     |
| WBGene00001423 | <i>fib-1</i>    | CBG11588 | 3 |     | 162.7781513 | Unambiguous reciprocal BLAST | Supported by synteny     | Confirmed by Treefam     |
| WBGene00004485 | <i>rps-16</i>   | CBG11589 | 3 |     | 100.3521825 | Unambiguous reciprocal BLAST | Supported by synteny     | Confirmed by Treefam     |
| WBGene00004452 | <i>rpl-38</i>   | CBG18585 | 3 |     | 42.30103    | Unambiguous reciprocal BLAST | Not supported by synteny | Confirmed by Treefam     |
| WBGene00011687 | <i>T10C6.5</i>  | CBG22646 | 3 |     | 107.366423  | Unambiguous reciprocal BLAST | Supported by synteny     | Confirmed by Treefam     |
| WBGene00012316 | <i>W06H3.3</i>  | CBG23896 | 3 | Inf |             | Unambiguous reciprocal BLAST | Supported by synteny     | Confirmed by Treefam     |
| WBGene00000776 | <i>cpl-1</i>    | CBG22599 | 3 | Inf |             | Unambiguous reciprocal BLAST | Supported by synteny     | Confirmed by Treefam     |
| WBGene00013343 | <i>Y59A8B.6</i> | CBG05596 | 3 | Inf |             | Unambiguous reciprocal BLAST | Supported by synteny     | Confirmed by Treefam     |
| WBGene00001258 | <i>emb-4</i>    | CBG20315 | 3 |     | 129.6532125 | Unambiguous reciprocal BLAST | Supported by synteny     | Not confirmed by Treefam |

|                |                   |          |       |             |                              |                          |                          |
|----------------|-------------------|----------|-------|-------------|------------------------------|--------------------------|--------------------------|
| WBGene00006945 | <i>wars-1</i>     | CBG20320 | 3     | 83.84509804 | Unambiguous reciprocal BLAST | Not supported by synteny | Confirmed by Treefam     |
| WBGene00012692 | <i>Y39B6A.33</i>  | CBG23810 | 3     | 113.1949766 | Unambiguous reciprocal BLAST | Not supported by synteny | Confirmed by Treefam     |
| WBGene00012676 | <i>pro-3</i>      | CBG23585 | 3 Inf |             | Unambiguous reciprocal BLAST | Supported by synteny     | Confirmed by Treefam     |
| WBGene00012830 | <i>Y43F8C.8</i>   | CBG05694 | 3     | 75.43933269 | Unambiguous reciprocal BLAST | Supported by synteny     | Confirmed by Treefam     |
| WBGene00004754 | <i>sec-23</i>     | CBG12918 | 3 Inf |             | Unambiguous reciprocal BLAST | Supported by synteny     | Confirmed by Treefam     |
| WBGene00004413 | <i>rpl-2</i>      | CBG05588 | 3 Inf |             | Unambiguous reciprocal BLAST | Supported by synteny     | Confirmed by Treefam     |
| WBGene00003164 | <i>mdt-6</i>      | CBG19070 | 3     | 124.462398  | Unambiguous reciprocal BLAST | Supported by synteny     | Confirmed by Treefam     |
| WBGene00009289 | <i>exos-7</i>     | CBG05573 | 3     | 166.4259687 | Unambiguous reciprocal BLAST | Supported by synteny     | Confirmed by Treefam     |
| WBGene00022021 | <i>Y61A9LA.10</i> | CBG08772 | 3 Inf |             | Unambiguous reciprocal BLAST | Supported by synteny     | Confirmed by Treefam     |
| WBGene00022861 | <i>dve-1</i>      | CBG08165 | 3 Inf |             | Unambiguous reciprocal BLAST | Not supported by synteny | Confirmed by Treefam     |
| WBGene00020215 | <i>T04G9.4</i>    | CBG08117 | 3 Inf |             | Unambiguous reciprocal BLAST | Supported by synteny     | Confirmed by Treefam     |
| WBGene00003968 | <i>peb-1</i>      | CBG14059 | 3 Inf |             | Unambiguous reciprocal BLAST | Supported by synteny     | Confirmed by Treefam     |
| WBGene00001065 | <i>dpy-3</i>      | CBG14077 | 3     | 25.30103    | Unambiguous reciprocal BLAST | Supported by synteny     | Not confirmed by Treefam |
| WBGene00018703 | <i>sec-3</i>      | CBG14132 | 3 Inf |             | Unambiguous reciprocal BLAST | Supported by synteny     | Confirmed by Treefam     |
| WBGene00015791 | <i>C15C7.5</i>    | CBG14145 | 3     | 73.90308999 | Unambiguous reciprocal BLAST | Supported by synteny     | Not confirmed by Treefam |
| WBGene00000207 | <i>asb-2</i>      | CBG14472 | 3 Inf |             | Unambiguous reciprocal BLAST | Supported by synteny     | Confirmed by Treefam     |
| WBGene00006983 | <i>zig-6</i>      | CBG14634 | 3     | 138         | Unambiguous reciprocal BLAST | Supported by synteny     | Not confirmed by Treefam |
| WBGene00004438 | <i>rpl-25.1</i>   | CBG14529 | 3     | 31.60205999 | Unambiguous reciprocal BLAST | Supported by synteny     | Confirmed by Treefam     |
| WBGene00019760 | <i>calu-1</i>     | CBG14576 | 3 Inf |             | Unambiguous reciprocal BLAST | Supported by synteny     | Confirmed by Treefam     |
| WBGene00003056 | <i>lon-2</i>      | CBG14534 | 3 Inf |             | Unambiguous reciprocal BLAST | Supported by synteny     | Confirmed by Treefam     |
| WBGene00001070 | <i>dpy-8</i>      | CBG14618 | 3 Inf |             | Unambiguous reciprocal BLAST | Supported by synteny     | Not confirmed by Treefam |
| WBGene00000039 | <i>acr-1</i>      | CBG14607 | 3 Inf |             | Unambiguous reciprocal BLAST | Supported by synteny     | Confirmed by Treefam     |
| WBGene00019759 | <i>M03F4.6</i>    | CBG14575 | 3 Inf |             | Unambiguous reciprocal BLAST | Supported by synteny     | Confirmed by Treefam     |
| WBGene00004245 | <i>puf-9</i>      | CBG14762 | 3 Inf |             | Unambiguous reciprocal BLAST | Supported by synteny     | Confirmed by Treefam     |
| WBGene00004788 | <i>sft-4</i>      | CBG14749 | 3 Inf |             | Unambiguous reciprocal BLAST | Supported by synteny     | Confirmed by Treefam     |
| WBGene00006826 | <i>unc-97</i>     | CBG14705 | 3 Inf |             | Unambiguous reciprocal BLAST | Supported by synteny     | Confirmed by Treefam     |
| WBGene00021060 | <i>dct-11</i>     | CBG14761 | 3     | 100.8239087 | Unambiguous reciprocal BLAST | Supported by synteny     | Confirmed by Treefam     |
| WBGene00017716 | <i>F22F4.1</i>    | CBG14814 | 3 Inf |             | Unambiguous reciprocal BLAST | Supported by synteny     | Not confirmed by Treefam |
| WBGene00004219 | <i>ptr-4</i>      | CBG14821 | 3 Inf |             | Unambiguous reciprocal BLAST | Supported by synteny     | Confirmed by Treefam     |
| WBGene00019620 | <i>fah-1</i>      | CBG05065 | 3 Inf |             | Unambiguous reciprocal BLAST | Supported by synteny     | Confirmed by Treefam     |
| WBGene00003053 | <i>lmp-1</i>      | CBG05052 | 3     | 115         | Unambiguous reciprocal BLAST | Supported by synteny     | Confirmed by Treefam     |
| WBGene00015800 | <i>C15H9.4</i>    | CBG14831 | 3 Inf |             | Unambiguous reciprocal BLAST | Supported by synteny     | Confirmed by Treefam     |
| WBGene00000991 | <i>dhs-28</i>     | CBG10899 | 3 Inf |             | Unambiguous reciprocal BLAST | Supported by synteny     | Confirmed by Treefam     |
| WBGene00016913 | <i>lam-2</i>      | CBG10982 | 3 Inf |             | Unambiguous reciprocal BLAST | Supported by synteny     | Confirmed by Treefam     |
| WBGene00004949 | <i>sox-2</i>      | CBG16696 | 3     | 129         | Unambiguous reciprocal BLAST | Supported by synteny     | Confirmed by Treefam     |
| WBGene00017814 | <i>F26A10.2</i>   | CBG16748 | 3 Inf |             | Unambiguous reciprocal BLAST | Supported by synteny     | Not confirmed by Treefam |
| WBGene00000238 | <i>bar-1</i>      | CBG10985 | 3 Inf |             | Unambiguous reciprocal BLAST | Supported by synteny     | Confirmed by Treefam     |
| WBGene00004774 | <i>sem-5</i>      | CBG16856 | 3     | 131.69897   | Unambiguous reciprocal BLAST | Supported by synteny     | Not confirmed by Treefam |
| WBGene00001068 | <i>dpy-6</i>      | CBG22772 | 3     | 110.3467875 | Unambiguous reciprocal BLAST | Supported by synteny     | Not confirmed by Treefam |
| WBGene00003981 | <i>pes-8</i>      | CBG16180 | 3     | 130.30103   | Unambiguous reciprocal BLAST | Supported by synteny     | Confirmed by Treefam     |
| WBGene00000161 | <i>apa-2</i>      | CBG16158 | 3 Inf |             | Unambiguous reciprocal BLAST | Supported by synteny     | Confirmed by Treefam     |
| WBGene00014141 | <i>ZK899.2</i>    | CBG16133 | 3 Inf |             | Unambiguous reciprocal BLAST | Supported by synteny     | Confirmed by Treefam     |
| WBGene00013870 | <i>ZC373.5</i>    | CBG01968 | 3     | 29.54406804 | Unambiguous reciprocal BLAST | Supported by synteny     | Confirmed by Treefam     |
| WBGene00010340 | <i>slcf-1</i>     | CBG04487 | 3 Inf |             | Unambiguous reciprocal BLAST | Supported by synteny     | Confirmed by Treefam     |
| WBGene00001250 | <i>elt-2</i>      | CBG17257 | 3     | 141.1249387 | Unambiguous reciprocal BLAST | Supported by synteny     | Confirmed by Treefam     |
| WBGene00008736 | <i>gnrr-6</i>     | CBG17407 | 3 Inf |             | Unambiguous reciprocal BLAST | Supported by synteny     | Confirmed by Treefam     |
| WBGene00012261 | <i>lpr-3</i>      | CBG17509 | 3 Inf |             | Unambiguous reciprocal BLAST | Supported by synteny     | Confirmed by Treefam     |
| WBGene00012256 | <i>lpr-5</i>      | CBG17507 | 3 Inf |             | Unambiguous reciprocal BLAST | Supported by synteny     | Confirmed by Treefam     |
| WBGene00000750 | <i>col-177</i>    | CBG17531 | 3 Inf |             | Unambiguous reciprocal BLAST | Supported by synteny     | Not confirmed by Treefam |
| WBGene00018957 | <i>F56C11.5</i>   | CBG22009 | 3     | 134.756962  | Unambiguous reciprocal BLAST | Supported by synteny     | Confirmed by Treefam     |
| WBGene00022373 | <i>Y92H12BR.8</i> | CBG15094 | 3 Inf |             | Unambiguous reciprocal BLAST | Not supported by synteny | Confirmed by Treefam     |
| WBGene00000275 | <i>bub-1</i>      | CBG09940 | 3 Inf |             | Unambiguous reciprocal BLAST | Not supported by synteny | Confirmed by Treefam     |
| WBGene00000496 | <i>chs-1</i>      | CBG11891 | 3 Inf |             | Unambiguous reciprocal BLAST | Supported by synteny     | Confirmed by Treefam     |
| WBGene00004305 | <i>ran-4</i>      | CBG12512 | 3     | 80.07918125 | Unambiguous reciprocal BLAST | Supported by synteny     | Confirmed by Treefam     |
| WBGene00004408 | <i>rla-0</i>      | CBG02260 | 3 Inf |             | Unambiguous reciprocal BLAST | Supported by synteny     | Confirmed by Treefam     |
| WBGene00001228 | <i>elf-3.E</i>    | CBG12457 | 3 Inf |             | Unambiguous reciprocal BLAST | Supported by synteny     | Confirmed by Treefam     |
| WBGene00021329 | <i>Y34D9A.3</i>   | CBG22033 | 3     | 33.30103    | Unambiguous reciprocal BLAST | Supported by synteny     | Not confirmed by Treefam |
| WBGene00016356 | <i>C33F10.8</i>   | CBG20764 | 3     | 102.0791812 | Unambiguous reciprocal BLAST | Not supported by synteny | Not confirmed by Treefam |
| WBGene00019022 | <i>F58A6.1</i>    | CBG02334 | 3 Inf |             | Unambiguous reciprocal BLAST | Supported by synteny     | Confirmed by Treefam     |
| WBGene00019061 | <i>F58F12.1</i>   | CBG02643 | 3     | 47.52287875 | Unambiguous reciprocal BLAST | Supported by synteny     | Confirmed by Treefam     |



|                |                  |          |   |             |                              |                          |                          |
|----------------|------------------|----------|---|-------------|------------------------------|--------------------------|--------------------------|
| WBGene00018395 | <i>F43E2.7</i>   | CBG13150 | 3 | 169.1139434 | Unambiguous reciprocal BLAST | Supported by synteny     | Confirmed by Treefam     |
| WBGene00007561 | <i>C14A4.11</i>  | CBG03050 | 3 | 109.39794   | Unambiguous reciprocal BLAST | Supported by synteny     | Confirmed by Treefam     |
| WBGene00004454 | <i>rpl-41</i>    | CBG02971 | 3 | 55.69897    | Unambiguous reciprocal BLAST | Supported by synteny     | Confirmed by Treefam     |
| WBGene00010809 | <i>M01F1.3</i>   | CBG09779 | 3 | Inf         | Unambiguous reciprocal BLAST | Supported by synteny     | Not confirmed by Treefam |
| WBGene00006946 | <i>wars-2</i>    | CBG21169 | 3 | Inf         | Unambiguous reciprocal BLAST | Supported by synteny     | Confirmed by Treefam     |
| WBGene00000229 | <i>atp-2</i>     | CBG21173 | 3 | Inf         | Unambiguous reciprocal BLAST | Supported by synteny     | Confirmed by Treefam     |
| WBGene00020441 | <i>T12A2.7</i>   | CBG17487 | 3 | 150.2710668 | Unambiguous reciprocal BLAST | Supported by synteny     | Not confirmed by Treefam |
| WBGene00015104 | <i>B0280.9</i>   | CBG16596 | 3 | Inf         | Unambiguous reciprocal BLAST | Supported by synteny     | Confirmed by Treefam     |
| WBGene00015160 | <i>B0361.6</i>   | CBG24142 | 3 | Inf         | Unambiguous reciprocal BLAST | Supported by synteny     | Confirmed by Treefam     |
| WBGene00007000 | <i>tufm-1</i>    | CBG00491 | 3 | Inf         | Unambiguous reciprocal BLAST | Not supported by synteny | Confirmed by Treefam     |
| WBGene00004427 | <i>rpl-15</i>    | CBG21258 | 3 | 131.09691   | Unambiguous reciprocal BLAST | Supported by synteny     | Confirmed by Treefam     |
| WBGene00005662 | <i>sars-2</i>    | CBG01669 | 3 | Inf         | Unambiguous reciprocal BLAST | Not supported by synteny | Confirmed by Treefam     |
| WBGene00019162 | <i>eif-1.A</i>   | CBG11654 | 3 | 111.4983106 | Unambiguous reciprocal BLAST | Supported by synteny     | Confirmed by Treefam     |
| WBGene00009006 | <i>F21D5.1</i>   | CBG16451 | 3 | Inf         | Unambiguous reciprocal BLAST | Not supported by synteny | Confirmed by Treefam     |
| WBGene00003066 | <i>lpl-1</i>     | CBG21764 | 3 | 50          | Unambiguous reciprocal BLAST | Supported by synteny     | Not confirmed by Treefam |
| WBGene00007108 | <i>gspd-1</i>    | CBG06072 | 3 | Inf         | Unambiguous reciprocal BLAST | Supported by synteny     | Confirmed by Treefam     |
| WBGene00007110 | <i>B0035.11</i>  | CBG06074 | 3 | Inf         | Unambiguous reciprocal BLAST | Not supported by synteny | Confirmed by Treefam     |
| WBGene00007111 | <i>B0035.12</i>  | CBG06075 | 3 | Inf         | Unambiguous reciprocal BLAST | Supported by synteny     | Confirmed by Treefam     |
| WBGene00013109 | <i>Y51H4A.15</i> | CBG13670 | 3 | 77.30103    | Unambiguous reciprocal BLAST | Not supported by synteny | Confirmed by Treefam     |
| WBGene00013998 | <i>ZK550.4</i>   | CBG00367 | 3 | Inf         | Unambiguous reciprocal BLAST | Supported by synteny     | Not confirmed by Treefam |
| WBGene00020269 | <i>T05H4.Ga</i>  | CBG18934 | 3 | Inf         | Unambiguous reciprocal BLAST | Supported by synteny     | Confirmed by Treefam     |
| WBGene00004453 | <i>rpl-39</i>    | CBG20586 | 3 | 29.07003787 | Unambiguous reciprocal BLAST | Supported by synteny     | Confirmed by Treefam     |
| WBGene00009223 | <i>F28F8.5</i>   | CBG18601 | 3 | 53.41497335 | Unambiguous reciprocal BLAST | Not supported by synteny | Not confirmed by Treefam |
| WBGene00008441 | <i>E01B7.1</i>   | CBG05586 | 3 | 142.6320232 | Unambiguous reciprocal BLAST | Not supported by synteny | Not confirmed by Treefam |
| WBGene00007938 | <i>C34F6.1</i>   | CBG17404 | 3 | Inf         | Unambiguous reciprocal BLAST | Supported by synteny     | Confirmed by Treefam     |
| WBGene00004746 | <i>sdc-2</i>     | CBG17307 | 3 | 157.853872  | Unambiguous reciprocal BLAST | Supported by synteny     | Confirmed by Treefam     |
| WBGene0001981  | <i>hnd-1</i>     | CBG15519 | 3 | 20.69897    | Unambiguous reciprocal BLAST | Not supported by synteny | Not confirmed by Treefam |
| WBGene00009725 | <i>F45E6.1</i>   | CBG00119 | 3 | 53.462398   | Unambiguous reciprocal BLAST | Supported by synteny     | Not confirmed by Treefam |
| WBGene00007287 | <i>gck-4</i>     | CBG07389 | 3 | Inf         | Unambiguous reciprocal BLAST | Supported by synteny     | Confirmed by Treefam     |
| WBGene00007848 | <i>C31E10.7</i>  | CBG07320 | 3 | 53.17609126 | Unambiguous reciprocal BLAST | Supported by synteny     | Confirmed by Treefam     |
| WBGene00010993 | <i>R03E1.2</i>   | CBG16307 | 3 | Inf         | Unambiguous reciprocal BLAST | Not supported by synteny | Confirmed by Treefam     |
| WBGene00007529 | <i>C11H1.3</i>   | CBG07248 | 3 | Inf         | Unambiguous reciprocal BLAST | Supported by synteny     | Confirmed by Treefam     |
| WBGene00006743 | <i>unc-3</i>     | CBG07590 | 3 | Inf         | Unambiguous reciprocal BLAST | Supported by synteny     | Confirmed by Treefam     |
| WBGene00007175 | <i>B0395.3</i>   | CBG16408 | 3 | Inf         | Unambiguous reciprocal BLAST | Supported by synteny     | Confirmed by Treefam     |
| WBGene00020848 | <i>ztf-19</i>    | CBG16356 | 3 | Inf         | Unambiguous reciprocal BLAST | Supported by synteny     | Confirmed by Treefam     |
| WBGene00004259 | <i>pyr-1</i>     | CBG00515 | 3 | Inf         | Unambiguous reciprocal BLAST | Supported by synteny     | Confirmed by Treefam     |
| WBGene00010458 | <i>K01C8.6</i>   | CBG00671 | 3 | 154.2730013 | Unambiguous reciprocal BLAST | Supported by synteny     | Confirmed by Treefam     |
| WBGene00001840 | <i>hel-1</i>     | CBG00694 | 3 | Inf         | Unambiguous reciprocal BLAST | Supported by synteny     | Confirmed by Treefam     |
| WBGene00004421 | <i>rpl-10</i>    | CBG00744 | 3 | 149.447158  | Unambiguous reciprocal BLAST | Supported by synteny     | Confirmed by Treefam     |
| WBGene00011040 | <i>R05H5.5</i>   | CBG00899 | 3 | 116.1962946 | Unambiguous reciprocal BLAST | Not supported by synteny | Confirmed by Treefam     |
| WBGene00010325 | <i>exos-3</i>    | CBG02224 | 3 | 142.9542425 | Unambiguous reciprocal BLAST | Supported by synteny     | Confirmed by Treefam     |
| WBGene00001102 | <i>dsh-2</i>     | CBG02318 | 3 | Inf         | Unambiguous reciprocal BLAST | Supported by synteny     | Confirmed by Treefam     |
| WBGene00015916 | <i>C17G10.2</i>  | CBG02451 | 3 | Inf         | Unambiguous reciprocal BLAST | Supported by synteny     | Confirmed by Treefam     |
| WBGene00000252 | <i>bli-2</i>     | CBG02463 | 3 | 62.30103    | Unambiguous reciprocal BLAST | Supported by synteny     | Confirmed by Treefam     |
| WBGene00004478 | <i>rps-9</i>     | CBG02962 | 3 | 124         | Unambiguous reciprocal BLAST | Supported by synteny     | Confirmed by Treefam     |
| WBGene00000251 | <i>bli-1</i>     | CBG03026 | 3 | Inf         | Unambiguous reciprocal BLAST | Supported by synteny     | Confirmed by Treefam     |
| WBGene00001580 | <i>gex-3</i>     | CBG03329 | 3 | Inf         | Unambiguous reciprocal BLAST | Supported by synteny     | Confirmed by Treefam     |
| WBGene00012342 | <i>mtr-4</i>     | CBG03473 | 3 | Inf         | Unambiguous reciprocal BLAST | Supported by synteny     | Confirmed by Treefam     |
| WBGene00001076 | <i>dpy-17</i>    | CBG03553 | 3 | Inf         | Unambiguous reciprocal BLAST | Supported by synteny     | Confirmed by Treefam     |
| WBGene00000788 | <i>cpz-1</i>     | CBG04105 | 3 | Inf         | Unambiguous reciprocal BLAST | Supported by synteny     | Confirmed by Treefam     |
| WBGene00018772 | <i>F53G12.4</i>  | CBG05101 | 3 | 23.17609126 | Unambiguous reciprocal BLAST | Supported by synteny     | Not confirmed by Treefam |
| WBGene00022043 | <i>Y65B4BR.8</i> | CBG05113 | 3 | 103.3222193 | Unambiguous reciprocal BLAST | Supported by synteny     | Confirmed by Treefam     |
| WBGene00001074 | <i>dpy-13</i>    | CBG05353 | 3 | 47.69897    | Unambiguous reciprocal BLAST | Supported by synteny     | Confirmed by Treefam     |
| WBGene00001043 | <i>dny-25</i>    | CBG05578 | 3 | Inf         | Unambiguous reciprocal BLAST | Supported by synteny     | Confirmed by Treefam     |
| WBGene00001079 | <i>dpy-20</i>    | CBG06089 | 3 | Inf         | Unambiguous reciprocal BLAST | Supported by synteny     | Confirmed by Treefam     |
| WBGene00002363 | <i>let-92</i>    | CBG06179 | 3 | Inf         | Unambiguous reciprocal BLAST | Supported by synteny     | Confirmed by Treefam     |
| WBGene00015075 | <i>B0238.11</i>  | CBG06777 | 3 | 77.56427143 | Unambiguous reciprocal BLAST | Supported by synteny     | Not confirmed by Treefam |
| WBGene00001234 | <i>eif-6</i>     | CBG07937 | 3 | 173.50515   | Unambiguous reciprocal BLAST | Supported by synteny     | Confirmed by Treefam     |
| WBGene00018213 | <i>F39H12.2</i>  | CBG08107 | 3 | 47.15490196 | Unambiguous reciprocal BLAST | Supported by synteny     | Confirmed by Treefam     |
| WBGene00020216 | <i>trap-2</i>    | CBG08120 | 3 | 106.30103   | Unambiguous reciprocal BLAST | Supported by synteny     | Confirmed by Treefam     |

|                |                  |          |   |             |                                |                          |                          |
|----------------|------------------|----------|---|-------------|--------------------------------|--------------------------|--------------------------|
| WBGene0000437  | <i>ceh-13</i>    | CBG09160 | 3 | 77.52287875 | Unambiguous reciprocal BLAST   | Supported by synteny     | Confirmed by Treefam     |
| WBGene00022577 | <i>ZC250.3</i>   | CBG09317 | 3 | Inf         | Unambiguous reciprocal BLAST   | Supported by synteny     | Confirmed by Treefam     |
| WBGene00017772 | <i>clec-1</i>    | CBG09340 | 3 | 101.154902  | Unambiguous reciprocal BLAST   | Supported by synteny     | Confirmed by Treefam     |
| WBGene00010627 | <i>K07C5.4</i>   | CBG09590 | 3 | Inf         | Unambiguous reciprocal BLAST   | Supported by synteny     | Confirmed by Treefam     |
| WBGene00005022 | <i>sqw-4</i>     | CBG09668 | 3 | Inf         | Unambiguous reciprocal BLAST   | Supported by synteny     | Confirmed by Treefam     |
| WBGene00006540 | <i>tbq-1</i>     | CBG10035 | 3 | Inf         | Unambiguous reciprocal BLAST   | Supported by synteny     | Confirmed by Treefam     |
| WBGene00003934 | <i>pat-10</i>    | CBG10771 | 3 | 61.60205999 | Unambiguous reciprocal BLAST   | Supported by synteny     | Confirmed by Treefam     |
| WBGene00001064 | <i>dpy-2</i>     | CBG11229 | 3 | Inf         | Unambiguous reciprocal BLAST   | Supported by synteny     | Not confirmed by Treefam |
| WBGene00004919 | <i>snr-6</i>     | CBG11756 | 3 | 54.90308999 | Unambiguous reciprocal BLAST   | Supported by synteny     | Confirmed by Treefam     |
| WBGene00013709 | <i>csnk-1</i>    | CBG12215 | 3 | Inf         | Unambiguous reciprocal BLAST   | Supported by synteny     | Confirmed by Treefam     |
| WBGene00007707 | <i>C25A1.5</i>   | CBG12227 | 3 | Inf         | Unambiguous reciprocal BLAST   | Supported by synteny     | Confirmed by Treefam     |
| WBGene00016750 | <i>C48E7.2</i>   | CBG12577 | 3 | Inf         | Unambiguous reciprocal BLAST   | Supported by synteny     | Confirmed by Treefam     |
| WBGene00004273 | <i>rab-10</i>    | CBG12631 | 3 | 54.69897    | Unambiguous reciprocal BLAST   | Supported by synteny     | Confirmed by Treefam     |
| WBGene00001627 | <i>gly-2</i>     | CBG12645 | 3 | Inf         | Unambiguous reciprocal BLAST   | Not supported by synteny | Confirmed by Treefam     |
| WBGene00000896 | <i>dad-1</i>     | CBG12659 | 3 | 70.24303805 | Unambiguous reciprocal BLAST   | Supported by synteny     | Confirmed by Treefam     |
| WBGene00019323 | <i>teg-4</i>     | CBG12757 | 3 | Inf         | Unambiguous reciprocal BLAST   | Supported by synteny     | Confirmed by Treefam     |
| WBGene00003012 | <i>lin-26</i>    | CBG13032 | 3 | Inf         | Unambiguous reciprocal BLAST   | Supported by synteny     | Confirmed by Treefam     |
| WBGene00007021 | <i>immp-1</i>    | CBG13223 | 3 | 64.05799195 | Unambiguous reciprocal BLAST   | Supported by synteny     | Confirmed by Treefam     |
| WBGene00001186 | <i>egl-18</i>    | CBG13548 | 3 | 52.17609126 | Unambiguous reciprocal BLAST   | Supported by synteny     | Confirmed by Treefam     |
| WBGene00001066 | <i>dpy-4</i>     | CBG13781 | 3 | 30.45593196 | Unambiguous reciprocal BLAST   | Supported by synteny     | Confirmed by Treefam     |
| WBGene00000049 | <i>acr-10</i>    | CBG14329 | 3 | Inf         | Unambiguous reciprocal BLAST   | Supported by synteny     | Confirmed by Treefam     |
| WBGene00018893 | <i>tag-345</i>   | CBG14922 | 3 | Inf         | Unambiguous reciprocal BLAST   | Supported by synteny     | Confirmed by Treefam     |
| WBGene00021644 | <i>Y47G6A.18</i> | CBG14940 | 3 | Inf         | Unambiguous reciprocal BLAST   | Supported by synteny     | Confirmed by Treefam     |
| WBGene00003162 | <i>mdh-2</i>     | CBG15213 | 3 | Inf         | Unambiguous reciprocal BLAST   | Supported by synteny     | Confirmed by Treefam     |
| WBGene00006728 | <i>ubq-2</i>     | CBG15773 | 3 | 42.82390874 | Unambiguous reciprocal BLAST   | Supported by synteny     | Confirmed by Treefam     |
| WBGene00002845 | <i>let-711</i>   | CBG16483 | 3 | Inf         | Unambiguous reciprocal BLAST   | Supported by synteny     | Confirmed by Treefam     |
| WBGene00020112 | <i>pf4-5</i>     | CBG16620 | 3 | 98.14612804 | Unambiguous reciprocal BLAST   | Supported by synteny     | Confirmed by Treefam     |
| WBGene00001069 | <i>dpy-7</i>     | CBG16719 | 3 | 93.65321251 | Unambiguous reciprocal BLAST   | Supported by synteny     | Confirmed by Treefam     |
| WBGene00008021 | <i>C39B10.1</i>  | CBG17255 | 3 | Inf         | Unambiguous reciprocal BLAST   | Supported by synteny     | Confirmed by Treefam     |
| WBGene00011460 | <i>ttr-14</i>    | CBG17593 | 3 | 124.30103   | Unambiguous reciprocal BLAST   | Supported by synteny     | Confirmed by Treefam     |
| WBGene00021714 | <i>cyh-1</i>     | CBG17764 | 3 | Inf         | Unambiguous reciprocal BLAST   | Supported by synteny     | Confirmed by Treefam     |
| WBGene00016449 | <i>C35D10.13</i> | CBG17949 | 3 | 41.50060235 | Unambiguous reciprocal BLAST   | Not supported by synteny | Confirmed by Treefam     |
| WBGene00004470 | <i>rps-1</i>     | CBG18056 | 3 | Inf         | Unambiguous reciprocal BLAST   | Supported by synteny     | Confirmed by Treefam     |
| WBGene00017830 | <i>rpb-8</i>     | CBG18189 | 3 | 102.4313638 | Unambiguous reciprocal BLAST   | Supported by synteny     | Confirmed by Treefam     |
| WBGene00016142 | <i>C26E6.6</i>   | CBG18195 | 3 | Inf         | Unambiguous reciprocal BLAST   | Supported by synteny     | Confirmed by Treefam     |
| WBGene00016166 | <i>C27F2.4</i>   | CBG18202 | 3 | Inf         | Unambiguous reciprocal BLAST   | Supported by synteny     | Confirmed by Treefam     |
| WBGene00003017 | <i>lin-31</i>    | CBG18439 | 3 | 62.30103    | Unambiguous reciprocal BLAST   | Supported by synteny     | Confirmed by Treefam     |
| WBGene00004038 | <i>plc-3</i>     | CBG18715 | 3 | Inf         | Unambiguous reciprocal BLAST   | Not supported by synteny | Confirmed by Treefam     |
| WBGene00020275 | <i>atp-4</i>     | CBG18931 | 3 | 85.62324929 | Unambiguous reciprocal BLAST   | Supported by synteny     | Not confirmed by Treefam |
| WBGene00004482 | <i>rps-13</i>    | CBG19687 | 3 | 105.1303338 | Unambiguous reciprocal BLAST   | Supported by synteny     | Confirmed by Treefam     |
| WBGene00012354 | <i>W09C5.8</i>   | CBG19770 | 3 | 119.4842998 | Unambiguous reciprocal BLAST   | Supported by synteny     | Confirmed by Treefam     |
| WBGene00016291 | <i>C31H1.8</i>   | CBG19851 | 3 | Inf         | Unambiguous reciprocal BLAST   | Not supported by synteny | Confirmed by Treefam     |
| WBGene00007623 | <i>C16C10.2</i>  | CBG20157 | 3 | 167.8920946 | Unambiguous reciprocal BLAST   | Not supported by synteny | Confirmed by Treefam     |
| WBGene00019630 | <i>apc-16</i>    | CBG21326 | 3 | 39.69019608 | Unambiguous reciprocal BLAST   | Supported by synteny     | Not confirmed by Treefam |
| WBGene00022035 | <i>Y65B4BL.3</i> | CBG22667 | 3 | 124.6690068 | Unambiguous reciprocal BLAST   | Supported by synteny     | Not confirmed by Treefam |
| WBGene00005237 | <i>srh-11</i>    | CBG22745 | 3 | 121.1760913 | Unambiguous reciprocal BLAST   | Supported by synteny     | Confirmed by Treefam     |
| WBGene00004806 | <i>skp-1</i>     | CBG23295 | 3 | Inf         | Unambiguous reciprocal BLAST   | Supported by synteny     | Confirmed by Treefam     |
| WBGene00020181 | <i>T02H6.11</i>  | CBG23568 | 3 | 89.32221929 | Unambiguous reciprocal BLAST   | Not supported by synteny | Confirmed by Treefam     |
| WBGene00001872 | <i>him-14</i>    | CBG24743 | 3 | Inf         | Unambiguous reciprocal BLAST   | Not supported by synteny | Confirmed by Treefam     |
| WBGene00003229 | <i>mex-3</i>     | CBG05100 | 2 | 0           | Possible alternative BLAST hit | Supported by synteny     | Confirmed by Treefam     |
| WBGene00001814 | <i>haf-4</i>     | CBG22668 | 2 | 0           | Possible alternative BLAST hit | Supported by synteny     | Confirmed by Treefam     |
| WBGene00004217 | <i>ptr-2</i>     | CBG12004 | 2 | 0           | Possible alternative BLAST hit | Supported by synteny     | Confirmed by Treefam     |
| WBGene00006751 | <i>unc-11</i>    | CBG12008 | 2 | 0           | Possible alternative BLAST hit | Supported by synteny     | Confirmed by Treefam     |
| WBGene00000197 | <i>aars-2</i>    | CBG12085 | 2 | 0           | Possible alternative BLAST hit | Supported by synteny     | Confirmed by Treefam     |
| WBGene00006820 | <i>unc-89</i>    | CBG12070 | 2 | 0           | Possible alternative BLAST hit | Supported by synteny     | Confirmed by Treefam     |
| WBGene00015697 | <i>C10H11.8</i>  | CBG03961 | 2 | 0           | Possible alternative BLAST hit | Supported by synteny     | Confirmed by Treefam     |
| WBGene00000150 | <i>apm-1</i>     | CBG12329 | 2 | 0           | Possible alternative BLAST hit | Supported by synteny     | Confirmed by Treefam     |
| WBGene00004087 | <i>ppk-1</i>     | CBG12324 | 2 | 0           | Possible alternative BLAST hit | Supported by synteny     | Confirmed by Treefam     |
| WBGene00001333 | <i>erm-1</i>     | CBG12867 | 2 | 0           | Possible alternative BLAST hit | Supported by synteny     | Confirmed by Treefam     |
| WBGene00003792 | <i>npp-6</i>     | CBG23742 | 2 | 0           | Possible alternative BLAST hit | Supported by synteny     | Confirmed by Treefam     |

|                |                  |          |   |             |                                |                      |                      |
|----------------|------------------|----------|---|-------------|--------------------------------|----------------------|----------------------|
| WBGene00015092 | <i>B0261.4</i>   | CBG12849 | 2 | 0.045757491 | Possible alternative BLAST hit | Supported by synteny | Confirmed by Treefam |
| WBGene00000230 | <i>atp-3</i>     | CBG12309 | 2 | 0.301029996 | Possible alternative BLAST hit | Supported by synteny | Confirmed by Treefam |
| WBGene00001497 | <i>fars-1</i>    | CBG12564 | 2 | 0           | Possible alternative BLAST hit | Supported by synteny | Confirmed by Treefam |
| WBGene00016422 | <i>noah-1</i>    | CBG04015 | 2 | 0           | Possible alternative BLAST hit | Supported by synteny | Confirmed by Treefam |
| WBGene00004068 | <i>pnk-1</i>     | CBG12583 | 2 | 0           | Possible alternative BLAST hit | Supported by synteny | Confirmed by Treefam |
| WBGene00019000 | <i>let-607</i>   | CBG12652 | 2 | 0           | Possible alternative BLAST hit | Supported by synteny | Confirmed by Treefam |
| WBGene00001596 | <i>gld-2</i>     | CBG12609 | 2 | 0           | Possible alternative BLAST hit | Supported by synteny | Confirmed by Treefam |
| WBGene00000871 | <i>cye-1</i>     | CBG12774 | 2 | 0           | Possible alternative BLAST hit | Supported by synteny | Confirmed by Treefam |
| WBGene00016493 | <i>C37A2.7</i>   | CBG12770 | 2 | 13.35218252 | Possible alternative BLAST hit | Supported by synteny | Confirmed by Treefam |
| WBGene00011064 | <i>R06C7.5</i>   | CBG21917 | 2 | 0           | Possible alternative BLAST hit | Supported by synteny | Confirmed by Treefam |
| WBGene00003622 | <i>nhr-23</i>    | CBG21929 | 2 | 0           | Possible alternative BLAST hit | Supported by synteny | Confirmed by Treefam |
| WBGene00006754 | <i>unc-15</i>    | CBG11932 | 2 | 0           | Possible alternative BLAST hit | Supported by synteny | Confirmed by Treefam |
| WBGene00003777 | <i>nmy-2</i>     | CBG08250 | 2 | 0           | Possible alternative BLAST hit | Supported by synteny | Confirmed by Treefam |
| WBGene00003183 | <i>mei-1</i>     | CBG04086 | 2 | 0           | Possible alternative BLAST hit | Supported by synteny | Confirmed by Treefam |
| WBGene00003596 | <i>ngp-1</i>     | CBG04042 | 2 | 0           | Possible alternative BLAST hit | Supported by synteny | Confirmed by Treefam |
| WBGene00011631 | <i>T08G11.4</i>  | CBG12390 | 2 | 0           | Possible alternative BLAST hit | Supported by synteny | Confirmed by Treefam |
| WBGene00000209 | <i>asg-1</i>     | CBG12341 | 2 | 11.39794001 | Possible alternative BLAST hit | Supported by synteny | Confirmed by Treefam |
| WBGene00001568 | <i>gei-11</i>    | CBG12402 | 2 | 0           | Possible alternative BLAST hit | Supported by synteny | Confirmed by Treefam |
| WBGene00006577 | <i>tlf-1</i>     | CBG12345 | 2 | 0           | Possible alternative BLAST hit | Supported by synteny | Confirmed by Treefam |
| WBGene00001167 | <i>eef-2</i>     | CBG16945 | 2 | 0           | Possible alternative BLAST hit | Supported by synteny | Confirmed by Treefam |
| WBGene00009498 | <i>tat-5</i>     | CBG16933 | 2 | 0           | Possible alternative BLAST hit | Supported by synteny | Confirmed by Treefam |
| WBGene00003026 | <i>lin-41</i>    | CBG22026 | 2 | 0           | Possible alternative BLAST hit | Supported by synteny | Confirmed by Treefam |
| WBGene00004887 | <i>smn-1</i>     | CBG24493 | 2 | 2.602059991 | Possible alternative BLAST hit | Supported by synteny | Confirmed by Treefam |
| WBGene00001574 | <i>gei-17</i>    | CBG12444 | 2 | 0           | Possible alternative BLAST hit | Supported by synteny | Confirmed by Treefam |
| WBGene00009939 | <i>ztf-11</i>    | CBG03854 | 2 | 0           | Possible alternative BLAST hit | Supported by synteny | Confirmed by Treefam |
| WBGene00001582 | <i>gfi-2</i>     | CBG03811 | 2 | 0           | Possible alternative BLAST hit | Supported by synteny | Confirmed by Treefam |
| WBGene00006528 | <i>tba-1</i>     | CBG03797 | 2 | 0           | Possible alternative BLAST hit | Supported by synteny | Confirmed by Treefam |
| WBGene00007054 | <i>scpl-1</i>    | CBG03870 | 2 | 0           | Possible alternative BLAST hit | Supported by synteny | Confirmed by Treefam |
| WBGene00003847 | <i>blmp-1</i>    | CBG02201 | 2 | 0           | Possible alternative BLAST hit | Supported by synteny | Confirmed by Treefam |
| WBGene00008666 | <i>F10G8.8</i>   | CBG03790 | 2 | 0           | Possible alternative BLAST hit | Supported by synteny | Confirmed by Treefam |
| WBGene00003902 | <i>pab-1</i>     | CBG02207 | 2 | 0           | Possible alternative BLAST hit | Supported by synteny | Confirmed by Treefam |
| WBGene00015235 | <i>cdc-26</i>    | CBG12458 | 2 | 2           | Possible alternative BLAST hit | Supported by synteny | Confirmed by Treefam |
| WBGene00004190 | <i>pars-2</i>    | CBG23667 | 2 | 19.69897    | Possible alternative BLAST hit | Supported by synteny | Confirmed by Treefam |
| WBGene00010419 | <i>H28O16.1</i>  | CBG08717 | 2 | 0           | Possible alternative BLAST hit | Supported by synteny | Confirmed by Treefam |
| WBGene00006529 | <i>tba-2</i>     | CBG07939 | 2 | 0           | Possible alternative BLAST hit | Supported by synteny | Confirmed by Treefam |
| WBGene00012386 | <i>agef-1</i>    | CBG19779 | 2 | 0           | Possible alternative BLAST hit | Supported by synteny | Confirmed by Treefam |
| WBGene00013676 | <i>ekl-4</i>     | CBG08755 | 2 | 0           | Possible alternative BLAST hit | Supported by synteny | Confirmed by Treefam |
| WBGene00009284 | <i>F31C3.2</i>   | CBG19735 | 2 | 0           | Possible alternative BLAST hit | Supported by synteny | Confirmed by Treefam |
| WBGene00022042 | <i>Y65B4BR.5</i> | CBG05114 | 2 | 0.176091259 | Possible alternative BLAST hit | Supported by synteny | Confirmed by Treefam |
| WBGene00003836 | <i>nxt-1</i>     | CBG04218 | 2 | 5.756961951 | Possible alternative BLAST hit | Supported by synteny | Confirmed by Treefam |
| WBGene00001340 | <i>etr-1</i>     | CBG06972 | 2 | 0           | Possible alternative BLAST hit | Supported by synteny | Confirmed by Treefam |
| WBGene00004504 | <i>rpt-4</i>     | CBG07004 | 2 | 0           | Possible alternative BLAST hit | Supported by synteny | Confirmed by Treefam |
| WBGene00021097 | <i>cdc-37</i>    | CBG07091 | 2 | 0           | Possible alternative BLAST hit | Supported by synteny | Confirmed by Treefam |
| WBGene00003825 | <i>ntl-2</i>     | CBG03676 | 2 | 0           | Possible alternative BLAST hit | Supported by synteny | Confirmed by Treefam |
| WBGene00022765 | <i>ZK546.14</i>  | CBG02284 | 2 | 0           | Possible alternative BLAST hit | Supported by synteny | Confirmed by Treefam |
| WBGene00006997 | <i>zyg-12</i>    | CBG02287 | 2 | 0           | Possible alternative BLAST hit | Supported by synteny | Confirmed by Treefam |
| WBGene00020868 | <i>eif-1</i>     | CBG02293 | 2 | 0           | Possible alternative BLAST hit | Supported by synteny | Confirmed by Treefam |
| WBGene00003393 | <i>mog-5</i>     | CBG02387 | 2 | 0           | Possible alternative BLAST hit | Supported by synteny | Confirmed by Treefam |
| WBGene00022781 | <i>pmt-1</i>     | CBG02363 | 2 | 0           | Possible alternative BLAST hit | Supported by synteny | Confirmed by Treefam |
| WBGene00000548 | <i>clr-1</i>     | CBG02405 | 2 | 0           | Possible alternative BLAST hit | Supported by synteny | Confirmed by Treefam |
| WBGene00004267 | <i>rab-3</i>     | CBG02488 | 2 | 0.397940009 | Possible alternative BLAST hit | Supported by synteny | Confirmed by Treefam |
| WBGene00002094 | <i>ins-11</i>    | CBG02440 | 2 | 11          | Possible alternative BLAST hit | Supported by synteny | Confirmed by Treefam |
| WBGene00019608 | <i>ani-2</i>     | CBG02638 | 2 | 0           | Possible alternative BLAST hit | Supported by synteny | Confirmed by Treefam |
| WBGene00001194 | <i>egl-27</i>    | CBG11165 | 2 | 0           | Possible alternative BLAST hit | Supported by synteny | Confirmed by Treefam |
| WBGene00006831 | <i>unc-104</i>   | CBG11201 | 2 | 0           | Possible alternative BLAST hit | Supported by synteny | Confirmed by Treefam |
| WBGene00002238 | <i>kars-1</i>    | CBG24742 | 2 | 0           | Possible alternative BLAST hit | Supported by synteny | Confirmed by Treefam |
| WBGene00002008 | <i>hsp-4</i>     | CBG13144 | 2 | 0           | Possible alternative BLAST hit | Supported by synteny | Confirmed by Treefam |
| WBGene00019940 | <i>npp-21</i>    | CBG13007 | 2 | 0           | Possible alternative BLAST hit | Supported by synteny | Confirmed by Treefam |
| WBGene00014051 | <i>tag-341</i>   | CBG03288 | 2 | 0           | Possible alternative BLAST hit | Supported by synteny | Confirmed by Treefam |
| WBGene00011510 | <i>T05H10.6</i>  | CBG13339 | 2 | 0           | Possible alternative BLAST hit | Supported by synteny | Confirmed by Treefam |

|                |                  |          |   |             |                                |                      |                      |
|----------------|------------------|----------|---|-------------|--------------------------------|----------------------|----------------------|
| WBGene00003730 | <i>nhx-2</i>     | CBG13035 | 2 | 0           | Possible alternative BLAST hit | Supported by synteny | Confirmed by Treefam |
| WBGene00002066 | <i>jfg-1</i>     | CBG00709 | 2 | 0           | Possible alternative BLAST hit | Supported by synteny | Confirmed by Treefam |
| WBGene00003241 | <i>mig-5</i>     | CBG00722 | 2 | 0           | Possible alternative BLAST hit | Supported by synteny | Confirmed by Treefam |
| WBGene00008053 | <i>cdc-48.2</i>  | CBG00746 | 2 | 0           | Possible alternative BLAST hit | Supported by synteny | Confirmed by Treefam |
| WBGene00002065 | <i>iff-2</i>     | CBG00567 | 2 | 2.301029996 | Possible alternative BLAST hit | Supported by synteny | Confirmed by Treefam |
| WBGene00010042 | <i>bcs-1</i>     | CBG00560 | 2 | 0           | Possible alternative BLAST hit | Supported by synteny | Confirmed by Treefam |
| WBGene00003196 | <i>mel-11</i>    | CBG00870 | 2 | 0           | Possible alternative BLAST hit | Supported by synteny | Confirmed by Treefam |
| WBGene00011674 | <i>cyp-13A8</i>  | CBG01028 | 2 | 0           | Possible alternative BLAST hit | Supported by synteny | Confirmed by Treefam |
| WBGene00000796 | <i>crn-3</i>     | CBG03060 | 2 | 0           | Possible alternative BLAST hit | Supported by synteny | Confirmed by Treefam |
| WBGene00007352 | <i>cdc-48.1</i>  | CBG03070 | 2 | 0           | Possible alternative BLAST hit | Supported by synteny | Confirmed by Treefam |
| WBGene00004134 | <i>pqn-47</i>    | CBG03089 | 2 | 0           | Possible alternative BLAST hit | Supported by synteny | Confirmed by Treefam |
| WBGene00002297 | <i>ect-2</i>     | CBG03012 | 2 | 0           | Possible alternative BLAST hit | Supported by synteny | Confirmed by Treefam |
| WBGene00010051 | <i>F54D5.5</i>   | CBG02859 | 2 | 0           | Possible alternative BLAST hit | Supported by synteny | Confirmed by Treefam |
| WBGene00006617 | <i>tars-1</i>    | CBG03144 | 2 | 0           | Possible alternative BLAST hit | Supported by synteny | Confirmed by Treefam |
| WBGene00007028 | <i>trr-1</i>     | CBG02835 | 2 | 0           | Possible alternative BLAST hit | Supported by synteny | Confirmed by Treefam |
| WBGene00012469 | <i>Y17G7B.18</i> | CBG21009 | 2 | 0           | Possible alternative BLAST hit | Supported by synteny | Confirmed by Treefam |
| WBGene00013217 | <i>ddl-3</i>     | CBG11100 | 2 | 0           | Possible alternative BLAST hit | Supported by synteny | Confirmed by Treefam |
| WBGene00002996 | <i>lin-7</i>     | CBG11102 | 2 | 2.301029996 | Possible alternative BLAST hit | Supported by synteny | Confirmed by Treefam |
| WBGene00006787 | <i>unc-52</i>    | CBG11064 | 2 | 0           | Possible alternative BLAST hit | Supported by synteny | Confirmed by Treefam |
| WBGene00018794 | <i>F54C4.3</i>   | CBG00463 | 2 | 0           | Possible alternative BLAST hit | Supported by synteny | Confirmed by Treefam |
| WBGene00019212 | <i>H19M22.3</i>  | CBG09830 | 2 | 0           | Possible alternative BLAST hit | Supported by synteny | Confirmed by Treefam |
| WBGene00002915 | <i>let-805</i>   | CBG09834 | 2 | 0           | Possible alternative BLAST hit | Supported by synteny | Confirmed by Treefam |
| WBGene00004414 | <i>rpl-3</i>     | CBG03612 | 2 | 0           | Possible alternative BLAST hit | Supported by synteny | Confirmed by Treefam |
| WBGene00004765 | <i>sel-8</i>     | CBG09768 | 2 | 0.204119983 | Possible alternative BLAST hit | Supported by synteny | Confirmed by Treefam |
| WBGene00006537 | <i>tbb-2</i>     | CBG20196 | 2 | 0           | Possible alternative BLAST hit | Supported by synteny | Confirmed by Treefam |
| WBGene00007135 | <i>cdtI-7</i>    | CBG18089 | 2 | 0           | Possible alternative BLAST hit | Supported by synteny | Confirmed by Treefam |
| WBGene00003401 | <i>mpk-1</i>     | CBG21247 | 2 | 0           | Possible alternative BLAST hit | Supported by synteny | Confirmed by Treefam |
| WBGene00000380 | <i>cct-5</i>     | CBG18052 | 2 | 0           | Possible alternative BLAST hit | Supported by synteny | Confirmed by Treefam |
| WBGene00003915 | <i>pan-1</i>     | CBG18042 | 2 | 0           | Possible alternative BLAST hit | Supported by synteny | Confirmed by Treefam |
| WBGene00011409 | <i>T04A8.7</i>   | CBG18010 | 2 | 0           | Possible alternative BLAST hit | Supported by synteny | Confirmed by Treefam |
| WBGene00016140 | <i>rpb-2</i>     | CBG18197 | 2 | 0           | Possible alternative BLAST hit | Supported by synteny | Confirmed by Treefam |
| WBGene00004679 | <i>rars-1</i>    | CBG18188 | 2 | 0           | Possible alternative BLAST hit | Supported by synteny | Confirmed by Treefam |
| WBGene00020097 | <i>larp-1</i>    | CBG16526 | 2 | 0           | Possible alternative BLAST hit | Supported by synteny | Confirmed by Treefam |
| WBGene00001744 | <i>gars-1</i>    | CBG21320 | 2 | 0           | Possible alternative BLAST hit | Supported by synteny | Confirmed by Treefam |
| WBGene00018967 | <i>F56D2.6</i>   | CBG08977 | 2 | 0           | Possible alternative BLAST hit | Supported by synteny | Confirmed by Treefam |
| WBGene00017300 | <i>F09F7.3</i>   | CBG24045 | 2 | 0           | Possible alternative BLAST hit | Supported by synteny | Confirmed by Treefam |
| WBGene00006590 | <i>toc-1</i>     | CBG21191 | 2 | 0           | Possible alternative BLAST hit | Supported by synteny | Confirmed by Treefam |
| WBGene00000874 | <i>cyk-3</i>     | CBG09021 | 2 | 0           | Possible alternative BLAST hit | Supported by synteny | Confirmed by Treefam |
| WBGene00007016 | <i>mdt-15</i>    | CBG09077 | 2 | 0           | Possible alternative BLAST hit | Supported by synteny | Confirmed by Treefam |
| WBGene00006727 | <i>ubq-1</i>     | CBG09037 | 2 | 0           | Possible alternative BLAST hit | Supported by synteny | Confirmed by Treefam |
| WBGene00000381 | <i>cct-6</i>     | CBG09073 | 2 | 0           | Possible alternative BLAST hit | Supported by synteny | Confirmed by Treefam |
| WBGene00003918 | <i>par-3</i>     | CBG08987 | 2 | 0           | Possible alternative BLAST hit | Supported by synteny | Confirmed by Treefam |
| WBGene00021534 | <i>mvk-1</i>     | CBG21109 | 2 | 0           | Possible alternative BLAST hit | Supported by synteny | Confirmed by Treefam |
| WBGene00002201 | <i>kin-18</i>    | CBG21107 | 2 | 0           | Possible alternative BLAST hit | Supported by synteny | Confirmed by Treefam |
| WBGene00003796 | <i>npp-10</i>    | CBG09022 | 2 | 0           | Possible alternative BLAST hit | Supported by synteny | Confirmed by Treefam |
| WBGene00001166 | <i>eftu-2</i>    | CBG09023 | 2 | 0           | Possible alternative BLAST hit | Supported by synteny | Confirmed by Treefam |
| WBGene00017166 | <i>aldo-2</i>    | CBG09060 | 2 | 0           | Possible alternative BLAST hit | Supported by synteny | Confirmed by Treefam |
| WBGene00016977 | <i>C56G2.1</i>   | CBG09108 | 2 | 0           | Possible alternative BLAST hit | Supported by synteny | Confirmed by Treefam |
| WBGene00002891 | <i>let-767</i>   | CBG19695 | 2 | 0           | Possible alternative BLAST hit | Supported by synteny | Confirmed by Treefam |
| WBGene00004459 | <i>rpn-2</i>     | CBG24264 | 2 | 0           | Possible alternative BLAST hit | Supported by synteny | Confirmed by Treefam |
| WBGene00006463 | <i>nduf-2.2</i>  | CBG19683 | 2 | 0           | Possible alternative BLAST hit | Supported by synteny | Confirmed by Treefam |
| WBGene00003214 | <i>mel-32</i>    | CBG19673 | 2 | 0           | Possible alternative BLAST hit | Supported by synteny | Confirmed by Treefam |
| WBGene00004503 | <i>rpt-3</i>     | CBG09101 | 2 | 0           | Possible alternative BLAST hit | Supported by synteny | Confirmed by Treefam |
| WBGene00004462 | <i>rpn-6.1</i>   | CBG16487 | 2 | 0           | Possible alternative BLAST hit | Supported by synteny | Confirmed by Treefam |
| WBGene00003819 | <i>let-765</i>   | CBG15212 | 2 | 0           | Possible alternative BLAST hit | Supported by synteny | Confirmed by Treefam |
| WBGene00000872 | <i>cyk-1</i>     | CBG16504 | 2 | 0           | Possible alternative BLAST hit | Supported by synteny | Confirmed by Treefam |
| WBGene00015159 | <i>psd-1</i>     | CBG24141 | 2 | 0           | Possible alternative BLAST hit | Supported by synteny | Confirmed by Treefam |
| WBGene00001503 | <i>fum-1</i>     | CBG09180 | 2 | 0           | Possible alternative BLAST hit | Supported by synteny | Confirmed by Treefam |
| WBGene00004189 | <i>pars-1</i>    | CBG24153 | 2 | 0           | Possible alternative BLAST hit | Supported by synteny | Confirmed by Treefam |
| WBGene00015579 | <i>C07H6.2</i>   | CBG09169 | 2 | 14.04575749 | Possible alternative BLAST hit | Supported by synteny | Confirmed by Treefam |

|                |                  |          |   |             |                                |                      |                      |
|----------------|------------------|----------|---|-------------|--------------------------------|----------------------|----------------------|
| WBGene00003497 | <i>mup-4</i>     | CBG09178 | 2 | 0           | Possible alternative BLAST hit | Supported by synteny | Confirmed by Treefam |
| WBGene00000041 | <i>aco-2</i>     | CBG22943 | 2 | 0           | Possible alternative BLAST hit | Supported by synteny | Confirmed by Treefam |
| WBGene00006818 | <i>unc-86</i>    | CBG16662 | 2 | 0           | Possible alternative BLAST hit | Supported by synteny | Confirmed by Treefam |
| WBGene00004042 | <i>plk-1</i>     | CBG09233 | 2 | 0           | Possible alternative BLAST hit | Supported by synteny | Confirmed by Treefam |
| WBGene00007008 | <i>rfp-1</i>     | CBG18162 | 2 | 0           | Possible alternative BLAST hit | Supported by synteny | Confirmed by Treefam |
| WBGene00001028 | <i>dnj-10</i>    | CBG22923 | 2 | 0           | Possible alternative BLAST hit | Supported by synteny | Confirmed by Treefam |
| WBGene00002998 | <i>lin-9</i>     | CBG06880 | 2 | 0           | Possible alternative BLAST hit | Supported by synteny | Confirmed by Treefam |
| WBGene00001609 | <i>glp-1</i>     | CBG06809 | 2 | 0           | Possible alternative BLAST hit | Supported by synteny | Confirmed by Treefam |
| WBGene00006768 | <i>unc-32</i>    | CBG06881 | 2 | 0           | Possible alternative BLAST hit | Supported by synteny | Confirmed by Treefam |
| WBGene00006579 | <i>tlk-1</i>     | CBG10016 | 2 | 0           | Possible alternative BLAST hit | Supported by synteny | Confirmed by Treefam |
| WBGene00001263 | <i>emb-9</i>     | CBG10116 | 2 | 0           | Possible alternative BLAST hit | Supported by synteny | Confirmed by Treefam |
| WBGene00003389 | <i>mag-1</i>     | CBG09937 | 2 | 0           | Possible alternative BLAST hit | Supported by synteny | Confirmed by Treefam |
| WBGene00002064 | <i>jff-1</i>     | CBG10008 | 2 | 0.079181246 | Possible alternative BLAST hit | Supported by synteny | Confirmed by Treefam |
| WBGene00003158 | <i>mcm-6</i>     | CBG09994 | 2 | 0           | Possible alternative BLAST hit | Supported by synteny | Confirmed by Treefam |
| WBGene00003482 | <i>mua-3</i>     | CBG09798 | 2 | 0           | Possible alternative BLAST hit | Supported by synteny | Confirmed by Treefam |
| WBGene00000366 | <i>cbp-1</i>     | CBG09974 | 2 | 0           | Possible alternative BLAST hit | Supported by synteny | Confirmed by Treefam |
| WBGene00009654 | <i>F43D9.3</i>   | CBG18370 | 2 | 0           | Possible alternative BLAST hit | Supported by synteny | Confirmed by Treefam |
| WBGene00000836 | <i>cul-1</i>     | CBG18382 | 2 | 0           | Possible alternative BLAST hit | Supported by synteny | Confirmed by Treefam |
| WBGene00006395 | <i>taf-11.3</i>  | CBG18373 | 2 | 15.84509804 | Possible alternative BLAST hit | Supported by synteny | Confirmed by Treefam |
| WBGene00012972 | <i>rsa-2</i>     | CBG13166 | 2 | 0           | Possible alternative BLAST hit | Supported by synteny | Confirmed by Treefam |
| WBGene00004873 | <i>smc-3</i>     | CBG13206 | 2 | 0           | Possible alternative BLAST hit | Supported by synteny | Confirmed by Treefam |
| WBGene00012936 | <i>Y47D3A.29</i> | CBG13184 | 2 | 0           | Possible alternative BLAST hit | Supported by synteny | Confirmed by Treefam |
| WBGene00010923 | <i>rle-1</i>     | CBG18273 | 2 | 0           | Possible alternative BLAST hit | Supported by synteny | Confirmed by Treefam |
| WBGene00004736 | <i>sca-1</i>     | CBG18305 | 2 | 0           | Possible alternative BLAST hit | Supported by synteny | Confirmed by Treefam |
| WBGene00006536 | <i>tbb-1</i>     | CBG18319 | 2 | 0           | Possible alternative BLAST hit | Supported by synteny | Confirmed by Treefam |
| WBGene00004506 | <i>rpt-6</i>     | CBG11771 | 2 | 0           | Possible alternative BLAST hit | Supported by synteny | Confirmed by Treefam |
| WBGene00006439 | <i>ant-1.1</i>   | CBG21201 | 2 | 0           | Possible alternative BLAST hit | Supported by synteny | Confirmed by Treefam |
| WBGene00003048 | <i>lit-1</i>     | CBG18286 | 2 | 0           | Possible alternative BLAST hit | Supported by synteny | Confirmed by Treefam |
| WBGene00010665 | <i>K08E3.5</i>   | CBG18265 | 2 | 0           | Possible alternative BLAST hit | Supported by synteny | Confirmed by Treefam |
| WBGene00022164 | <i>Y71H2AL.1</i> | CBG09836 | 2 | 0           | Possible alternative BLAST hit | Supported by synteny | Confirmed by Treefam |
| WBGene00000160 | <i>apb-1</i>     | CBG09822 | 2 | 0           | Possible alternative BLAST hit | Supported by synteny | Confirmed by Treefam |
| WBGene00022048 | <i>fln-1</i>     | CBG10541 | 2 | 0           | Possible alternative BLAST hit | Supported by synteny | Confirmed by Treefam |
| WBGene00022049 | <i>fln-1</i>     | CBG10542 | 2 | 0           | Possible alternative BLAST hit | Supported by synteny | Confirmed by Treefam |
| WBGene00017926 | <i>F29C4.2</i>   | CBG01648 | 2 | 16.52287875 | Possible alternative BLAST hit | Supported by synteny | Confirmed by Treefam |
| WBGene00001999 | <i>hrp-1</i>     | CBG05352 | 2 | 0           | Possible alternative BLAST hit | Supported by synteny | Confirmed by Treefam |
| WBGene00017121 | <i>cyc-2.1</i>   | CBG01744 | 2 | 11.30103    | Possible alternative BLAST hit | Supported by synteny | Confirmed by Treefam |
| WBGene00019953 | <i>wapl-1</i>    | CBG01692 | 2 | 0           | Possible alternative BLAST hit | Supported by synteny | Confirmed by Treefam |
| WBGene00020679 | <i>T22B11.5</i>  | CBG01737 | 2 | 0           | Possible alternative BLAST hit | Supported by synteny | Confirmed by Treefam |
| WBGene00001093 | <i>drp-1</i>     | CBG19923 | 2 | 0           | Possible alternative BLAST hit | Supported by synteny | Confirmed by Treefam |
| WBGene00006974 | <i>zen-4</i>     | CBG05519 | 2 | 0           | Possible alternative BLAST hit | Supported by synteny | Confirmed by Treefam |
| WBGene00002245 | <i>lag-1</i>     | CBG05522 | 2 | 0           | Possible alternative BLAST hit | Supported by synteny | Confirmed by Treefam |
| WBGene00001241 | <i>elo-3</i>     | CBG05815 | 2 | 0           | Possible alternative BLAST hit | Supported by synteny | Confirmed by Treefam |
| WBGene00001187 | <i>egl-19</i>    | CBG05858 | 2 | 0           | Possible alternative BLAST hit | Supported by synteny | Confirmed by Treefam |
| WBGene00003914 | <i>pam-1</i>     | CBG05905 | 2 | 0           | Possible alternative BLAST hit | Supported by synteny | Confirmed by Treefam |
| WBGene00017641 | <i>csr-1</i>     | CBG17720 | 2 | 0           | Possible alternative BLAST hit | Supported by synteny | Confirmed by Treefam |
| WBGene00000994 | <i>dic-1</i>     | CBG19655 | 2 | 0           | Possible alternative BLAST hit | Supported by synteny | Confirmed by Treefam |
| WBGene00002046 | <i>icl-1</i>     | CBG21766 | 2 | 11.75696195 | Possible alternative BLAST hit | Supported by synteny | Confirmed by Treefam |
| WBGene00003787 | <i>npp-1</i>     | CBG03470 | 2 | 0           | Possible alternative BLAST hit | Supported by synteny | Confirmed by Treefam |
| WBGene00006699 | <i>uba-1</i>     | CBG03440 | 2 | 0           | Possible alternative BLAST hit | Supported by synteny | Confirmed by Treefam |
| WBGene00001249 | <i>elt-1</i>     | CBG20056 | 2 | 0.698970004 | Possible alternative BLAST hit | Supported by synteny | Confirmed by Treefam |
| WBGene00008149 | <i>pyp-1</i>     | CBG03439 | 2 | 0           | Possible alternative BLAST hit | Supported by synteny | Confirmed by Treefam |
| WBGene00011775 | <i>T14G10.5</i>  | CBG03408 | 2 | 0           | Possible alternative BLAST hit | Supported by synteny | Confirmed by Treefam |
| WBGene00004297 | <i>rad-51</i>    | CBG04405 | 2 | 0           | Possible alternative BLAST hit | Supported by synteny | Confirmed by Treefam |
| WBGene00001328 | <i>epi-1</i>     | CBG04423 | 2 | 0           | Possible alternative BLAST hit | Supported by synteny | Confirmed by Treefam |
| WBGene00002001 | <i>hars-1</i>    | CBG17616 | 2 | 0           | Possible alternative BLAST hit | Supported by synteny | Confirmed by Treefam |
| WBGene00011480 | <i>T05E11.3</i>  | CBG06014 | 2 | 0           | Possible alternative BLAST hit | Supported by synteny | Confirmed by Treefam |
| WBGene00006490 | <i>tag-144</i>   | CBG05992 | 2 | 0           | Possible alternative BLAST hit | Supported by synteny | Confirmed by Treefam |
| WBGene00008505 | <i>F01G4.6</i>   | CBG06020 | 2 | 0           | Possible alternative BLAST hit | Supported by synteny | Confirmed by Treefam |
| WBGene00001017 | <i>dnc-1</i>     | CBG05960 | 2 | 0           | Possible alternative BLAST hit | Supported by synteny | Confirmed by Treefam |
| WBGene00007444 | <i>C08F8.2</i>   | CBG06022 | 2 | 0           | Possible alternative BLAST hit | Supported by synteny | Confirmed by Treefam |

|                |                 |          |   |             |                                |                      |                      |
|----------------|-----------------|----------|---|-------------|--------------------------------|----------------------|----------------------|
| WBGene00003415 | <i>mars-1</i>   | CBG06108 | 2 | 0           | Possible alternative BLAST hit | Supported by synteny | Confirmed by Treefam |
| WBGene00014087 | <i>ZK809.5</i>  | CBG06100 | 2 | 0           | Possible alternative BLAST hit | Supported by synteny | Confirmed by Treefam |
| WBGene00002827 | <i>let-653</i>  | CBG06185 | 2 | 0           | Possible alternative BLAST hit | Supported by synteny | Confirmed by Treefam |
| WBGene00006759 | <i>unc-22</i>   | CBG06205 | 2 | 0           | Possible alternative BLAST hit | Supported by synteny | Confirmed by Treefam |
| WBGene00006733 | <i>ufd-1</i>    | CBG03313 | 2 | 0           | Possible alternative BLAST hit | Supported by synteny | Confirmed by Treefam |
| WBGene00003037 | <i>lin-54</i>   | CBG01805 | 2 | 0           | Possible alternative BLAST hit | Supported by synteny | Confirmed by Treefam |
| WBGene00004410 | <i>rla-2</i>    | CBG01783 | 2 | 0           | Possible alternative BLAST hit | Supported by synteny | Confirmed by Treefam |
| WBGene00001007 | <i>dli-1</i>    | CBG01826 | 2 | 0           | Possible alternative BLAST hit | Supported by synteny | Confirmed by Treefam |
| WBGene00012769 | <i>Y41E3.11</i> | CBG23721 | 2 | 0           | Possible alternative BLAST hit | Supported by synteny | Confirmed by Treefam |
| WBGene00002005 | <i>hsp-1</i>    | CBG00457 | 2 | 0           | Possible alternative BLAST hit | Supported by synteny | Confirmed by Treefam |
| WBGene00001177 | <i>egl-8</i>    | CBG06373 | 2 | 0           | Possible alternative BLAST hit | Supported by synteny | Confirmed by Treefam |
| WBGene00020391 | <i>cct-7</i>    | CBG21817 | 2 | 0           | Possible alternative BLAST hit | Supported by synteny | Confirmed by Treefam |
| WBGene00021562 | <i>nuo-5</i>    | CBG06645 | 2 | 0           | Possible alternative BLAST hit | Supported by synteny | Confirmed by Treefam |
| WBGene00004422 | <i>rpl-11.1</i> | CBG01314 | 2 | 8           | Possible alternative BLAST hit | Supported by synteny | Confirmed by Treefam |
| WBGene00019275 | <i>H43I07.2</i> | CBG01436 | 2 | 0           | Possible alternative BLAST hit | Supported by synteny | Confirmed by Treefam |
| WBGene00002010 | <i>hsp-6</i>    | CBG08827 | 2 | 0           | Possible alternative BLAST hit | Supported by synteny | Confirmed by Treefam |
| WBGene00006392 | <i>taf-10</i>   | CBG08794 | 2 | 2.15490196  | Possible alternative BLAST hit | Supported by synteny | Confirmed by Treefam |
| WBGene00016509 | <i>C37H5.6</i>  | CBG08829 | 2 | 0           | Possible alternative BLAST hit | Supported by synteny | Confirmed by Treefam |
| WBGene00019762 | <i>M03F8.3</i>  | CBG09283 | 2 | 0           | Possible alternative BLAST hit | Supported by synteny | Confirmed by Treefam |
| WBGene00002148 | <i>gon-14</i>   | CBG18977 | 2 | 0           | Possible alternative BLAST hit | Supported by synteny | Confirmed by Treefam |
| WBGene00018488 | <i>acs-1</i>    | CBG18959 | 2 | 0           | Possible alternative BLAST hit | Supported by synteny | Confirmed by Treefam |
| WBGene00006803 | <i>unc-70</i>   | CBG19038 | 2 | 0           | Possible alternative BLAST hit | Supported by synteny | Confirmed by Treefam |
| WBGene00016498 | <i>mig-6</i>    | CBG20566 | 2 | 0           | Possible alternative BLAST hit | Supported by synteny | Confirmed by Treefam |
| WBGene00016496 | <i>C37C3.2</i>  | CBG20562 | 2 | 0           | Possible alternative BLAST hit | Supported by synteny | Confirmed by Treefam |
| WBGene00002632 | <i>let-413</i>  | CBG08615 | 2 | 0           | Possible alternative BLAST hit | Supported by synteny | Confirmed by Treefam |
| WBGene00006760 | <i>unc-23</i>   | CBG19136 | 2 | 0           | Possible alternative BLAST hit | Supported by synteny | Confirmed by Treefam |
| WBGene00015274 | <i>ztf-12</i>   | CBG00762 | 2 | 0           | Possible alternative BLAST hit | Supported by synteny | Confirmed by Treefam |
| WBGene00008239 | <i>fshr-1</i>   | CBG19394 | 2 | 0           | Possible alternative BLAST hit | Supported by synteny | Confirmed by Treefam |
| WBGene00012528 | <i>pap-1</i>    | CBG09607 | 2 | 0           | Possible alternative BLAST hit | Supported by synteny | Confirmed by Treefam |
| WBGene00001747 | <i>gsp-1</i>    | CBG09676 | 2 | 0           | Possible alternative BLAST hit | Supported by synteny | Confirmed by Treefam |
| WBGene00006481 | <i>tag-135</i>  | CBG09714 | 2 | 0           | Possible alternative BLAST hit | Supported by synteny | Confirmed by Treefam |
| WBGene00008920 | <i>eef-1G</i>   | CBG23066 | 2 | 0           | Possible alternative BLAST hit | Supported by synteny | Confirmed by Treefam |
| WBGene00007586 | <i>ril-2</i>    | CBG23539 | 2 | 0           | Possible alternative BLAST hit | Supported by synteny | Confirmed by Treefam |
| WBGene00003916 | <i>par-1</i>    | CBG04756 | 2 | 0           | Possible alternative BLAST hit | Supported by synteny | Confirmed by Treefam |
| WBGene00001834 | <i>hda-1</i>    | CBG04588 | 2 | 0           | Possible alternative BLAST hit | Supported by synteny | Confirmed by Treefam |
| WBGene00000868 | <i>cyb-3</i>    | CBG05553 | 2 | 0           | Possible alternative BLAST hit | Supported by synteny | Confirmed by Treefam |
| WBGene00013075 | <i>Y51A2D.7</i> | CBG12925 | 2 | 0           | Possible alternative BLAST hit | Supported by synteny | Confirmed by Treefam |
| WBGene00000498 | <i>chk-1</i>    | CBG06670 | 2 | 0           | Possible alternative BLAST hit | Supported by synteny | Confirmed by Treefam |
| WBGene00002150 | <i>irk-2</i>    | CBG08126 | 2 | 0           | Possible alternative BLAST hit | Supported by synteny | Confirmed by Treefam |
| WBGene00020507 | <i>vha-15</i>   | CBG14055 | 2 | 0           | Possible alternative BLAST hit | Supported by synteny | Confirmed by Treefam |
| WBGene00004423 | <i>rpl-11.2</i> | CBG14053 | 2 | 10.82390874 | Possible alternative BLAST hit | Supported by synteny | Confirmed by Treefam |
| WBGene00003776 | <i>nmy-1</i>    | CBG02025 | 2 | 0           | Possible alternative BLAST hit | Supported by synteny | Confirmed by Treefam |
| WBGene00006810 | <i>unc-78</i>   | CBG14204 | 2 | 0           | Possible alternative BLAST hit | Supported by synteny | Confirmed by Treefam |
| WBGene00004729 | <i>sax-3</i>    | CBG14221 | 2 | 0           | Possible alternative BLAST hit | Supported by synteny | Confirmed by Treefam |
| WBGene00018533 | <i>F47B7.2</i>  | CBG14281 | 2 | 0           | Possible alternative BLAST hit | Supported by synteny | Confirmed by Treefam |
| WBGene00003963 | <i>pdi-2</i>    | CBG14484 | 2 | 0           | Possible alternative BLAST hit | Supported by synteny | Confirmed by Treefam |
| WBGene00006921 | <i>vha-12</i>   | CBG14362 | 2 | 0           | Possible alternative BLAST hit | Supported by synteny | Confirmed by Treefam |
| WBGene00003412 | <i>mrp-6</i>    | CBG14361 | 2 | 0           | Possible alternative BLAST hit | Supported by synteny | Confirmed by Treefam |
| WBGene00001082 | <i>dpy-23</i>   | CBG14461 | 2 | 0           | Possible alternative BLAST hit | Supported by synteny | Confirmed by Treefam |
| WBGene00000149 | <i>apl-1</i>    | CBG14611 | 2 | 0           | Possible alternative BLAST hit | Supported by synteny | Confirmed by Treefam |
| WBGene00020734 | <i>bus-8</i>    | CBG14694 | 2 | 0           | Possible alternative BLAST hit | Supported by synteny | Confirmed by Treefam |
| WBGene00002190 | <i>kin-2</i>    | CBG14791 | 2 | 0           | Possible alternative BLAST hit | Supported by synteny | Confirmed by Treefam |
| WBGene00002007 | <i>hsp-3</i>    | CBG14829 | 2 | 0           | Possible alternative BLAST hit | Supported by synteny | Confirmed by Treefam |
| WBGene00003877 | <i>pept-1</i>   | CBG05068 | 2 | 0           | Possible alternative BLAST hit | Supported by synteny | Confirmed by Treefam |
| WBGene00003530 | <i>nas-11</i>   | CBG10873 | 2 | 0           | Possible alternative BLAST hit | Supported by synteny | Confirmed by Treefam |
| WBGene00000210 | <i>asg-2</i>    | CBG10906 | 2 | 11.47712125 | Possible alternative BLAST hit | Supported by synteny | Confirmed by Treefam |
| WBGene00000083 | <i>adt-2</i>    | CBG16735 | 2 | 0           | Possible alternative BLAST hit | Supported by synteny | Confirmed by Treefam |
| WBGene00015391 | <i>sdha-1</i>   | CBG22795 | 2 | 0           | Possible alternative BLAST hit | Supported by synteny | Confirmed by Treefam |
| WBGene00016006 | <i>fln-2</i>    | CBG16142 | 2 | 0           | Possible alternative BLAST hit | Supported by synteny | Confirmed by Treefam |
| WBGene00003232 | <i>mgl-1</i>    | CBG01949 | 2 | 0           | Possible alternative BLAST hit | Supported by synteny | Confirmed by Treefam |

|                |                  |          |   |             |                                |                          |                          |
|----------------|------------------|----------|---|-------------|--------------------------------|--------------------------|--------------------------|
| WBGene00003553 | <i>nas-37</i>    | CBG01954 | 2 | 0           | Possible alternative BLAST hit | Supported by synteny     | Confirmed by Treefam     |
| WBGene00009617 | <i>F41E7.1</i>   | CBG17199 | 2 | 0           | Possible alternative BLAST hit | Supported by synteny     | Confirmed by Treefam     |
| WBGene00004036 | <i>plc-1</i>     | CBG17587 | 2 | 0           | Possible alternative BLAST hit | Supported by synteny     | Confirmed by Treefam     |
| WBGene00004888 | <i>smo-1</i>     | CBG22301 | 2 | 0           | Possible alternative BLAST hit | Supported by synteny     | Confirmed by Treefam     |
| WBGene00000466 | <i>cel-1</i>     | CBG03700 | 2 | 0           | Possible alternative BLAST hit | Supported by synteny     | Confirmed by Treefam     |
| WBGene00000410 | <i>cdk-9</i>     | CBG20416 | 2 | 0           | Possible alternative BLAST hit | Supported by synteny     | Confirmed by Treefam     |
| WBGene00022743 | <i>mlt-7</i>     | CBG03680 | 2 | 0           | Possible alternative BLAST hit | Supported by synteny     | Confirmed by Treefam     |
| WBGene00016115 | <i>mdt-26</i>    | CBG02470 | 2 | 0           | Possible alternative BLAST hit | Supported by synteny     | Confirmed by Treefam     |
| WBGene00015512 | <i>C06A8.1</i>   | CBG12960 | 2 | 0           | Possible alternative BLAST hit | Supported by synteny     | Confirmed by Treefam     |
| WBGene00001358 | <i>evl-20</i>    | CBG24969 | 2 | 0           | Possible alternative BLAST hit | Supported by synteny     | Confirmed by Treefam     |
| WBGene00018239 | <i>sec-20</i>    | CBG15723 | 2 | 0           | Possible alternative BLAST hit | Supported by synteny     | Confirmed by Treefam     |
| WBGene00003001 | <i>lin-12</i>    | CBG06826 | 2 | 0           | Possible alternative BLAST hit | Supported by synteny     | Confirmed by Treefam     |
| WBGene00001155 | <i>ech-6</i>     | CBG10003 | 2 | 0           | Possible alternative BLAST hit | Supported by synteny     | Confirmed by Treefam     |
| WBGene00013236 | <i>Y5GA3A.18</i> | CBG13319 | 2 | 0           | Possible alternative BLAST hit | Supported by synteny     | Confirmed by Treefam     |
| WBGene00016384 | <i>C33H5.18</i>  | CBG17684 | 2 | 0           | Possible alternative BLAST hit | Supported by synteny     | Confirmed by Treefam     |
| WBGene00010047 | <i>F54D1.6</i>   | CBG06054 | 2 | 0           | Possible alternative BLAST hit | Supported by synteny     | Confirmed by Treefam     |
| WBGene00015461 | <i>C05C8.2</i>   | CBG19114 | 2 | 0           | Possible alternative BLAST hit | Supported by synteny     | Confirmed by Treefam     |
| WBGene00000098 | <i>air-1</i>     | CBG24785 | 2 | 0           | Possible alternative BLAST hit | Supported by synteny     | Confirmed by Treefam     |
| WBGene00000064 | <i>act-2</i>     | CBG23091 | 2 | 0           | Possible alternative BLAST hit | Supported by synteny     | Confirmed by Treefam     |
| WBGene00001184 | <i>egl-15</i>    | CBG17516 | 2 | 0           | Possible alternative BLAST hit | Supported by synteny     | Confirmed by Treefam     |
| WBGene00003003 | <i>lin-14</i>    | CBG17326 | 2 | 0           | Possible alternative BLAST hit | Supported by synteny     | Confirmed by Treefam     |
| WBGene00008205 | <i>sams-1</i>    | CBG15526 | 2 | 0           | Possible alternative BLAST hit | Supported by synteny     | Confirmed by Treefam     |
| WBGene00011938 | <i>alh-13</i>    | CBG00074 | 2 | 0           | Possible alternative BLAST hit | Supported by synteny     | Confirmed by Treefam     |
| WBGene00003623 | <i>nhr-25</i>    | CBG16911 | 2 | 0           | Possible alternative BLAST hit | Supported by synteny     | Confirmed by Treefam     |
| WBGene00000105 | <i>alg-1</i>     | CBG07340 | 2 | 0           | Possible alternative BLAST hit | Supported by synteny     | Confirmed by Treefam     |
| WBGene00003411 | <i>mrp-5</i>     | CBG07659 | 2 | 0           | Possible alternative BLAST hit | Supported by synteny     | Confirmed by Treefam     |
| WBGene00008605 | <i>mlt-9</i>     | CBG07630 | 2 | 0           | Possible alternative BLAST hit | Supported by synteny     | Confirmed by Treefam     |
| WBGene00001520 | <i>gas-1</i>     | CBG07730 | 2 | 0           | Possible alternative BLAST hit | Supported by synteny     | Confirmed by Treefam     |
| WBGene00007463 | <i>C08H9.2</i>   | CBG00996 | 2 | 0           | Possible alternative BLAST hit | Supported by synteny     | Confirmed by Treefam     |
| WBGene00012186 | <i>mlt-11</i>    | CBG05636 | 2 | 0           | Possible alternative BLAST hit | Supported by synteny     | Confirmed by Treefam     |
| WBGene00004181 | <i>pri-2</i>     | CBG08720 | 2 | 0           | Possible alternative BLAST hit | Supported by synteny     | Confirmed by Treefam     |
| WBGene00003795 | <i>npp-9</i>     | CBG09863 | 2 | 0           | Possible alternative BLAST hit | Supported by synteny     | Confirmed by Treefam     |
| WBGene00044072 | <i>tag-246</i>   | CBG09873 | 2 | 0           | Possible alternative BLAST hit | Supported by synteny     | Confirmed by Treefam     |
| WBGene00004027 | <i>pie-1</i>     | CBG11755 | 2 | 14.87506126 | Possible alternative BLAST hit | Supported by synteny     | Confirmed by Treefam     |
| WBGene00000938 | <i>dcp-66</i>    | CBG11888 | 2 | 0           | Possible alternative BLAST hit | Supported by synteny     | Confirmed by Treefam     |
| WBGene00000800 | <i>cars-1</i>    | CBG04128 | 1 | 0           | Possible alternative BLAST hit | Supported by synteny     | Confirmed by Treefam     |
| WBGene00016907 | <i>C53H9.2</i>   | CBG22213 | 1 | 0           | Possible alternative BLAST hit | Not supported by synteny | Confirmed by Treefam     |
| WBGene00006805 | <i>unc-73</i>    | CBG12078 | 1 | 0           | Possible alternative BLAST hit | Not supported by synteny | Confirmed by Treefam     |
| WBGene00000962 | <i>dhc-1</i>     | CBG12193 | 1 | 0           | Possible alternative BLAST hit | Not supported by synteny | Confirmed by Treefam     |
| WBGene00019001 | <i>F57B10.3</i>  | CBG12654 | 1 | 0           | Possible alternative BLAST hit | Not supported by synteny | Confirmed by Treefam     |
| WBGene00001214 | <i>ego-1</i>     | CBG00321 | 1 | 0           | Possible alternative BLAST hit | Not supported by synteny | Confirmed by Treefam     |
| WBGene00003071 | <i>lrp-1</i>     | CBG11882 | 1 | 0           | Possible alternative BLAST hit | Not supported by synteny | Confirmed by Treefam     |
| WBGene00009188 | <i>lsy-22</i>    | CBG00300 | 1 | 2.301029996 | Possible alternative BLAST hit | Supported by synteny     | Not confirmed by Treefam |
| WBGene00004378 | <i>rme-8</i>     | CBG11852 | 1 | 0           | Possible alternative BLAST hit | Supported by synteny     | Not confirmed by Treefam |
| WBGene00009743 | <i>sptf-1</i>    | CBG21350 | 1 | 0.124938737 | Possible alternative BLAST hit | Supported by synteny     | Not confirmed by Treefam |
| WBGene00009371 | <i>F33H2.8</i>   | CBG19733 | 1 | 1           | Possible alternative BLAST hit | Supported by synteny     | Not confirmed by Treefam |
| WBGene00004775 | <i>sep-1</i>     | CBG14956 | 1 | 0           | Possible alternative BLAST hit | Supported by synteny     | Not confirmed by Treefam |
| WBGene00016074 | <i>C24H12.5</i>  | CBG07061 | 1 | 0           | Possible alternative BLAST hit | Not supported by synteny | Confirmed by Treefam     |
| WBGene00004076 | <i>pod-2</i>     | CBG07699 | 1 | 0           | Possible alternative BLAST hit | Not supported by synteny | Confirmed by Treefam     |
| WBGene00017369 | <i>F10G7.5</i>   | CBG13412 | 1 | 0           | Possible alternative BLAST hit | Not supported by synteny | Confirmed by Treefam     |
| WBGene00019888 | <i>R05F9.1</i>   | CBG02271 | 1 | 0           | Possible alternative BLAST hit | Not supported by synteny | Confirmed by Treefam     |
| WBGene00006923 | <i>vhp-1</i>     | CBG02372 | 1 | 0           | Possible alternative BLAST hit | Not supported by synteny | Confirmed by Treefam     |
| WBGene00002053 | <i>jfb-1</i>     | CBG02495 | 1 | 0           | Possible alternative BLAST hit | Not supported by synteny | Confirmed by Treefam     |
| WBGene00001072 | <i>dpy-10</i>    | CBG11227 | 1 | 10.30103    | Possible alternative BLAST hit | Supported by synteny     | Not confirmed by Treefam |
| WBGene00022855 | <i>tcer-1</i>    | CBG11210 | 1 | 0           | Possible alternative BLAST hit | Supported by synteny     | Not confirmed by Treefam |
| WBGene00000894 | <i>dab-1</i>     | CBG00708 | 1 | 0           | Possible alternative BLAST hit | Not supported by synteny | Confirmed by Treefam     |
| WBGene00000289 | <i>cam-1</i>     | CBG20223 | 1 | 0           | Possible alternative BLAST hit | Not supported by synteny | Confirmed by Treefam     |
| WBGene00007332 | <i>C05C10.5</i>  | CBG09062 | 1 | 0.602059991 | Possible alternative BLAST hit | Not supported by synteny | Confirmed by Treefam     |
| WBGene00008546 | <i>F07A11.2</i>  | CBG02850 | 1 | 0           | Possible alternative BLAST hit | Supported by synteny     | Not confirmed by Treefam |
| WBGene00006915 | <i>vha-6</i>     | CBG02894 | 1 | 0           | Possible alternative BLAST hit | Not supported by synteny | Confirmed by Treefam     |

|                |                  |          |   |             |                                |                          |                          |
|----------------|------------------|----------|---|-------------|--------------------------------|--------------------------|--------------------------|
| WBGene00003015 | <i>lin-29</i>    | CBG02753 | 1 | 0           | Possible alternative BLAST hit | Not supported by synteny | Confirmed by Treefam     |
| WBGene00002076 | <i>imb-2</i>     | CBG11089 | 1 | 0           | Possible alternative BLAST hit | Not supported by synteny | Confirmed by Treefam     |
| WBGene00012179 | <i>W01D2.1</i>   | CBG04239 | 1 | 4           | Possible alternative BLAST hit | Supported by synteny     | Not confirmed by Treefam |
| WBGene00012896 | <i>Y46G5A.4</i>  | CBG07909 | 1 | 0           | Possible alternative BLAST hit | Not supported by synteny | Confirmed by Treefam     |
| WBGene00003134 | <i>mat-3</i>     | CBG12598 | 1 | 0           | Possible alternative BLAST hit | Not supported by synteny | Confirmed by Treefam     |
| WBGene00003577 | <i>ndg-4</i>     | CBG18058 | 1 | 0           | Possible alternative BLAST hit | Not supported by synteny | Confirmed by Treefam     |
| WBGene00020093 | <i>R144.3</i>    | CBG16523 | 1 | 1.77815125  | Possible alternative BLAST hit | Supported by synteny     | Not confirmed by Treefam |
| WBGene00016197 | <i>pxl-1</i>     | CBG09041 | 1 | 0           | Possible alternative BLAST hit | Not supported by synteny | Confirmed by Treefam     |
| WBGene00020549 | <i>nmt-1</i>     | CBG21106 | 1 | 0           | Possible alternative BLAST hit | Not supported by synteny | Confirmed by Treefam     |
| WBGene00000549 | <i>cls-2</i>     | CBG09877 | 1 | 0           | Possible alternative BLAST hit | Not supported by synteny | Confirmed by Treefam     |
| WBGene00002219 | <i>klp-7</i>     | CBG18307 | 1 | 0           | Possible alternative BLAST hit | Supported by synteny     | Not confirmed by Treefam |
| WBGene00001077 | <i>dpy-18</i>    | CBG13195 | 1 | 0           | Possible alternative BLAST hit | Not supported by synteny | Confirmed by Treefam     |
| WBGene00004161 | <i>pqn-80</i>    | CBG20130 | 1 | 0           | Possible alternative BLAST hit | Supported by synteny     | Not confirmed by Treefam |
| WBGene00003406 | <i>mrg-1</i>     | CBG15768 | 1 | 3.096910013 | Possible alternative BLAST hit | Not supported by synteny | Confirmed by Treefam     |
| WBGene00000834 | <i>cua-1</i>     | CBG21197 | 1 | 0           | Possible alternative BLAST hit | Not supported by synteny | Confirmed by Treefam     |
| WBGene00020297 | <i>T07A9.9</i>   | CBG13493 | 1 | 0           | Possible alternative BLAST hit | Not supported by synteny | Confirmed by Treefam     |
| WBGene00022310 | <i>Y77E11A.7</i> | CBG13944 | 1 | 0           | Possible alternative BLAST hit | Supported by synteny     | Not confirmed by Treefam |
| WBGene00001983 | <i>hoe-1</i>     | CBG01741 | 1 | 0           | Possible alternative BLAST hit | Not supported by synteny | Confirmed by Treefam     |
| WBGene00001132 | <i>alp-1</i>     | CBG24239 | 1 | 0           | Possible alternative BLAST hit | Not supported by synteny | Confirmed by Treefam     |
| WBGene00001650 | <i>gon-1</i>     | CBG03449 | 1 | 0           | Possible alternative BLAST hit | Not supported by synteny | Confirmed by Treefam     |
| WBGene00001398 | <i>fat-6</i>     | CBG06190 | 1 | 0           | Possible alternative BLAST hit | Supported by synteny     | Not confirmed by Treefam |
| WBGene00003230 | <i>mex-5</i>     | CBG12031 | 1 | 0           | Possible alternative BLAST hit | Supported by synteny     | Not confirmed by Treefam |
| WBGene00001336 | <i>qars-1</i>    | CBG13773 | 1 | 0           | Possible alternative BLAST hit | Not supported by synteny | Confirmed by Treefam     |
| WBGene00001330 | <i>eps-8</i>     | CBG13858 | 1 | 0           | Possible alternative BLAST hit | Not supported by synteny | Confirmed by Treefam     |
| WBGene00021935 | <i>Y55F3BL.1</i> | CBG23913 | 1 | 0           | Possible alternative BLAST hit | Supported by synteny     | Not confirmed by Treefam |
| WBGene00022642 | <i>lip1-5</i>    | CBG01370 | 1 | 0           | Possible alternative BLAST hit | Not supported by synteny | Confirmed by Treefam     |
| WBGene00006796 | <i>unc-62</i>    | CBG24578 | 1 | 0           | Possible alternative BLAST hit | Not supported by synteny | Confirmed by Treefam     |
| WBGene00003515 | <i>myo-3</i>     | CBG23416 | 1 | 0           | Possible alternative BLAST hit | Not supported by synteny | Confirmed by Treefam     |
| WBGene00004013 | <i>pha-4</i>     | CBG05577 | 1 | 0           | Possible alternative BLAST hit | Not supported by synteny | Confirmed by Treefam     |
| WBGene00002056 | <i>ifc-2</i>     | CBG08136 | 1 | 0           | Possible alternative BLAST hit | Not supported by synteny | Confirmed by Treefam     |
| WBGene00001863 | <i>him-4</i>     | CBG16045 | 1 | 0           | Possible alternative BLAST hit | Supported by synteny     | Not confirmed by Treefam |
| WBGene00002261 | <i>ldb-1</i>     | CBG17513 | 1 | 0           | Possible alternative BLAST hit | Not supported by synteny | Confirmed by Treefam     |
| WBGene00002073 | <i>ima-2</i>     | CBG18786 | 1 | 0           | Possible alternative BLAST hit | Not supported by synteny | Confirmed by Treefam     |
| WBGene00001230 | <i>eif-3.G</i>   | CBG24970 | 1 | 0           | Possible alternative BLAST hit | Not supported by synteny | Confirmed by Treefam     |
| WBGene00001561 | <i>gei-4</i>     | CBG15706 | 1 | 0           | Possible alternative BLAST hit | Supported by synteny     | Not confirmed by Treefam |
| WBGene00004340 | <i>rfc-4</i>     | CBG24567 | 1 | 0           | Possible alternative BLAST hit | Not supported by synteny | Confirmed by Treefam     |
| WBGene00012361 | <i>W09D10.3</i>  | CBG18380 | 1 | 0           | Possible alternative BLAST hit | Not supported by synteny | Confirmed by Treefam     |
| WBGene00000067 | <i>act-5</i>     | CBG18256 | 1 | 0           | Possible alternative BLAST hit | Not supported by synteny | Confirmed by Treefam     |
| WBGene00003392 | <i>mog-4</i>     | CBG20862 | 1 | 0           | Possible alternative BLAST hit | Not supported by synteny | Confirmed by Treefam     |
| WBGene00001945 | <i>his-71</i>    | CBG16863 | 1 | 0.096910013 | Possible alternative BLAST hit | Supported by synteny     | Not confirmed by Treefam |
| WBGene00016007 | <i>fln-2</i>     | CBG16145 | 1 | 0           | Possible alternative BLAST hit | Supported by synteny     | Not confirmed by Treefam |
| WBGene00015676 | <i>C10E2.6</i>   | CBG16244 | 1 | 0           | Possible alternative BLAST hit | Not supported by synteny | Confirmed by Treefam     |
| WBGene00006522 | <i>abcx-1</i>    | CBG02686 | 1 | 0           | Possible alternative BLAST hit | Supported by synteny     | Not confirmed by Treefam |
| WBGene00010785 | <i>top-2</i>     | CBG02746 | 1 | 0           | Possible alternative BLAST hit | Supported by synteny     | Not confirmed by Treefam |
| WBGene00006527 | <i>tax-6</i>     | CBG08362 | 1 | 0           | Possible alternative BLAST hit | Not supported by synteny | Confirmed by Treefam     |
| WBGene00001946 | <i>his-72</i>    | CBG11770 | 1 | 0.823908741 | Possible alternative BLAST hit | Supported by synteny     | Not confirmed by Treefam |
| WBGene00000203 | <i>arx-5</i>     | CBG15746 | 1 | 10.69897    | Possible alternative BLAST hit | Not supported by synteny | Confirmed by Treefam     |
| WBGene00002083 | <i>inf-1</i>     | CBG16478 | 1 | 0           | Possible alternative BLAST hit | Supported by synteny     | Not confirmed by Treefam |
| WBGene00012666 | <i>Y39B6A.3</i>  | CBG20529 | 1 | 1.2         | Possible alternative BLAST hit | Not supported by synteny | Confirmed by Treefam     |
| WBGene00000253 | <i>bli-3</i>     | CBG05103 | 0 | 0           | Possible alternative BLAST hit | Not supported by synteny | Not confirmed by Treefam |
| WBGene00002994 | <i>lin-5</i>     | CBG23227 | 0 | 0           | Possible alternative BLAST hit | Not supported by synteny | Not confirmed by Treefam |
| WBGene00006780 | <i>unc-44</i>    | CBG09473 | 0 | 0           | Possible alternative BLAST hit | Not supported by synteny | Not confirmed by Treefam |
| WBGene00002173 | <i>itr-1</i>     | CBG05938 | 0 | 0           | Possible alternative BLAST hit | Not supported by synteny | Not confirmed by Treefam |
| WBGene00019086 | <i>F59A6.4</i>   | CBG20869 | 0 | 0           | Possible alternative BLAST hit | Not supported by synteny | Not confirmed by Treefam |
| WBGene00020279 | <i>glb-25</i>    | CBG24801 | 0 | 0           | Possible alternative BLAST hit | Not supported by synteny | Not confirmed by Treefam |
| WBGene00008266 | <i>C53A5.6</i>   | CBG23781 | 0 | 0.176091259 | Possible alternative BLAST hit | Not supported by synteny | Not confirmed by Treefam |
| WBGene00000066 | <i>act-4</i>     | CBG23090 | 0 | 0           | Possible alternative BLAST hit | Not supported by synteny | Not confirmed by Treefam |
| WBGene00000231 | <i>atx-2</i>     | CBG18377 | 0 | 0           | Possible alternative BLAST hit | Not supported by synteny | Not confirmed by Treefam |
