# Supplementary material for: Comparative RNAi Screens in C. elegans and C. briggsae Reveal the Impact of Developmental System Drift on Gene Function
Source: PubMed Central journal article supplement (PMC3916228; doi:10.1371/journal.pgen.1004077), 2014-02-06
Supplement: pgen.1004077.s008.pdf [file pgen.1004077.s008.pdf]

| Gene(WBID)      | Gene(Common)      | <i>C.elegans</i> phenotype | <i>C.briggsae</i> phenotype | Primary clone (out of 4) | Secondary clone (out of 4) | Functional Class     | Description                                              |
|-----------------|-------------------|----------------------------|-----------------------------|--------------------------|----------------------------|----------------------|----------------------------------------------------------|
| WBGene00000079  | <i>adr-1</i>      | Ste;Lvl                    | Wt                          | 4                        | 2                          | RNA Synthesis        | Adenosine deaminase that acts on RNA (ADAR)              |
| WBGene00000156  | <i>apr-1</i>      | Unc;Bmd;Lvl                | Wt                          | 4                        | 2                          | Signalling           | Orthologue of APC                                        |
| WBGene00000255  | <i>bli-5</i>      | Bli                        | Wt                          | 4                        | 2                          | Proteases            | Kunitz family serine protease inhibitor                  |
| WBGene00000814  | <i>csn-2</i>      | 50-80%_Emb;Gro             | Wt                          | 4                        | 2                          | Degradation          | Subunit of COP9 signalosome complex                      |
| WBGene00001130  | <i>dyn-1</i>      | 100%_Emb;Unc;Mlt;Clr       | Wt                          | 4                        | 2                          | Cell Architecture    | Dynamin GTPase                                           |
| WBGene00001345  | <i>fos-1</i>      | Ste;Rup;Pvl                | Gro                         | 4                        | 2                          | Transcription Factor | Basic region-leucine zipper TF                           |
| WBGene00001979  | <i>hmp-2</i>      | 100%_Emb;Unc;Dpy;Bmd       | Wt                          | 4                        | 2                          | Signalling           | Beta-catenin                                             |
| WBGene00001980  | <i>hmr-1</i>      | 10%_Emb;Unc;Bmd;Dpy        | 10%_Emb                     | 4                        | 2                          | Cell Architecture    | Cadherin                                                 |
| WBGene00003044  | <i>lir-1</i>      | 10%_Emb;Lvl;Unc;Mlt        | Wt                          | 4                        | 2                          | Transcription Factor | LIN-26-like zinc-finger protein                          |
| WBGene00003123  | <i>mag-1</i>      | 90%_Emb;Gro;Dpy            | Gro;Dpy                     | 4                        | 2                          | RNA Synthesis        | EJC member, mago orthologue                              |
| WBGene00003209  | <i>mel-26</i>     | 100%_Emb                   | Wt                          | 4                        | 2                          | Degradation          | Adaptor of CUL-3-containing E3 ubiquitin ligase          |
| WBGene00003210  | <i>mel-28</i>     | 100.00%_Emb                | Gro                         | 4                        | 2                          | Cell Architecture    | Required for nuclear envelope assembly                   |
| WBGene000063651 | <i>nhr-61</i>     | 20-40%_Emb;Gro;Pch;Sma     | Wt                          | 4                        | 2                          | Transcription Factor | Nuclear hormone receptor                                 |
| WBGene00004198  | <i>prx-13</i>     | Gro                        | Wt                          | 4                        | 2                          | Cell Architecture    | Peroxisome assembly factor                               |
| WBGene00004430  | <i>rpl-18</i>     | Ste;Sck                    | Gro                         | 4                        | 2                          | Protein Synthesis    | Ribosomal protein L18                                    |
| WBGene00004450  | <i>rpl-36</i>     | Ste;Sck                    | Red                         | 4                        | 2                          | Protein Synthesis    | Ribosomal protein L36                                    |
| WBGene00004857  | <i>sma-3</i>      | Sma                        | Wt                          | 4                        | 2                          | Cell Architecture    | Beta-H spectrin                                          |
| WBGene00006428  | <i>tag-49</i>     | Ste;Sck                    | Wt                          | 4                        | 2                          | Neuro                | Neuropeptide receptor                                    |
| WBGene00006647  | <i>tsr-1</i>      | 100%_Emb                   | 50%_Emb                     | 4                        | 2                          | Cell Architecture    | Nuclear transport receptor                               |
| WBGene00007275  | <i>C03D6.1</i>    | Gro                        | Wt                          | 4                        | 2                          | Unknown              | Protein of unknown function                              |
| WBGene00008670  | <i>F11A3.2</i>    | 20-40%_Emb;Gro             | Wt                          | 4                        | 2                          | Protein Synthesis    | Translation initiation factor eIF-2B subunit delta       |
| WBGene00009264  | <i>sac-1</i>      | Gro                        | Wt                          | 4                        | 2                          | Cell Architecture    | Inositol polyphosphate-5-phosphatase                     |
| WBGene00009626  | <i>F42A8.1</i>    | 50-80%_Emb;Lva;Dpy;Bmd;Wt  | Wt                          | 4                        | 2                          | Unknown              | Protein of unknown function                              |
| WBGene00010941  | <i>M176.2</i>     | 20-40%_Emb;Gro;Clr;Thn;P   | 20-40%_Emb;Weak Gro         | 4                        | 2                          | Metabolism           | Putative glutathione synthetase                          |
| WBGene00012235  | <i>W04A4.6</i>    | 90%_Emb;Gro;Unc;Bmd        | Wt                          | 4                        | 2                          | Unknown              | Protein of unknown function                              |
| WBGene00012803  | <i>Y43F4B.5</i>   | Gro;Lvl                    | Wt                          | 4                        | 2                          | Metabolism           | Putative phosphomannomutase                              |
| WBGene00014066  | <i>rev-1</i>      | 100%_Emb                   | Wt                          | 4                        | 2                          | DNA/Cell Cycle       | Translesion DNA polymerase                               |
| WBGene00016020  | <i>sptl-1</i>     | Gro;Lvl;Unc                | Unc                         | 4                        | 2                          | Metabolism           | Putative subunit of serine palmitoyltransferase          |
| WBGene00016323  | <i>C32E8.5</i>    | 100%_Emb;1-May;Gro         | 20%_Emb                     | 4                        | 2                          | RNA Synthesis        | Similarity to Smad nuclear-interacting protein           |
| WBGene00016721  | <i>C46G7.1</i>    | Gro                        | Wt                          | 4                        | 2                          | Unknown              | Protein of unknown function                              |
| WBGene00017358  | <i>F10E9.7</i>    | Ste;Gro;Sck                | Wt                          | 4                        | 2                          | Unknown              | Protein of unknown function                              |
| WBGene00017769  | <i>F25B4.6</i>    | 20-40%_Emb;Gro;Lvl;Bmd;L   | Wt                          | 4                        | 2                          | Metabolism           | Hydroxymethylglutaryl-CoA synthase                       |
| WBGene00017853  | <i>F27C1.3</i>    | Gro;Stp                    | Wt                          | 4                        | 2                          | Unknown              | Protein of unknown function                              |
| WBGene00018793  | <i>F54C4.1</i>    | 20-40%_Emb;Gro             | 20-40%_Emb                  | 4                        | 2                          | Protein Synthesis    | Putative mitochondrial ribosome L30                      |
| WBGene00018961  | <i>F56D1.3</i>    | 10%_Emb;Gro                | Wt                          | 4                        | 2                          | Protein Synthesis    | Subunit of mitochondrial ribosome (S)                    |
| WBGene00019126  | <i>F59E12.11</i>  | 100%_Emb                   | Wt                          | 4                        | 2                          | Unknown              | Protein of unknown function                              |
| WBGene00019455  | <i>K06H7.1</i>    | 100%_Emb;Adl;Lvl;Pvl       | Wt                          | 4                        | 2                          | Unknown              | Protein of unknown function                              |
| WBGene00021365  | <i>smgl-2</i>     | 100%_Emb;Unc;Lvl;Dpy       | Wt                          | 4                        | 2                          | NA Binding           | DEAH helicase                                            |
| WBGene00021465  | <i>Y39G10AR.7</i> | 100%_Emb;1-May;Lva;Dpy;    | Wt                          | 4                        | 2                          | Unknown              | Protein of unknown function                              |
| WBGene00021468  | <i>epg-2</i>      | 100%_Emb;Lvl               | Wt                          | 4                        | 2                          | Unknown              | Protein of unknown function                              |
| WBGene00021626  | <i>Y47D7A.14</i>  | 90%_Emb                    | Wt                          | 4                        | 2                          | Metabolism           | Putative riboflavin transporter                          |
| WBGene00022027  | <i>vps-20</i>     | Gro;Unc;Prz                | Weak Gro;Unc;Prz            | 4                        | 2                          | Cell Architecture    | VPS-20 orthologue; likely role in trafficking            |
| WBGene00022117  | <i>Y71F9AL.12</i> | 20-40%_Emb;Ste             | Wt                          | 4                        | 2                          | Unknown              | Protein of unknown function                              |
| WBGene00000254  | <i>bli-4</i>      | Mlt;Dpy;Lvl                | Mlt                         | 4                        | 1                          | Proteases            | KEX2/subtilisin serine endoprotease                      |
| WBGene00000431  | <i>ceh-6</i>      | Unc;Mlt                    | Wt                          | 4                        | 1                          | Transcription Factor | POU family homeodomain protein                           |
| WBGene00002152  | <i>iars-1</i>     | 50-80%_Emb;Red;Gro         | Gro                         | 4                        | 1                          | Protein Synthesis    | Isoleucyl-tRNA synthetase                                |
| WBGene00003904  | <i>pabp-2</i>     | 90%_Emb;Lva;Unc            | Wt                          | 4                        | 1                          | RNA Synthesis        | Polyadenylate-binding protein                            |
| WBGene00003912  | <i>pal-1</i>      | 100%_Emb                   | Wt                          | 4                        | 1                          | Transcription Factor | Homeodomain protein; <i>C. elegans</i> Caudal orthologue |
| WBGene00004194  | <i>prx-5</i>      | Gro;Clr;Thn                | Wt                          | 4                        | 1                          | Cell Architecture    | Receptor for peroxisomal targeting signal                |
| WBGene00004705  | <i>rsp-8</i>      | Gro                        | Wt                          | 4                        | 1                          | RNA Synthesis        | Likely splicing factor                                   |
| WBGene00004786  | <i>sex-1</i>      | 20-40%_Emb;mult;Dpy;Bmd    | Wt                          | 4                        | 1                          | Transcription Factor | Nuclear hormone receptor                                 |
| WBGene00004951  | <i>spc-1</i>      | mult;Bmd;Dpy               | Wt                          | 4                        | 1                          | Cell Architecture    | Alpha spectrin                                           |
| WBGene00014229  | <i>ZK1128.3</i>   | Gro;Unc;Rup;Pvl            | Wt                          | 4                        | 1                          | Unknown              | Protein of unknown function                              |
| WBGene00017916  | <i>F29A7.6</i>    | Gro;Stp;Pch;Pvl            | Weak Gro                    | 4                        | 1                          | Unknown              | Protein of unknown function                              |

|                |                  |                          |                |   |   |                          |                                                     |
|----------------|------------------|--------------------------|----------------|---|---|--------------------------|-----------------------------------------------------|
| WBGene00000817 | <i>csn-5</i>     | 50-80%_Emb               | Wt             | 3 | 2 | Degradation              | Subunit 5 of the COP9 signalosome complex           |
| WBGene00001086 | <i>dpy-27</i>    | Dpy;Egl                  | Wt             | 3 | 2 | Chromatin                | SMC family member, dosage compensation              |
| WBGene00001662 | <i>gop-3</i>     | 100%_Emb;Gro             | Gro            | 3 | 2 | Metabolism               | Similarity to mitochondrial SAM50                   |
| WBGene00004374 | <i>rme-2</i>     | Ste                      | Gro            | 3 | 2 | Cell Architecture        | LDL-receptor related                                |
| WBGene00004700 | <i>rsp-3</i>     | 100%_Emb                 | 50%_Emb        | 3 | 2 | RNA Synthesis            | Likely SR-family splice factor                      |
| WBGene00004855 | <i>sma-1</i>     | Gro;Bmd;Sma;Rol          | Wt             | 3 | 2 | Cell Architecture        | Beta-H spectrin                                     |
| WBGene00008166 | <i>saps-1</i>    | 50-80%_Emb;Unc;Clr;Stp   | 50-80%_Emb     | 3 | 2 | Unknown                  | Protein of unknown function                         |
| WBGene00011538 | <i>T06E6.1</i>   | Gro                      | Weak Gro       | 3 | 2 | Unknown                  | Protein of unknown function                         |
| WBGene00015146 | <i>abi-1</i>     | 50-80%_Emb;Bmd;Adl       | Wt             | 3 | 2 | Signalling               | Orthologue of human Abi interactor SSH3BP1          |
| WBGene00015298 | <i>C01F1.3</i>   | Lvl;Unc;Pch              | Wt             | 3 | 2 | Metabolism               | Putative thymidine diphosphoglucose 4               |
| WBGene00016442 | <i>C35D10.5</i>  | 20-40%_Emb;Gro           | Wt             | 3 | 2 | Metabolism               | Ubiquinol-cytochrome c reductase complex chaperone  |
| WBGene00017852 | <i>F27C1.2</i>   | Him                      | Wt             | 3 | 2 | Small Molecule Transport | Similarity to copper transporter                    |
| WBGene00017982 | <i>F32D1.2</i>   | 50-80%_Emb;Gro;Stp       | Gro            | 3 | 2 | Metabolism               | Hypersensitive to pore forming toxin                |
| WBGene00018144 | <i>F37C4.4</i>   | 50-80%_Emb               | 50%_Emb        | 3 | 2 | Unknown                  | Protein of unknown function                         |
| WBGene00019400 | <i>K04G7.1</i>   | 50-80%_Emb;Gro;Thn;Stp   | Gro            | 3 | 2 | Unknown                  | Protein of unknown function                         |
| WBGene00020149 | <i>T01D1.4</i>   | Unc;Dpy                  | Wt             | 3 | 2 | Metabolism               | Similarity to methylthiopentene dioxygenase         |
| WBGene00020705 | <i>T22H9.1</i>   | Gro;Pch;Stp              | Wt             | 3 | 2 | Protein Synthesis        | Similarity to Ribosomal RNA processing protein 36   |
| WBGene00022201 | <i>Y71H10B.1</i> | Gro;Clr;Thn;Stp          | Wt             | 3 | 2 | Metabolism               | Purine nucleotidase                                 |
| WBGene00000675 | <i>col-101</i>   | Gro;Clr;Sma              | Wt             | 3 | 1 | Collagen                 | Cuticle collagen                                    |
| WBGene00001465 | <i>flr-1</i>     | Gro;Clr                  | Weak Gro       | 3 | 1 | Small Molecule Transport | Amiloride-sensitive sodium channel                  |
| WBGene00001824 | <i>hbl-1</i>     | 20-40%_Emb;mult;Pvl;Dpy  | 20-40%_Emb     | 3 | 1 | Transcription Factor     | C2H2 zinc finger TF related to Drosophila hunchback |
| WBGene00001974 | <i>hmg-4</i>     | 50-80%_Emb;Gro;Unc;Prz;L | 50-80%_Emb;Gro | 3 | 1 | Chromatin                | Putative FACT complex subunit                       |
| WBGene00003159 | <i>mcm-7</i>     | 100%_Emb                 | 50-80%_Emb     | 3 | 1 | DNA/Cell Cycle           | MCM complex subunit                                 |
| WBGene00004197 | <i>prx-12</i>    | Gro;Clr                  | Weak Gro;Clr   | 3 | 1 | Cell Architecture        | Peroxisome assembly factor                          |
| WBGene00004201 | <i>prx-19</i>    | Gro                      | Wt             | 3 | 1 | Cell Architecture        | Peroxisome assembly factor                          |
| WBGene00004271 | <i>rab-7</i>     | 20-40%_Emb;Prz;Bmd;Dpy   | Prz;Bmd;Dpy    | 3 | 1 | Cell Architecture        | Rab GTPase                                          |
| WBGene00004735 | <i>sbp-1</i>     | 6-Oct;Gro;Clr;Sck        | Wt             | 3 | 1 | Transcription Factor     | Basic helix-loop-helix (bHLH) related to SREBPs     |
| WBGene00006914 | <i>vha-5</i>     | 10%_Emb;Gro;mult;Unc;Clr | 10%_Emb        | 3 | 1 | Small Molecule Transport | Subunit of vacuolar proton-translocating ATPase     |
| WBGene00009259 | <i>F29G6.3</i>   | Gro;Clr                  | Wt             | 3 | 1 | Unknown                  | Protein of unknown function                         |
| WBGene00009504 | <i>F37B12.1</i>  | Pvl;Rup;Egl              | Wt             | 3 | 1 | Unknown                  | Protein of unknown function                         |
| WBGene00009880 | <i>F49C12.11</i> | Unc;Dpy                  | Wt             | 3 | 1 | Unknown                  | Protein of unknown function                         |
| WBGene00012704 | <i>Y39C12A.1</i> | Unc;Lvl;Clr              | Wt             | 3 | 1 | Signalling               | Protein of unknown function                         |
| WBGene00012885 | <i>Y45F10D.4</i> | Gro                      | Wt             | 3 | 1 | Metabolism               | Iron-sulfur cluster assembly enzyme                 |
| WBGene00013585 | <i>cyp-42A1</i>  | Unc                      | Wt             | 3 | 1 | Metabolism               | Cytochrome P450                                     |
| WBGene00016169 | <i>C27F2.7</i>   | Gro;Bmd                  | Wt             | 3 | 1 | Unknown                  | Protein of unknown function                         |
| WBGene00018492 | <i>F46E10.11</i> | Gro;Lvl;Prz              | Wt             | 3 | 1 | Unknown                  | Protein of unknown function                         |
| WBGene00022631 | <i>nekl-2</i>    | Unc;Lvl;Rol              | Unc;Sck        | 3 | 1 | Signalling               | Serine/threonine protein kinase                     |
