# Supplementary material for: Comparative RNAi Screens in C. elegans and C. briggsae Reveal the Impact of Developmental System Drift on Gene Function
Source: PubMed Central journal article supplement (PMC3916228; doi:10.1371/journal.pgen.1004077), 2014-02-06
Supplement: pgen.1004077.s009.pdf [file pgen.1004077.s009.pdf]

| Gene(WBID)     | Gene(Common)    | Manual Phenotype    | <i>C. elegans</i> Fitness | <i>C. briggsae</i> Fitness | Log2( <i>C. elegans</i> Fitness / <i>C. briggsae</i> Fitness) | Empirical P-value |
|----------------|-----------------|---------------------|---------------------------|----------------------------|---------------------------------------------------------------|-------------------|
| WBGene00000041 | <i>aco-2</i>    | Different Phenotype | 0.340243818               | 0.244541485                | 0.476489722                                                   | 0.935483871       |
| WBGene00000156 | <i>apr-1</i>    | Same Phenotype      | 0.496669134               | 1.050617284                | -1.080880227                                                  | 0.009677419       |
| WBGene00000207 | <i>asb-2</i>    | Different Phenotype | 0.244614315               | 0.074682814                | 1.711660637                                                   | 1                 |
| WBGene00000252 | <i>bli-2</i>    | Different Phenotype | 0.851588431               | 1.027068178                | -0.270303698                                                  | 0.193548387       |
| WBGene00000254 | <i>bli-4</i>    | Same Phenotype      | 0.049707467               | 0.065946245                | -0.407827939                                                  | 0.106451613       |
| WBGene00000254 | <i>bli-4</i>    | Same Phenotype      | 0.060822218               | 0.069548351                | -0.193418789                                                  | 0.25483871        |
| WBGene00000255 | <i>bli-5</i>    | Same Phenotype      | 1.043742868               | 0.926251243                | 0.172290861                                                   | 0.716129032       |
| WBGene00000263 | <i>F23H11.5</i> | Different Phenotype | 0.268389662               | 0.330661323                | -0.301025202                                                  | 0.158064516       |
| WBGene00000275 | <i>bub-1</i>    | Different Phenotype | 0.799621033               | 0.193714051                | 2.045387817                                                   | 1                 |
| WBGene00000286 | <i>cal-2</i>    | Different Phenotype | 1.214638971               | 0.856552538                | 0.503913919                                                   | 0.951612903       |
| WBGene00000292 | <i>cap-1</i>    | Different Phenotype | 0.441671678               | 0.646990741                | -0.550770743                                                  | 0.058064516       |
| WBGene00000413 | <i>cdt-1</i>    | Different Phenotype | 0.220588235               | 0.215289982                | 0.035074658                                                   | 0.509677419       |
| WBGene00000431 | <i>ceh-6</i>    | Same Phenotype      | 0.384900074               | 0.994567901                | -1.369585922                                                  | 0.001612903       |
| WBGene00000453 | <i>ceh-32</i>   | Different Phenotype | 0.821756534               | 1.056137899                | -0.362015291                                                  | 0.135483871       |
| WBGene00000502 | <i>chp-1</i>    | Different Phenotype | 0.247571294               | 0.107521043                | 1.203225012                                                   | 1                 |
| WBGene00000615 | <i>col-38</i>   | Different Phenotype | 0.841320072               | 0.242712671                | 1.793405337                                                   | 1                 |
| WBGene00000705 | <i>col-131</i>  | Different Phenotype | 0.224420768               | 1.043197225                | -2.216733844                                                  | 0.001612903       |
| WBGene00000750 | <i>col-177</i>  | Different Phenotype | 1.205157204               | 1.028978389                | 0.228008666                                                   | 0.803225806       |
| WBGene00000779 | <i>cpn-3</i>    | Different Phenotype | 0.783140081               | 1.021178387                | -0.382892616                                                  | 0.129032258       |
| WBGene00000817 | <i>csn-5</i>    | Same Phenotype      | 0.952076677               | 0.320977918                | 1.568603719                                                   | 1                 |
| WBGene00000868 | <i>cyb-3</i>    | Different Phenotype | 1.314523059               | 1.11550152                 | 0.236846971                                                   | 0.812903226       |
| WBGene00000874 | <i>cyk-3</i>    | Different Phenotype | 0.603841537               | 0.828405235                | -0.456166671                                                  | 0.087096774       |
| WBGene00001065 | <i>dpy-3</i>    | Different Phenotype | 0.586402266               | 1.176617537                | -1.00468286                                                   | 0.016129032       |
| WBGene00001066 | <i>dpy-4</i>    | Different Phenotype | 0.852440409               | 0.686796471                | 0.311716357                                                   | 0.851612903       |
| WBGene00001070 | <i>dpy-8</i>    | Different Phenotype | 0.068797776               | 0.873990773                | -3.66718421                                                   | 0.001612903       |
| WBGene00001073 | <i>dpy-11</i>   | Different Phenotype | 0.931183571               | 0.896139557                | 0.055342181                                                   | 0.541935484       |
| WBGene00001076 | <i>dpy-17</i>   | Different Phenotype | 1.320078962               | 0.81587473                 | 0.694204667                                                   | 0.990322581       |
| WBGene00001077 | <i>dpy-18</i>   | Different Phenotype | 0.462282032               | 0.409767198                | 0.173968789                                                   | 0.719354839       |
| WBGene00001079 | <i>dpy-20</i>   | Different Phenotype | 0.842075578               | 0.224082073                | 1.909922486                                                   | 1                 |
| WBGene00001086 | <i>dpy-27</i>   | Same Phenotype      | 0.867820464               | 1.165561816                | -0.425557009                                                  | 0.106451613       |
| WBGene00001184 | <i>egl-15</i>   | Different Phenotype | 1.219480519               | 0.998777693                | 0.288031207                                                   | 0.838709677       |
| WBGene00001207 | <i>egl-43</i>   | Different Phenotype | 0.228486647               | 0.497638725                | -1.122988902                                                  | 0.009677419       |
| WBGene00001214 | <i>ego-1</i>    | Different Phenotype | 0.487293363               | 0.948395062                | -0.960697578                                                  | 0.016129032       |
| WBGene00001227 | <i>eif-3.D</i>  | Different Phenotype | 0.259708738               | 0.288639366                | -0.15237352                                                   | 0.316129032       |
| WBGene00001229 | <i>eif-3.F</i>  | Different Phenotype | 0.152324431               | 1.003541913                | -2.719881613                                                  | 0.001612903       |
| WBGene00001230 | <i>eif-3.G</i>  | Different Phenotype | 0.979393652               | 0.90221857                 | 0.118411864                                                   | 0.64516129        |
| WBGene00001231 | <i>eif-3.H</i>  | Different Phenotype | 0.105131039               | 0.775935982                | -2.883748956                                                  | 0.001612903       |
| WBGene00001284 | <i>emb-30</i>   | Different Phenotype | 0.734663866               | 0.449490662                | 0.708793172                                                   | 0.993548387       |
| WBGene00001330 | <i>eps-8</i>    | Different Phenotype | 1                         | 0.95238846                 | 0.070377956                                                   | 0.564516129       |
| WBGene00001345 | <i>fos-1</i>    | Same Phenotype      | 0.664384796               | 0.868034243                | -0.385732899                                                  | 0.125806452       |

## Sheet1

|                |                |                     |             |             |              |             |
|----------------|----------------|---------------------|-------------|-------------|--------------|-------------|
| WBGene00001385 | <i>far-1</i>   | Different Phenotype | 0.501213592 | 0.731175694 | -0.544792573 | 0.061290323 |
| WBGene00001411 | <i>fem-1</i>   | Different Phenotype | 0.084185207 | 0.054976852 | 0.614742457  | 0.977419355 |
| WBGene00001423 | <i>fib-1</i>   | Different Phenotype | 0.509683794 | 0.354985192 | 0.521843636  | 0.95483871  |
| WBGene00001561 | <i>gei-4</i>   | Different Phenotype | 0.041244403 | 0.972448755 | -4.559351983 | 0.001612903 |
| WBGene00001570 | <i>gei-13</i>  | Different Phenotype | 0.281553398 | 0.966314399 | -1.779084096 | 0.001612903 |
| WBGene00001627 | <i>gly-2</i>   | Different Phenotype | 0.824712178 | 0.871767569 | -0.080052824 | 0.383870968 |
| WBGene00001832 | <i>hcp-4</i>   | Different Phenotype | 0.05202131  | 0.077654086 | -0.577959117 | 0.05483871  |
| WBGene00001834 | <i>hda-1</i>   | Different Phenotype | 0.299407115 | 0.049555775 | 2.594983409  | 1           |
| WBGene00001840 | <i>hel-1</i>   | Different Phenotype | 1.090524535 | 1.136069114 | -0.059028378 | 0.406451613 |
| WBGene00001862 | <i>him-3</i>   | Different Phenotype | 0.065544197 | 0.51244213  | -2.966849123 | 0.001612903 |
| WBGene00001872 | <i>him-14</i>  | Different Phenotype | 1.004460019 | 0.892584593 | 0.170359331  | 0.716129032 |
| WBGene00001980 | <i>hmr-1</i>   | Same Phenotype      | 0.482664483 | 0.812826249 | -0.751926324 | 0.029032258 |
| WBGene00001981 | <i>hnd-1</i>   | Different Phenotype | 0.657657658 | 0.83116224  | -0.337793326 | 0.141935484 |
| WBGene00002007 | <i>hsp-3</i>   | Different Phenotype | 0.744854105 | 0.974214145 | -0.387281058 | 0.125806452 |
| WBGene00002047 | <i>icp-1</i>   | Different Phenotype | 0.903846154 | 0.307557118 | 1.555222864  | 1           |
| WBGene00002068 | <i>ify-1</i>   | Different Phenotype | 0.537256763 | 2.236624204 | -2.057639232 | 0.001612903 |
| WBGene00002072 | <i>ima-1</i>   | Different Phenotype | 0.918766188 | 0.914279059 | 0.007063188  | 0.493548387 |
| WBGene00002081 | <i>ina-1</i>   | Different Phenotype | 0.667475728 | 1.228533686 | -0.880150135 | 0.019354839 |
| WBGene00002094 | <i>ins-11</i>  | Different Phenotype | 1.355532787 | 1.161754134 | 0.222555231  | 0.803225806 |
| WBGene00002148 | <i>gon-14</i>  | Different Phenotype | 1.067014952 | 0.900823776 | 0.244263581  | 0.812903226 |
| WBGene00002152 | <i>iars-1</i>  | Same Phenotype      | 1.136428571 | 1.188986641 | -0.065225497 | 0.403225806 |
| WBGene00002229 | <i>kfp-19</i>  | Different Phenotype | 0.592146363 | 0.837714534 | -0.500504887 | 0.070967742 |
| WBGene00002231 | <i>knl-1</i>   | Different Phenotype | 0.230043391 | 0.289665211 | -0.332480415 | 0.141935484 |
| WBGene00002245 | <i>lag-1</i>   | Different Phenotype | 0.909744409 | 0.199526814 | 2.18887864   | 1           |
| WBGene00002368 | <i>let-99</i>  | Different Phenotype | 0.922274563 | 0.376935555 | 1.290878421  | 1           |
| WBGene00002915 | <i>let-805</i> | Different Phenotype | 0.210735586 | 0.352705411 | -0.743029749 | 0.029032258 |
| WBGene00003001 | <i>lin-12</i>  | Different Phenotype | 0.671930238 | 0.564910734 | 0.250288542  | 0.812903226 |
| WBGene00003003 | <i>lin-14</i>  | Different Phenotype | 0.761781076 | 0.458823529 | 0.731437072  | 0.996774194 |
| WBGene00003009 | <i>lin-23</i>  | Different Phenotype | 1.236680328 | 0.315600288 | 1.970302198  | 1           |
| WBGene00003012 | <i>lin-26</i>  | Different Phenotype | 0.932868494 | 0.968055978 | -0.053416755 | 0.412903226 |
| WBGene00003024 | <i>lin-39</i>  | Different Phenotype | 0.994558854 | 1.358806405 | -0.450211272 | 0.096774194 |
| WBGene00003026 | <i>lin-41</i>  | Different Phenotype | 0.103467103 | 0.438478747 | -2.08333477  | 0.001612903 |
| WBGene00003026 | <i>lin-41</i>  | Different Phenotype | 0.125580126 | 0.44643301  | -1.829835547 | 0.001612903 |
| WBGene00003037 | <i>lin-54</i>  | Different Phenotype | 0.808882907 | 0.837192155 | -0.049627917 | 0.412903226 |
| WBGene00003044 | <i>lir-1</i>   | Same Phenotype      | 0.190448457 | 0.654305928 | -1.780564746 | 0.001612903 |
| WBGene00003053 | <i>Imp-1</i>   | Different Phenotype | 0.465731735 | 0.497298625 | -0.094613251 | 0.370967742 |
| WBGene00003056 | <i>lon-2</i>   | Different Phenotype | 0.096942321 | 0.301326413 | -1.636128609 | 0.001612903 |
| WBGene00003065 | <i>lpd-9</i>   | Different Phenotype | 0.54320697  | 0.150011647 | 1.856427475  | 1           |
| WBGene00003066 | <i>lpl-1</i>   | Different Phenotype | 0.378935223 | 0.274867231 | 0.463216326  | 0.925806452 |
| WBGene00003071 | <i>lrp-1</i>   | Different Phenotype | 0.063903282 | 0.554814815 | -3.118044389 | 0.001612903 |
| WBGene00003080 | <i>lsm-6</i>   | Different Phenotype | 0.775609756 | 0.764817836 | 0.020214783  | 0.506451613 |

Sheet1

|                |                 |                     |             |             |              |             |
|----------------|-----------------|---------------------|-------------|-------------|--------------|-------------|
| WBGene00003134 | <i>mat-3</i>    | Different Phenotype | 0.195332136 | 0.460931119 | -1.238621848 | 0.001612903 |
| WBGene00003160 | <i>mdf-1</i>    | Different Phenotype | 1.083318716 | 1.175188895 | -0.117434917 | 0.348387097 |
| WBGene00003209 | <i>mel-26</i>   | Same Phenotype      | 0.395390071 | 0.908952187 | -1.200927765 | 0.003225806 |
| WBGene00003210 | <i>mel-28</i>   | Same Phenotype      | 0.992513539 | 0.827933765 | 0.261571426  | 0.822580645 |
| WBGene00003214 | <i>mel-32</i>   | Different Phenotype | 1.268852459 | 0.62961211  | 1.010989129  | 1           |
| WBGene00003221 | <i>mes-3</i>    | Different Phenotype | 0.789407709 | 0.72549552  | 0.121803903  | 0.65483871  |
| WBGene00003229 | <i>mex-3</i>    | Different Phenotype | 0.548784338 | 0.142326379 | 1.947036232  | 1           |
| WBGene00003367 | <i>mix-1</i>    | Different Phenotype | 0.068361087 | 0.097053171 | -0.505600019 | 0.067741935 |
| WBGene00003392 | <i>mog-4</i>    | Different Phenotype | 0.728861052 | 0.346203531 | 1.07402337   | 1           |
| WBGene00003406 | <i>mrg-1</i>    | Different Phenotype | 0.486836234 | 0.069302629 | 2.812454566  | 1           |
| WBGene00003576 | <i>ndc-80</i>   | Different Phenotype | 1.129642857 | 1.109644835 | 0.025768742  | 0.509677419 |
| WBGene00003792 | <i>npp-6</i>    | Different Phenotype | 0.047633873 | 0.086575022 | -0.861962993 | 0.019354839 |
| WBGene00003836 | <i>next-1</i>   | Different Phenotype | 0.06902439  | 0.07096248  | -0.039950184 | 0.422580645 |
| WBGene00003901 | <i>paa-1</i>    | Different Phenotype | 0.763505402 | 0.188075618 | 2.021325534  | 1           |
| WBGene00003912 | <i>pal-1</i>    | Same Phenotype      | 0.899901865 | 0.910698497 | -0.017205821 | 0.470967742 |
| WBGene00003917 | <i>par-2</i>    | Different Phenotype | 0.545421903 | 0.271712497 | 1.005291718  | 1           |
| WBGene00003920 | <i>par-5</i>    | Different Phenotype | 1.055854643 | 0.921692966 | 0.196053091  | 0.758064516 |
| WBGene00003927 | <i>pas-6</i>    | Different Phenotype | 1.021617727 | 0.985624293 | 0.051745743  | 0.541935484 |
| WBGene00003947 | <i>pbs-1</i>    | Different Phenotype | 1.013375295 | 0.725680934 | 0.481761292  | 0.938709677 |
| WBGene00003950 | <i>pbs-4</i>    | Different Phenotype | 0.06378276  | 0.156044584 | -1.290719861 | 0.001612903 |
| WBGene00004013 | <i>pha-4</i>    | Different Phenotype | 1.120022916 | 0.72112462  | 0.635207747  | 0.987096774 |
| WBGene00004027 | <i>pie-1</i>    | Different Phenotype | 0.384465705 | 0.215089747 | 0.837916153  | 0.996774194 |
| WBGene00004038 | <i>plc-3</i>    | Different Phenotype | 0.283848359 | 0.223182145 | 0.346898787  | 0.874193548 |
| WBGene00004125 | <i>mdt-30</i>   | Different Phenotype | 0.849253731 | 1.177727784 | -0.471738561 | 0.080645161 |
| WBGene00004134 | <i>pqn-47</i>   | Different Phenotype | 0.073619632 | 1.076233184 | -3.869756349 | 0.001612903 |
| WBGene00004161 | <i>pqn-80</i>   | Different Phenotype | 0.4194556   | 0.458831197 | -0.129445379 | 0.335483871 |
| WBGene00004166 | <i>pqn-85</i>   | Different Phenotype | 0.907360862 | 0.776476994 | 0.224733251  | 0.803225806 |
| WBGene00004271 | <i>rab-7</i>    | Same Phenotype      | 0.419750177 | 0.812431122 | -0.952714573 | 0.016129032 |
| WBGene00004374 | <i>rme-2</i>    | Same Phenotype      | 0.607028754 | 0.281545741 | 1.108395528  | 1           |
| WBGene00004397 | <i>rol-6</i>    | Different Phenotype | 1.078209765 | 1.57138608  | -0.543399805 | 0.061290323 |
| WBGene00004416 | <i>rpl-5</i>    | Different Phenotype | 0.108047016 | 0.081201666 | 0.412078006  | 0.9         |
| WBGene00004425 | <i>rpl-13</i>   | Different Phenotype | 0.054310073 | 0.076307516 | -0.49060538  | 0.074193548 |
| WBGene00004427 | <i>rpl-15</i>   | Different Phenotype | 0.068732487 | 0.039328262 | 0.805425742  | 0.996774194 |
| WBGene00004432 | <i>rpl-20</i>   | Different Phenotype | 0.327476038 | 0.56466877  | -0.786015495 | 0.025806452 |
| WBGene00004438 | <i>rpl-25.1</i> | Different Phenotype | 0.213336239 | 0.167874094 | 0.345749436  | 0.870967742 |
| WBGene00004452 | <i>rpl-38</i>   | Different Phenotype | 0.124033228 | 0.083333333 | 0.573761074  | 0.964516129 |
| WBGene00004453 | <i>rpl-39</i>   | Different Phenotype | 1.272356215 | 1.046142093 | 0.282423811  | 0.835483871 |
| WBGene00004456 | <i>rpl-43</i>   | Different Phenotype | 0.063606794 | 0.070075758 | -0.139734556 | 0.325806452 |
| WBGene00004483 | <i>rps-14</i>   | Different Phenotype | 0.490070423 | 0.175014732 | 1.485512712  | 1           |
| WBGene00004489 | <i>rps-20</i>   | Different Phenotype | 0.209276018 | 0.214411248 | -0.034973594 | 0.432258065 |
| WBGene00004700 | <i>rsp-3</i>    | Same Phenotype      | 0.522365428 | 0.490110275 | 0.091953026  | 0.6         |

Sheet1

|                |                 |                     |             |             |              |             |
|----------------|-----------------|---------------------|-------------|-------------|--------------|-------------|
| WBGene00004704 | <i>rsp-7</i>    | Different Phenotype | 0.093339176 | 0.14061499  | -0.591195764 | 0.05483871  |
| WBGene00004726 | <i>sas-4</i>    | Different Phenotype | 0.929850746 | 0.367829021 | 1.337963851  | 1           |
| WBGene00004729 | <i>sax-3</i>    | Different Phenotype | 0.054696012 | 0.099675244 | -0.865799573 | 0.019354839 |
| WBGene00004735 | <i>sbp-1</i>    | Same Phenotype      | 0.653904473 | 0.628041309 | 0.058220437  | 0.54516129  |
| WBGene00004786 | <i>sex-1</i>    | Same Phenotype      | 0.504737091 | 0.057518488 | 3.13343445   | 1           |
| WBGene00004804 | <i>skn-1</i>    | Different Phenotype | 0.94828623  | 0.574652778 | 0.722632086  | 0.996774194 |
| WBGene00004949 | <i>sox-2</i>    | Different Phenotype | 0.787830808 | 0.55697446  | 0.50027466   | 0.948387097 |
| WBGene00004951 | <i>spc-1</i>    | Same Phenotype      | 0.548266972 | 1.183890578 | -1.110585271 | 0.009677419 |
| WBGene00004953 | <i>spd-2</i>    | Different Phenotype | 0.089007092 | 0.074262462 | 0.261287154  | 0.819354839 |
| WBGene00004955 | <i>spd-5</i>    | Different Phenotype | 0.059464508 | 0.45861363  | -2.947178486 | 0.001612903 |
| WBGene00004981 | <i>spl-1</i>    | Different Phenotype | 0.880562952 | 1.08973306  | -0.307476725 | 0.151612903 |
| WBGene00005018 | <i>sqt-3</i>    | Different Phenotype | 0.759635309 | 0.913389588 | -0.265923378 | 0.193548387 |
| WBGene00005237 | <i>srh-11</i>   | Different Phenotype | 0.945606695 | 1.03712297  | -0.133274808 | 0.332258065 |
| WBGene00006059 | <i>stc-1</i>    | Different Phenotype | 0.226039783 | 0.663593099 | -1.553722175 | 0.001612903 |
| WBGene00006379 | <i>sys-1</i>    | Different Phenotype | 0.049413049 | 0.045239871 | 0.127297284  | 0.658064516 |
| WBGene00006381 | <i>tac-1</i>    | Different Phenotype | 0.775671406 | 2.642857143 | -1.768580919 | 0.001612903 |
| WBGene00006463 | <i>nduf-2.2</i> | Different Phenotype | 0.492307692 | 0.291015625 | 0.758463667  | 0.996774194 |
| WBGene00006481 | <i>tag-135</i>  | Different Phenotype | 1.097175934 | 1.134598489 | -0.048386965 | 0.412903226 |
| WBGene00006565 | <i>tfg-1</i>    | Different Phenotype | 0.228506787 | 1.608963093 | -2.81582231  | 0.001612903 |
| WBGene00006577 | <i>tlf-1</i>    | Different Phenotype | 0.44787234  | 0.272889115 | 0.714772722  | 0.996774194 |
| WBGene00006579 | <i>tlk-1</i>    | Different Phenotype | 0.312815126 | 0.184210526 | 0.763954772  | 0.996774194 |
| WBGene00006617 | <i>tars-1</i>   | Different Phenotype | 0.152087994 | 0.17398374  | -0.194046211 | 0.25483871  |
| WBGene00006647 | <i>tsr-1</i>    | Same Phenotype      | 1.087272727 | 0.894672382 | 0.281282479  | 0.835483871 |
| WBGene00006773 | <i>unc-37</i>   | Different Phenotype | 0.992121553 | 0.091121495 | 3.444653561  | 1           |
| WBGene00006780 | <i>unc-44</i>   | Different Phenotype | 0.307507987 | 0.068611987 | 2.164091323  | 1           |
| WBGene00006933 | <i>vps-35</i>   | Different Phenotype | 1.244877049 | 0.465851905 | 1.418059963  | 1           |
| WBGene00006943 | <i>wrm-1</i>    | Different Phenotype | 1.08        | 0.484375    | 1.156835002  | 1           |
| WBGene00006983 | <i>zig-6</i>    | Different Phenotype | 0.573763347 | 0.894579066 | -0.640753188 | 0.04516129  |
| WBGene00006994 | <i>zyg-9</i>    | Different Phenotype | 1.688659794 | 0.86548913  | 0.964291098  | 1           |
| WBGene00007008 | <i>rfp-1</i>    | Different Phenotype | 1.004477612 | 1.70303712  | -0.761664472 | 0.029032258 |
| WBGene00007012 | <i>mdt-4</i>    | Different Phenotype | 0.802088277 | 0.33343949  | 1.266336049  | 1           |
| WBGene00007016 | <i>mdt-15</i>   | Different Phenotype | 0.252230769 | 0.216796875 | 0.218400317  | 0.8         |
| WBGene00007097 | <i>B0024.4</i>  | Different Phenotype | 0.703736187 | 0.528026709 | 0.414423793  | 0.9         |
| WBGene00007110 | <i>B0035.11</i> | Different Phenotype | 0.715015658 | 0.600114827 | 0.252736262  | 0.812903226 |
| WBGene00007171 | <i>B0393.6</i>  | Different Phenotype | 0.863591757 | 1.274977896 | -0.562050858 | 0.05483871  |
| WBGene00007192 | <i>B0491.5</i>  | Different Phenotype | 0.102999639 | 0.055871212 | 0.88246225   | 0.996774194 |
| WBGene00007275 | <i>C03D6.1</i>  | Same Phenotype      | 0.061425061 | 0.886403182 | -3.851063759 | 0.001612903 |
| WBGene00007332 | <i>C05C10.5</i> | Different Phenotype | 0.867659947 | 1.151825753 | -0.408720845 | 0.106451613 |
| WBGene00007385 | <i>atp-5</i>    | Different Phenotype | 0.078408288 | 0.074307011 | 0.077507817  | 0.570967742 |
| WBGene00007585 | <i>C14C10.2</i> | Different Phenotype | 0.803771239 | 0.897786977 | -0.159588213 | 0.306451613 |
| WBGene00007586 | <i>ril-2</i>    | Different Phenotype | 0.359683794 | 0.66041461  | -0.876642876 | 0.019354839 |

Sheet1

|                |                 |                     |             |             |              |             |
|----------------|-----------------|---------------------|-------------|-------------|--------------|-------------|
| WBGene00007587 | <i>C14C10.4</i> | Different Phenotype | 0.29071695  | 0.106989333 | 1.442148225  | 1           |
| WBGene00007684 | <i>C18E9.4</i>  | Different Phenotype | 0.426310584 | 0.237898465 | 0.841558908  | 0.996774194 |
| WBGene00007744 | <i>C26D10.3</i> | Different Phenotype | 1.169072165 | 0.970108696 | 0.26914568   | 0.832258065 |
| WBGene00007880 | <i>C33A12.1</i> | Different Phenotype | 0.82408898  | 0.356672158 | 1.208201516  | 1           |
| WBGene00007999 | <i>tag-297</i>  | Different Phenotype | 0.529225908 | 1.781632653 | -1.751244309 | 0.001612903 |
| WBGene00008021 | <i>C39B10.1</i> | Different Phenotype | 0.556546671 | 0.23412527  | 1.249222016  | 1           |
| WBGene00008061 | <i>C41G7.3</i>  | Different Phenotype | 0.760638298 | 0.888351984 | -0.223920836 | 0.219354839 |
| WBGene00008166 | <i>saps-1</i>   | Same Phenotype      | 1.624906786 | 1.0899729   | 0.576064694  | 0.967741935 |
| WBGene00008262 | <i>ril-1</i>    | Different Phenotype | 0.031620553 | 0.549654492 | -4.119590517 | 0.001612903 |
| WBGene00008363 | <i>D1046.2</i>  | Different Phenotype | 1.079759988 | 0.94055464  | 0.199126999  | 0.764516129 |
| WBGene00008413 | <i>D2030.3</i>  | Different Phenotype | 0.162595608 | 0.441481481 | -1.441064634 | 0.001612903 |
| WBGene00008441 | <i>E01B7.1</i>  | Different Phenotype | 0.72690167  | 0.587012987 | 0.308367798  | 0.848387097 |
| WBGene00008605 | <i>mlt-9</i>    | Different Phenotype | 0.965702545 | 0.309930638 | 1.639633501  | 1           |
| WBGene00008640 | <i>F10B5.3</i>  | Different Phenotype | 0.243298969 | 0.27513587  | -0.177414029 | 0.287096774 |
| WBGene00008684 | <i>mig-32</i>   | Different Phenotype | 0.941453567 | 0.334316472 | 1.4936755    | 1           |
| WBGene00008736 | <i>gnrr-6</i>   | Different Phenotype | 0.904547608 | 0.861339359 | 0.070614679  | 0.564516129 |
| WBGene00008990 | <i>smgl-1</i>   | Different Phenotype | 0.045863815 | 0.426791277 | -3.218102408 | 0.001612903 |
| WBGene00009013 | <i>F21D5.8</i>  | Different Phenotype | 0.95057979  | 0.28101197  | 1.758176147  | 1           |
| WBGene00009039 | <i>F22B3.8</i>  | Different Phenotype | 0.724107143 | 0.368849788 | 0.973169775  | 1           |
| WBGene00009092 | <i>tomm-20</i>  | Different Phenotype | 0.484044758 | 0.059385448 | 3.026959092  | 1           |
| WBGene00009159 | <i>F26E4.4</i>  | Different Phenotype | 0.050778051 | 0.072334079 | -0.510470495 | 0.067741935 |
| WBGene00009223 | <i>F28F8.5</i>  | Different Phenotype | 0.396846011 | 0.235905271 | 0.750371649  | 0.996774194 |
| WBGene00009242 | <i>sre-6</i>    | Different Phenotype | 0.812138221 | 0.90318046  | -0.153288988 | 0.312903226 |
| WBGene00009246 | <i>F29C12.4</i> | Different Phenotype | 0.555457174 | 0.075994318 | 2.86971222   | 1           |
| WBGene00009254 | <i>capg-1</i>   | Different Phenotype | 0.870005627 | 1.110851506 | -0.352569338 | 0.141935484 |
| WBGene00009259 | <i>F29G6.3</i>  | Same Phenotype      | 0.885727833 | 0.376078498 | 1.235829632  | 1           |
| WBGene00009264 | <i>sac-1</i>    | Same Phenotype      | 0.880496454 | 0.921922686 | -0.066328575 | 0.4         |
| WBGene00009284 | <i>F31C3.2</i>  | Different Phenotype | 0.824631101 | 1.098368522 | -0.413541407 | 0.106451613 |
| WBGene00009347 | <i>F32H5.1</i>  | Different Phenotype | 0.085375494 | 0.051530109 | 0.72840639   | 0.996774194 |
| WBGene00009364 | <i>F33H1.3</i>  | Different Phenotype | 1.114373357 | 0.919602819 | 0.277149877  | 0.832258065 |
| WBGene00009368 | <i>F33H2.5</i>  | Different Phenotype | 0.563348416 | 0.911247803 | -0.693815964 | 0.032258065 |
| WBGene00009371 | <i>F33H2.8</i>  | Different Phenotype | 0.988687783 | 1.228471002 | -0.313276893 | 0.148387097 |
| WBGene00009454 | <i>F36A2.7</i>  | Different Phenotype | 0.118430792 | 0.059012346 | 1.00495552   | 1           |
| WBGene00009477 | <i>tag-214</i>  | Different Phenotype | 0.077304965 | 0.12792472  | -0.726662106 | 0.029032258 |
| WBGene00009504 | <i>F37B12.1</i> | Same Phenotype      | 1.075173096 | 1.325265643 | -0.301712627 | 0.15483871  |
| WBGene00009505 | <i>F37B12.3</i> | Different Phenotype | 0.700296736 | 0.340023613 | 1.042331426  | 1           |
| WBGene00009587 | <i>F40F11.2</i> | Different Phenotype | 0.991071429 | 0.696480938 | 0.50890517   | 0.95483871  |
| WBGene00009588 | <i>F40F11.3</i> | Different Phenotype | 1.08375     | 1.024600847 | 0.080970004  | 0.577419355 |
| WBGene00009626 | <i>F42A8.1</i>  | Same Phenotype      | 0.836717428 | 1.116090713 | -0.4156419   | 0.106451613 |
| WBGene00009649 | <i>F43C1.5</i>  | Different Phenotype | 1.489065606 | 0.998496994 | 0.576577329  | 0.967741935 |
| WBGene00009661 | <i>patr-1</i>   | Different Phenotype | 1.101379567 | 0.917615176 | 0.263350592  | 0.822580645 |

## Sheet1

|                |                   |                     |             |             |              |             |
|----------------|-------------------|---------------------|-------------|-------------|--------------|-------------|
| WBGene00009688 | <i>F44E5.1</i>    | Different Phenotype | 0.649439827 | 0.178030303 | 1.867073033  | 1           |
| WBGene00009701 | <i>egg-3</i>      | Different Phenotype | 0.425055928 | 0.378319783 | 0.168046462  | 0.709677419 |
| WBGene00009725 | <i>F45E6.1</i>    | Different Phenotype | 0.776039197 | 0.815259685 | -0.071130152 | 0.396774194 |
| WBGene00009881 | <i>F49C12.12</i>  | Different Phenotype | 0.078133628 | 0.070184984 | 0.154781208  | 0.687096774 |
| WBGene00009915 | <i>F52A8.1</i>    | Different Phenotype | 0.999718627 | 0.964174455 | 0.052227895  | 0.541935484 |
| WBGene00009925 | <i>F52B11.2</i>   | Different Phenotype | 0.997294098 | 0.949550686 | 0.070774     | 0.564516129 |
| WBGene00010051 | <i>F54D5.5</i>    | Different Phenotype | 0.66442953  | 0.291056911 | 1.190814923  | 1           |
| WBGene00010094 | <i>tsfm-1</i>     | Different Phenotype | 0.556775798 | 0.454863875 | 0.291661639  | 0.84516129  |
| WBGene00010266 | <i>dct-18</i>     | Different Phenotype | 0.935229068 | 1.553061224 | -0.731723028 | 0.029032258 |
| WBGene00010267 | <i>lips-9</i>     | Different Phenotype | 1.194233807 | 1.918367347 | -0.683793692 | 0.035483871 |
| WBGene00010340 | <i>slcf-1</i>     | Different Phenotype | 0.62434865  | 0.155094495 | 2.00920441   | 1           |
| WBGene00010437 | <i>JC8.5</i>      | Different Phenotype | 1.001691189 | 0.982973356 | 0.027213591  | 0.509677419 |
| WBGene00010458 | <i>K01C8.6</i>    | Different Phenotype | 0.954878737 | 0.46787257  | 1.029201881  | 1           |
| WBGene00010638 | <i>K07F5.14</i>   | Different Phenotype | 0.993999707 | 0.444535969 | 1.160945269  | 1           |
| WBGene00010665 | <i>K08E3.5</i>    | Different Phenotype | 0.043507363 | 0.060612644 | -0.478359204 | 0.077419355 |
| WBGene00010993 | <i>R03E1.2</i>    | Different Phenotype | 0.951793899 | 0.902723735 | 0.076364666  | 0.567741935 |
| WBGene00011109 | <i>R07E5.1</i>    | Different Phenotype | 1.130218688 | 0.115230461 | 3.294007903  | 1           |
| WBGene00011115 | <i>R07E5.7</i>    | Different Phenotype | 0.574092247 | 0.736958444 | -0.360300697 | 0.135483871 |
| WBGene00011223 | <i>R10H10.4</i>   | Different Phenotype | 0.796607143 | 0.529814272 | 0.588381709  | 0.974193548 |
| WBGene00011350 | <i>T01H3.4</i>    | Different Phenotype | 0.532615026 | 0.375945353 | 0.502570164  | 0.948387097 |
| WBGene00011559 | <i>umps-1</i>     | Different Phenotype | 0.981235785 | 1.019604411 | -0.055337766 | 0.412903226 |
| WBGene00011634 | <i>T09A5.5</i>    | Different Phenotype | 0.769020619 | 0.323369565 | 1.249838377  | 1           |
| WBGene00011637 | <i>T09A5.9</i>    | Different Phenotype | 1.246391753 | 0.580842391 | 1.101538938  | 1           |
| WBGene00011674 | <i>cyp-13A8</i>   | Different Phenotype | 1.024539877 | 1.182254965 | -0.206565062 | 0.241935484 |
| WBGene00011687 | <i>T10C6.5</i>    | Different Phenotype | 1.322543684 | 1.239361702 | 0.093718083  | 0.603225806 |
| WBGene00011747 | <i>sna-2</i>      | Different Phenotype | 0.430557588 | 0.766611752 | -0.832289899 | 0.019354839 |
| WBGene00011768 | <i>oac-46</i>     | Different Phenotype | 0.27079566  | 0.11600238  | 1.223050218  | 1           |
| WBGene00011831 | <i>T19B10.2</i>   | Different Phenotype | 0.624440782 | 0.969718146 | -0.635000719 | 0.04516129  |
| WBGene00011885 | <i>T21B10.3</i>   | Different Phenotype | 1.174502712 | 0.811719215 | 0.532997375  | 0.958064516 |
| WBGene00012166 | <i>nuo-6</i>      | Different Phenotype | 0.295723129 | 0.061266874 | 2.271067926  | 1           |
| WBGene00012235 | <i>W04A4.6</i>    | Same Phenotype      | 0.04738933  | 1.05206334  | -4.472515481 | 0.001612903 |
| WBGene00012244 | <i>W04D2.5</i>    | Different Phenotype | 0.61230833  | 0.107626174 | 2.508229333  | 1           |
| WBGene00012256 | <i>lpr-5</i>      | Different Phenotype | 0.064917439 | 0.049607073 | 0.388060271  | 0.9         |
| WBGene00012261 | <i>lpr-3</i>      | Different Phenotype | 0.882153359 | 0.98870334  | -0.164508221 | 0.296774194 |
| WBGene00012354 | <i>W09C5.8</i>    | Different Phenotype | 1.017202931 | 0.889560835 | 0.193442347  | 0.758064516 |
| WBGene00012433 | <i>Y11D7A.9</i>   | Different Phenotype | 0.927264745 | 1.040087864 | -0.1656522   | 0.296774194 |
| WBGene00012469 | <i>Y17G7B.18</i>  | Different Phenotype | 0.94036863  | 0.116003788 | 3.019054498  | 1           |
| WBGene00012602 | <i>Y38E10A.24</i> | Different Phenotype | 0.827804107 | 1.887755102 | -1.189310304 | 0.009677419 |
| WBGene00012704 | <i>Y39C12A.1</i>  | Same Phenotype      | 0.914199192 | 1.055449049 | -0.207276485 | 0.238709677 |
| WBGene00012888 | <i>sas-6</i>      | Different Phenotype | 0.285641806 | 0.345420148 | -0.274145091 | 0.193548387 |
| WBGene00012966 | <i>exos-1</i>     | Different Phenotype | 0.908453374 | 0.969368108 | -0.093632148 | 0.370967742 |

## Sheet1

|                |                   |                     |             |             |              |             |
|----------------|-------------------|---------------------|-------------|-------------|--------------|-------------|
| WBGene00012972 | <i>rsa-2</i>      | Different Phenotype | 0.032410917 | 0.98582181  | -4.926775138 | 0.001612903 |
| WBGene00013021 | <i>Y48G10A.4</i>  | Different Phenotype | 0.290862656 | 0.078934741 | 1.881605774  | 1           |
| WBGene00013040 | <i>Y49E10.21</i>  | Different Phenotype | 0.512717537 | 0.97718879  | -0.930473069 | 0.016129032 |
| WBGene00013075 | <i>Y51A2D.7</i>   | Different Phenotype | 0.925296443 | 1.179269497 | -0.349905903 | 0.141935484 |
| WBGene00013109 | <i>Y51H4A.15</i>  | Different Phenotype | 0.924675325 | 0.98579068  | -0.092334451 | 0.374193548 |
| WBGene00013267 | <i>Y57A10A.27</i> | Different Phenotype | 1.039754246 | 0.074810606 | 3.796855948  | 1           |
| WBGene00013558 | <i>Y75B8A.25</i>  | Different Phenotype | 0.05243195  | 0.060612644 | -0.209172572 | 0.238709677 |
| WBGene00013605 | <i>Y95D11A.1</i>  | Different Phenotype | 0.904923383 | 0.217850288 | 2.054458628  | 1           |
| WBGene00014087 | <i>ZK809.5</i>    | Different Phenotype | 1.046601615 | 0.437693556 | 1.257719343  | 1           |
| WBGene00014112 | <i>ZK856.11</i>   | Different Phenotype | 0.643042147 | 0.714185884 | -0.151386319 | 0.316129032 |
| WBGene00014153 | <i>vab-23</i>     | Different Phenotype | 0.640566741 | 0.965853659 | -0.592455721 | 0.05483871  |
| WBGene00014224 | <i>ZK1098.7</i>   | Different Phenotype | 0.825       | 0.130093379 | 2.664846585  | 1           |
| WBGene00014229 | <i>ZK1128.3</i>   | Same Phenotype      | 0.381092437 | 1.058786078 | -1.474198248 | 0.001612903 |
| WBGene00015075 | <i>B0238.11</i>   | Different Phenotype | 0.61050754  | 0.512777609 | 0.251675848  | 0.812903226 |
| WBGene00015091 | <i>B0261.1</i>    | Different Phenotype | 0.254779066 | 0.069237035 | 1.879630894  | 1           |
| WBGene00015162 | <i>B0361.8</i>    | Different Phenotype | 1.011267606 | 1.136122569 | -0.167953667 | 0.296774194 |
| WBGene00015164 | <i>ykt-6</i>      | Different Phenotype | 0.4         | 0.409546258 | -0.034026413 | 0.432258065 |
| WBGene00015185 | <i>mrp1-41</i>    | Different Phenotype | 0.667542214 | 0.106035889 | 2.654306428  | 1           |
| WBGene00015235 | <i>cdc-26</i>     | Different Phenotype | 0.684449489 | 0.634836852 | 0.108558199  | 0.632258065 |
| WBGene00015297 | <i>sco-1</i>      | Different Phenotype | 0.819333333 | 0.155541947 | 2.397146804  | 1           |
| WBGene00015487 | <i>C05D11.10</i>  | Different Phenotype | 0.809230769 | 0.37109375  | 1.124767473  | 1           |
| WBGene00015513 | <i>C06A8.2</i>    | Different Phenotype | 0.606185567 | 0.43138587  | 0.490780582  | 0.94516129  |
| WBGene00015515 | <i>spd1-1</i>     | Different Phenotype | 0.611531741 | 0.530861186 | 0.204092722  | 0.770967742 |
| WBGene00015591 | <i>C08C3.4</i>    | Different Phenotype | 0.837523245 | 0.915574964 | -0.12854878  | 0.335483871 |
| WBGene00015791 | <i>C15C7.5</i>    | Different Phenotype | 0.952449155 | 1.257345491 | -0.400667142 | 0.106451613 |
| WBGene00015809 | <i>C16A3.4</i>    | Different Phenotype | 0.407692308 | 0.201171875 | 1.019052114  | 1           |
| WBGene00015811 | <i>C16A3.6</i>    | Different Phenotype | 0.250819672 | 0.163670766 | 0.615853844  | 0.977419355 |
| WBGene00016015 | <i>C23G10.8</i>   | Different Phenotype | 0.221311475 | 0.138126774 | 0.680085267  | 0.990322581 |
| WBGene00016074 | <i>C24H12.5</i>   | Same Phenotype      | 1.016135084 | 0.480967917 | 1.079079638  | 1           |
| WBGene00016115 | <i>mdt-26</i>     | Different Phenotype | 0.888993637 | 1.037690104 | -0.223130663 | 0.219354839 |
| WBGene00016140 | <i>rpb-2</i>      | Different Phenotype | 0.233562316 | 0.116268789 | 1.006343652  | 1           |
| WBGene00016169 | <i>C27F2.7</i>    | Same Phenotype      | 0.829244357 | 1.082670203 | -0.38472465  | 0.125806452 |
| WBGene00016170 | <i>C27F2.8</i>    | Different Phenotype | 0.903961585 | 1.369849733 | -0.599684275 | 0.051612903 |
| WBGene00016243 | <i>tag-319</i>    | Different Phenotype | 0.888177053 | 0.415955111 | 1.094419454  | 1           |
| WBGene00016250 | <i>C30C11.4</i>   | Different Phenotype | 0.686893204 | 1.503963012 | -1.130611371 | 0.009677419 |
| WBGene00016291 | <i>C31H1.8</i>    | Different Phenotype | 1.277672119 | 1.169870733 | 0.127168529  | 0.658064516 |
| WBGene00016319 | <i>C32D5.12</i>   | Different Phenotype | 1.019467213 | 0.762041697 | 0.419873533  | 0.906451613 |
| WBGene00016356 | <i>C33F10.8</i>   | Different Phenotype | 0.7643177   | 1.101608993 | -0.527367897 | 0.061290323 |
| WBGene00016449 | <i>C35D10.13</i>  | Different Phenotype | 0.24577891  | 0.926133909 | -1.913859679 | 0.001612903 |
| WBGene00016493 | <i>C37A2.7</i>    | Different Phenotype | 0.265053461 | 0.748182762 | -1.497107349 | 0.001612903 |
| WBGene00016581 | <i>C42C1.3</i>    | Different Phenotype | 0.247420937 | 0.288034053 | -0.219271799 | 0.222580645 |

## Sheet1

|                |                  |                     |             |             |              |             |
|----------------|------------------|---------------------|-------------|-------------|--------------|-------------|
| WBGene00016638 | <i>C44B12.5</i>  | Different Phenotype | 0.139977178 | 0.249486653 | -0.833771012 | 0.019354839 |
| WBGene00016676 | <i>C45G9.5</i>   | Different Phenotype | 0.679097154 | 0.50132626  | 0.437868181  | 0.912903226 |
| WBGene00016721 | <i>C46G7.1</i>   | Same Phenotype      | 0.106764082 | 1.170376901 | -3.454474925 | 0.001612903 |
| WBGene00016793 | <i>arp-11</i>    | Different Phenotype | 0.58420762  | 0.307943417 | 0.92381589   | 1           |
| WBGene00016955 | <i>C55C3.5</i>   | Different Phenotype | 0.74201278  | 0.240536278 | 1.625189537  | 1           |
| WBGene00016968 | <i>epg-5</i>     | Different Phenotype | 0.864880606 | 0.910465967 | -0.074104105 | 0.396774194 |
| WBGene00016977 | <i>C56G2.1</i>   | Different Phenotype | 1.08352459  | 1.126300851 | -0.055860349 | 0.412903226 |
| WBGene00016989 | <i>CD4.3</i>     | Different Phenotype | 1.065393623 | 0.873687611 | 0.286197112  | 0.838709677 |
| WBGene00017132 | <i>mel-47</i>    | Different Phenotype | 0.802088277 | 0.36910828  | 1.119716925  | 1           |
| WBGene00017166 | <i>aldo-2</i>    | Different Phenotype | 1.321538462 | 1.050130208 | 0.331650191  | 0.858064516 |
| WBGene00017237 | <i>pole-2</i>    | Different Phenotype | 0.844577784 | 0.973503569 | -0.20495597  | 0.24516129  |
| WBGene00017289 | <i>F09E5.11</i>  | Different Phenotype | 1.146179402 | 1.029299363 | 0.155170236  | 0.687096774 |
| WBGene00017313 | <i>cpsf-2</i>    | Different Phenotype | 0.434134362 | 0.980495519 | -1.175369419 | 0.009677419 |
| WBGene00017328 | <i>F10C5.2</i>   | Different Phenotype | 1.116319569 | 1.096378982 | 0.026003511  | 0.509677419 |
| WBGene00017348 | <i>F10E7.6</i>   | Different Phenotype | 0.851776354 | 0.229568187 | 1.891551947  | 1           |
| WBGene00017356 | <i>F10E9.4</i>   | Different Phenotype | 0.505970149 | 1.010123735 | -0.997407848 | 0.016129032 |
| WBGene00017358 | <i>F10E9.7</i>   | Same Phenotype      | 0.441791045 | 1.087739033 | -1.29989639  | 0.001612903 |
| WBGene00017369 | <i>F10G7.5</i>   | Different Phenotype | 1.013333333 | 0.881812615 | 0.200564802  | 0.764516129 |
| WBGene00017605 | <i>F19F10.9</i>  | Different Phenotype | 0.493422207 | 0.396942541 | 0.31389246   | 0.851612903 |
| WBGene00017641 | <i>csr-1</i>     | Different Phenotype | 0.494202098 | 0.480685528 | 0.040007768  | 0.529032258 |
| WBGene00017683 | <i>F21H12.1</i>  | Different Phenotype | 1.06557377  | 1.005751258 | 0.083356933  | 0.587096774 |
| WBGene00017716 | <i>F22F4.1</i>   | Different Phenotype | 0.061153579 | 0.055651672 | 0.136011888  | 0.667741935 |
| WBGene00017853 | <i>F27C1.3</i>   | Same Phenotype      | 0.511125039 | 1.06000543  | -1.052323482 | 0.009677419 |
| WBGene00017916 | <i>F29A7.6</i>   | Same Phenotype      | 0.867818182 | 0.765462339 | 0.181061414  | 0.729032258 |
| WBGene00017925 | <i>F29B9.11</i>  | Different Phenotype | 1.321793863 | 0.51459144  | 1.36099784   | 1           |
| WBGene00017926 | <i>F29C4.2</i>   | Different Phenotype | 0.469379992 | 0.059753593 | 2.973658967  | 1           |
| WBGene00017982 | <i>F32D1.2</i>   | Same Phenotype      | 0.488379759 | 0.634132338 | -0.37678054  | 0.132258065 |
| WBGene00017997 | <i>F33D4.5</i>   | Different Phenotype | 0.337934843 | 0.078346028 | 2.108813062  | 1           |
| WBGene00018144 | <i>F37C4.4</i>   | Same Phenotype      | 0.102281668 | 0.5         | -2.289380502 | 0.001612903 |
| WBGene00018151 | <i>F37C12.3</i>  | Different Phenotype | 0.237957746 | 0.558043606 | -1.22967244  | 0.001612903 |
| WBGene00018213 | <i>F39H12.2</i>  | Different Phenotype | 0.705205124 | 1.002585945 | -0.507611052 | 0.067741935 |
| WBGene00018350 | <i>F42C5.10</i>  | Different Phenotype | 1.221888154 | 0.874710648 | 0.482234472  | 0.938709677 |
| WBGene00018492 | <i>F46E10.11</i> | Same Phenotype      | 0.524410016 | 0.958972702 | -0.870794507 | 0.019354839 |
| WBGene00018609 | <i>F48E8.2</i>   | Different Phenotype | 1.226890756 | 1.21376636  | 0.015516055  | 0.503225806 |
| WBGene00018703 | <i>sec-3</i>     | Different Phenotype | 0.645238614 | 1.157631776 | -0.843271745 | 0.019354839 |
| WBGene00018772 | <i>F53G12.4</i>  | Different Phenotype | 1.053863508 | 0.195464363 | 2.430710524  | 1           |
| WBGene00018794 | <i>F54C4.3</i>   | Different Phenotype | 1.079712747 | 0.095289954 | 3.502179609  | 1           |
| WBGene00018846 | <i>eef-1B.1</i>  | Different Phenotype | 0.412676056 | 0.935769004 | -1.181142708 | 0.009677419 |
| WBGene00018957 | <i>F56C11.5</i>  | Different Phenotype | 0.06631928  | 0.384141331 | -2.534136948 | 0.001612903 |
| WBGene00018961 | <i>F56D1.3</i>   | Same Phenotype      | 0.924537257 | 1.207006369 | -0.384629926 | 0.125806452 |
| WBGene00019001 | <i>F57B10.3</i>  | Different Phenotype | 0.826587796 | 0.671541386 | 0.299691749  | 0.84516129  |



## Sheet1

|                |                   |                     |             |             |              |             |
|----------------|-------------------|---------------------|-------------|-------------|--------------|-------------|
| WBGene00019076 | <i>F59A3.3</i>    | Different Phenotype | 0.613636364 | 0.084235156 | 2.86488959   | 1           |
| WBGene00019126 | <i>F59E12.11</i>  | Same Phenotype      | 0.492827869 | 1.724658519 | -1.807154992 | 0.001612903 |
| WBGene00019353 | <i>K03B4.1</i>    | Different Phenotype | 0.241274659 | 0.839697065 | -1.79919255  | 0.001612903 |
| WBGene00019380 | <i>K04C2.2</i>    | Different Phenotype | 0.936065574 | 0.189214759 | 2.306584975  | 1           |
| WBGene00019400 | <i>K04G7.1</i>    | Same Phenotype      | 0.809859155 | 0.485562758 | 0.738013254  | 0.996774194 |
| WBGene00019432 | <i>knl-2</i>      | Different Phenotype | 0.067614505 | 0.076752563 | -0.18288216  | 0.280645161 |
| WBGene00019455 | <i>K06H7.1</i>    | Same Phenotype      | 0.243283582 | 1.262654668 | -2.375749252 | 0.001612903 |
| WBGene00019680 | <i>K12H4.5</i>    | Different Phenotype | 0.443556719 | 0.407569141 | 0.122073775  | 0.65483871  |
| WBGene00019759 | <i>M03F4.6</i>    | Different Phenotype | 0.941626129 | 0.580449827 | 0.697982986  | 0.990322581 |
| WBGene00019823 | <i>fnta-1</i>     | Different Phenotype | 0.813617345 | 0.571663244 | 0.509184902  | 0.95483871  |
| WBGene00019836 | <i>R02F2.7</i>    | Different Phenotype | 0.456182473 | 0.37809016  | 0.270880715  | 0.832258065 |
| WBGene00020105 | <i>R148.7</i>     | Different Phenotype | 1.080516899 | 1.054108216 | 0.035698651  | 0.512903226 |
| WBGene00020279 | <i>glb-25</i>     | Different Phenotype | 0.90555464  | 0.924644754 | -0.030097498 | 0.44516129  |
| WBGene00020392 | <i>knl-3</i>      | Different Phenotype | 1.04552352  | 0.730514358 | 0.517240984  | 0.95483871  |
| WBGene00020558 | <i>T19B4.5</i>    | Different Phenotype | 0.876400996 | 0.581456566 | 0.591919695  | 0.974193548 |
| WBGene00020601 | <i>T20B12.3</i>   | Different Phenotype | 0.309754098 | 0.166035951 | 0.899627717  | 1           |
| WBGene00020705 | <i>T22H9.1</i>    | Same Phenotype      | 1.107359636 | 0.903124014 | 0.294127828  | 0.84516129  |
| WBGene00020827 | <i>T26A8.4</i>    | Different Phenotype | 0.748205411 | 0.269314472 | 1.474142642  | 1           |
| WBGene00020915 | <i>nol-5</i>      | Different Phenotype | 0.069150616 | 0.077736496 | -0.168849984 | 0.296774194 |
| WBGene00021000 | <i>W03F9.2</i>    | Different Phenotype | 1.009863429 | 0.07573367  | 3.73708155   | 1           |
| WBGene00021021 | <i>W04B5.4</i>    | Different Phenotype | 0.564612326 | 0.189378758 | 1.575986111  | 1           |
| WBGene00021060 | <i>dct-11</i>     | Different Phenotype | 0.756080612 | 1.033448674 | -0.450854774 | 0.096774194 |
| WBGene00021061 | <i>W06E11.1</i>   | Different Phenotype | 0.158348294 | 0.066975225 | 1.241401909  | 1           |
| WBGene00021095 | <i>mlt-8</i>      | Different Phenotype | 1.290909091 | 0.421922841 | 1.613336309  | 1           |
| WBGene00021156 | <i>Y4C6B.2</i>    | Different Phenotype | 0.743235117 | 0.697337963 | 0.091960646  | 0.6         |
| WBGene00021270 | <i>Y23H5A.3</i>   | Different Phenotype | 0.597410799 | 0.324949986 | 0.878505632  | 0.996774194 |
| WBGene00021292 | <i>Y25C1A.5</i>   | Different Phenotype | 0.219393939 | 0.153704838 | 0.5133611    | 0.95483871  |
| WBGene00021465 | <i>Y39G10AR.7</i> | Same Phenotype      | 0.057035647 | 1.005981512 | -4.140596095 | 0.001612903 |
| WBGene00021514 | <i>Y41D4B.11</i>  | Different Phenotype | 0.079286798 | 0.060902493 | 0.380579384  | 0.9         |
| WBGene00021626 | <i>Y47D7A.14</i>  | Same Phenotype      | 1.099772382 | 1.013568949 | 0.11776073   | 0.641935484 |
| WBGene00021952 | <i>vha-19</i>     | Different Phenotype | 0.526357199 | 0.964007782 | -0.873002612 | 0.019354839 |
| WBGene00022046 | <i>Y66H1A.4</i>   | Different Phenotype | 2.00393391  | 1.438715953 | 0.478053141  | 0.935483871 |
| WBGene00022117 | <i>Y71F9AL.12</i> | Same Phenotype      | 0.064165103 | 0.970092442 | -3.918261438 | 0.001612903 |
| WBGene00022169 | <i>Y71H2AM.4</i>  | Different Phenotype | 0.620007607 | 0.959137577 | -0.62945185  | 0.04516129  |
| WBGene00022182 | <i>Y71H2AM.17</i> | Different Phenotype | 0.533853176 | 0.531211499 | 0.00715664   | 0.493548387 |
| WBGene00022201 | <i>Y71H10B.1</i>  | Same Phenotype      | 0.963172805 | 1.191606295 | -0.307041088 | 0.151612903 |
| WBGene00022310 | <i>Y77E11A.7</i>  | Different Phenotype | 1.439811172 | 1.054474708 | 0.449355126  | 0.919354839 |
| WBGene00022458 | <i>Y110A7A.8</i>  | Different Phenotype | 0.057269614 | 0.081602808 | -0.510848916 | 0.067741935 |
| WBGene00022591 | <i>cuti-1</i>     | Different Phenotype | 0.620571481 | 0.075921308 | 3.031020649  | 1           |
| WBGene00022598 | <i>ztf-8</i>      | Different Phenotype | 0.905162065 | 1.234125061 | -0.44724057  | 0.096774194 |
| WBGene00022631 | <i>nekl-2</i>     | Same Phenotype      | 0.195433705 | 0.857024106 | -2.132656483 | 0.001612903 |

Sheet1

|                |                 |                     |             |             |              |             |
|----------------|-----------------|---------------------|-------------|-------------|--------------|-------------|
| WBGene00022631 | <i>nekl-2</i>   | Same Phenotype      | 0.276324117 | 0.774175672 | -1.486299487 | 0.001612903 |
| WBGene00022742 | <i>ZK430.7</i>  | Different Phenotype | 0.081632653 | 1.114649682 | -3.771300207 | 0.001612903 |
| WBGene00022793 | <i>ZK686.3</i>  | Different Phenotype | 0.644672498 | 0.335516739 | 0.942181693  | 1           |
| WBGene00022864 | <i>ZK1236.5</i> | Different Phenotype | 1.008495146 | 0.392998679 | 1.359607771  | 1           |
| WBGene00044318 | <i>tag-267</i>  | Different Phenotype | 1.004739336 | 0.810204082 | 0.310464008  | 0.848387097 |
| WBGene00044321 | <i>tag-264</i>  | Different Phenotype | 0.061861521 | 0.056381958 | 0.133808732  | 0.664516129 |
